# Supplementary material for: Trends in medication use after the onset of the COVID-19 pandemic in the Republic of Ireland: an interrupted time series study
Source: bioRxiv or medRxiv preprint supplement (doi:10.1101/2023.06.09.23291202), 2023-06-12

## Trends in medication use after the onset of the COVID-19 pandemic in the Republic of Ireland: an interrupted time series study

**Supplementary figure 1.** Actual dispensing (black) and forecasted dispensing (blue, with 95% and 99% prediction intervals) for all therapeutic subgroups

*Therapeutic subgroups appear in alphabetical order by subgroup name*

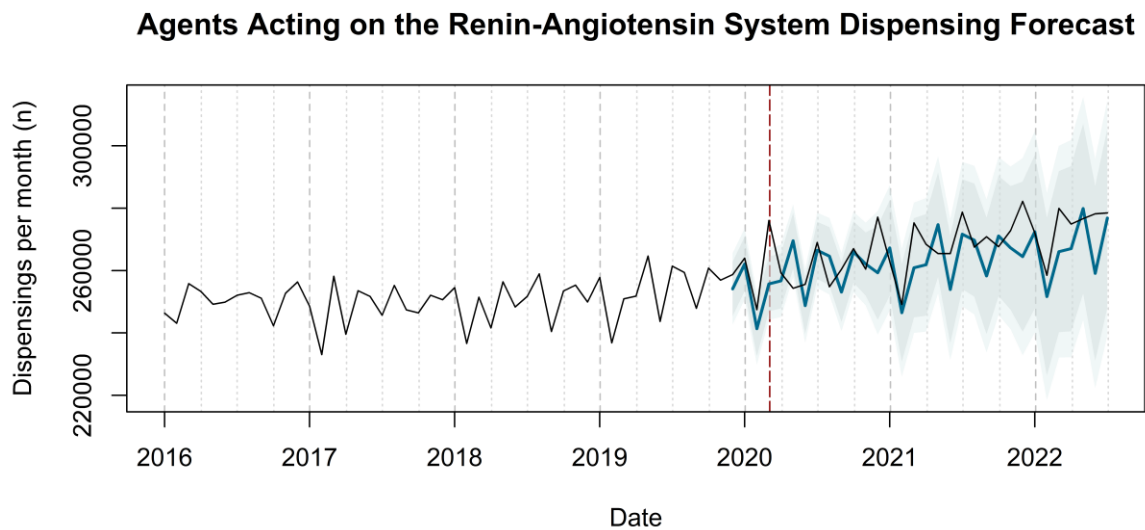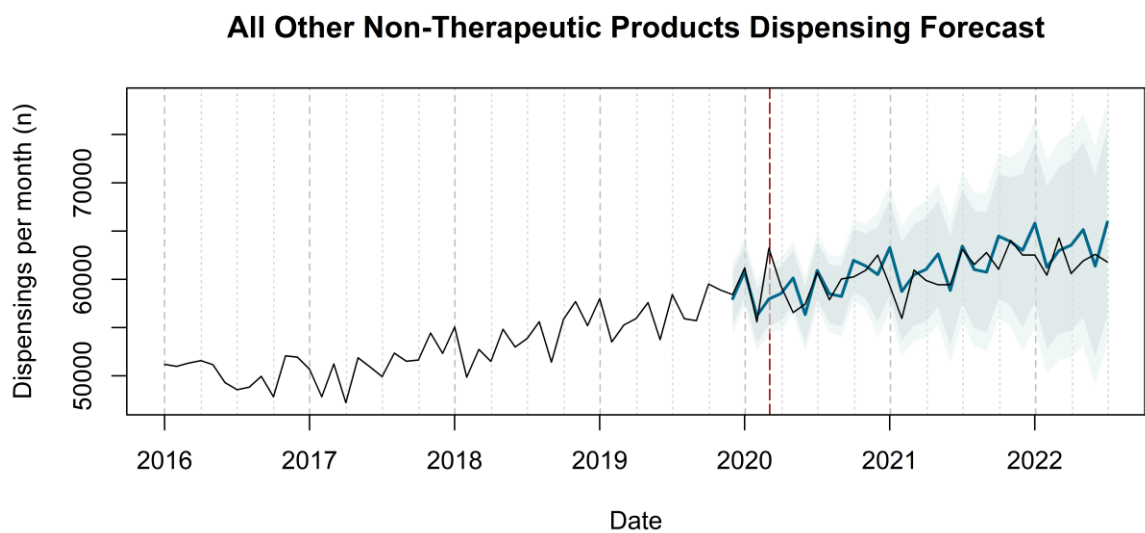

### All Other Therapeutic Products Dispensing Forecast

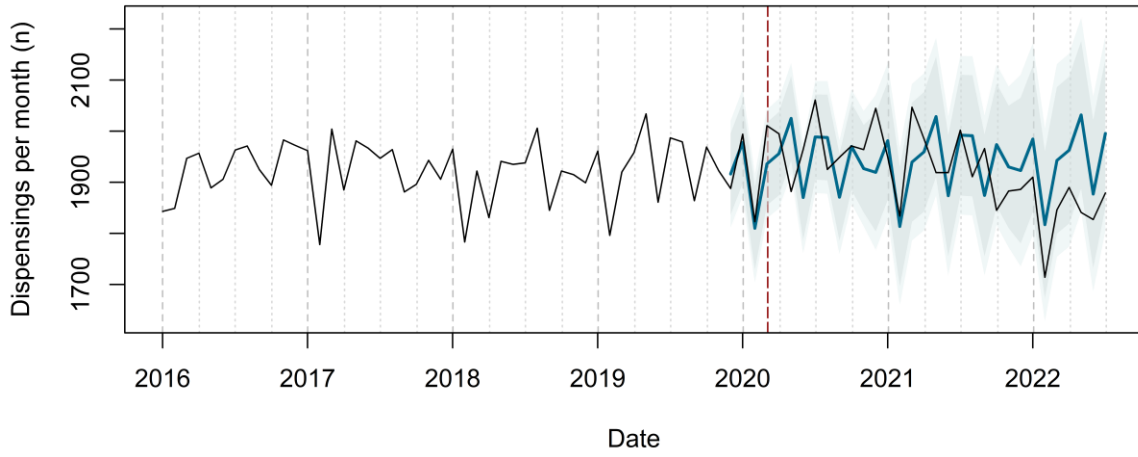

### Analgesics Dispensing Forecast

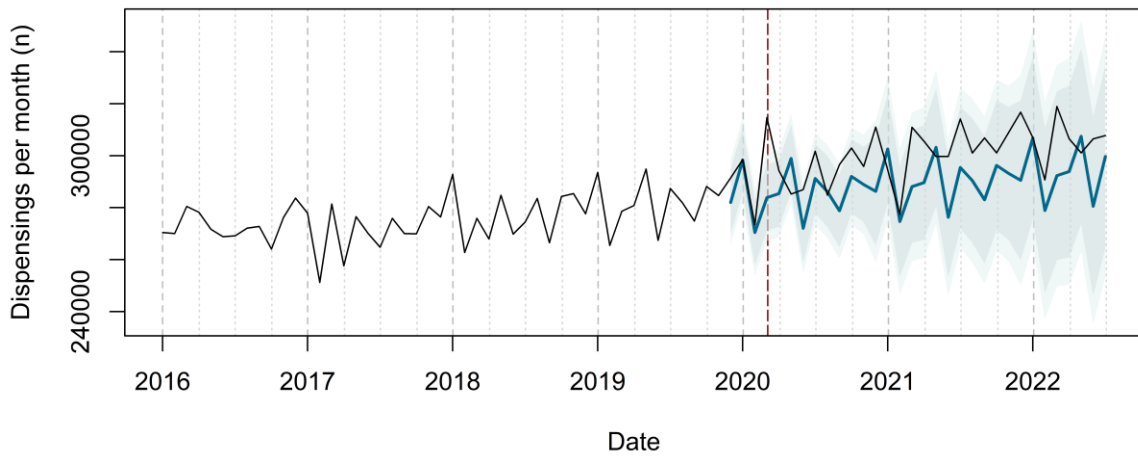

### Anesthetics Dispensing Forecast

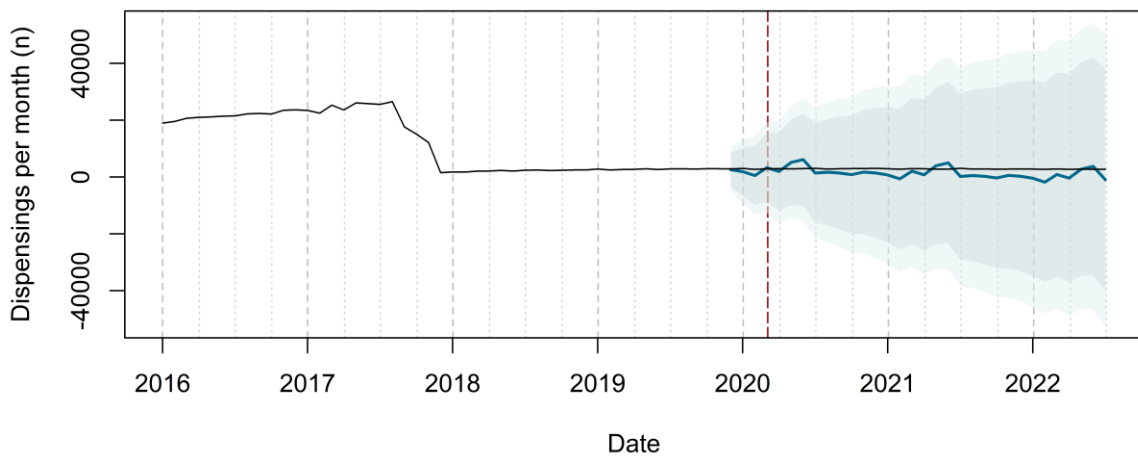

### Anthelmintics Dispensing Forecast

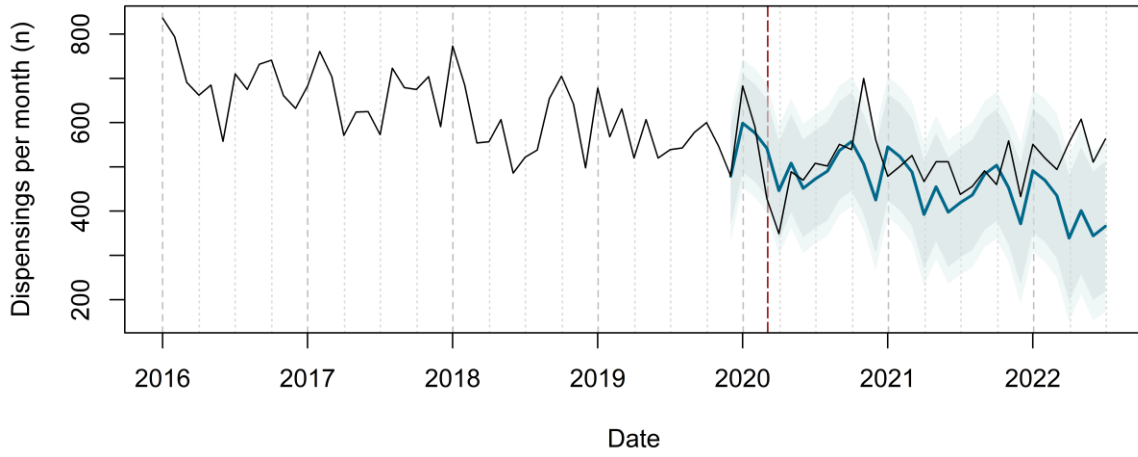

### Anti-Acne Preparations Dispensing Forecast

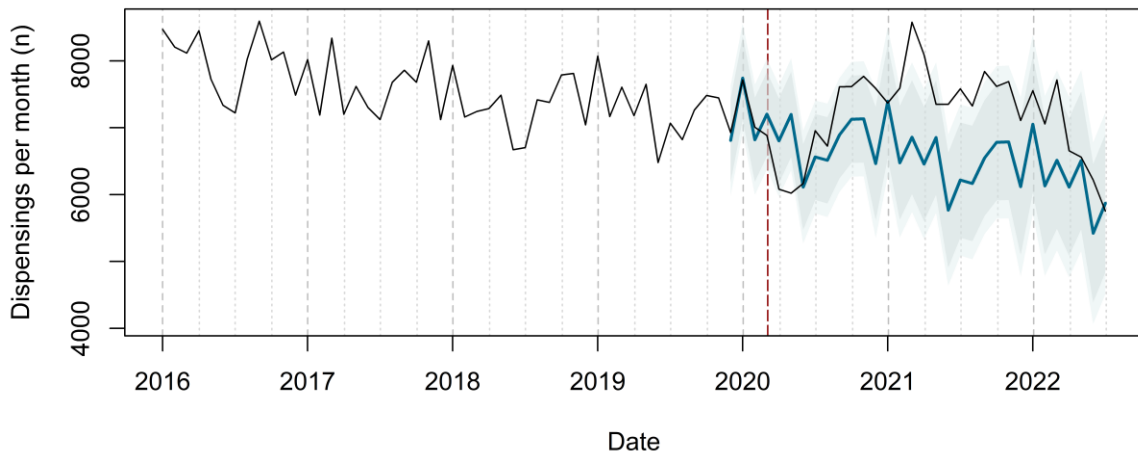

### Antianemic Preparations Dispensing Forecast

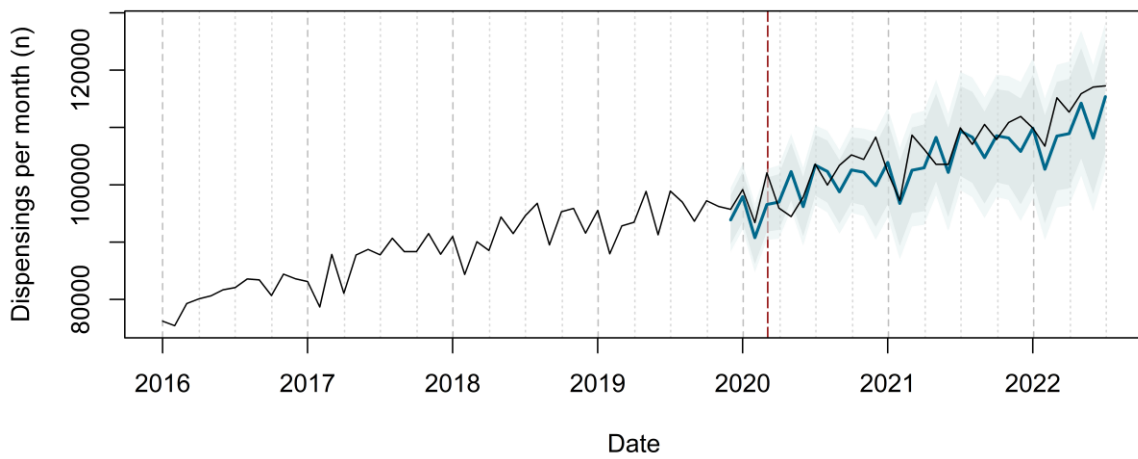

**Antibacterials for Systemic Use Dispensing Forecast**

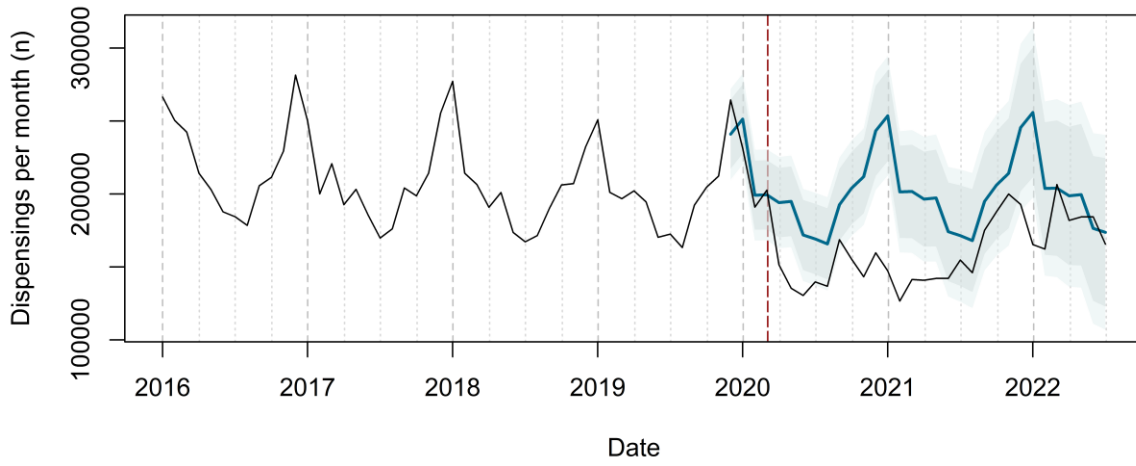

**Antibiotics and Chemotherapeutics for Dermatological Use Dispensing Forecast**

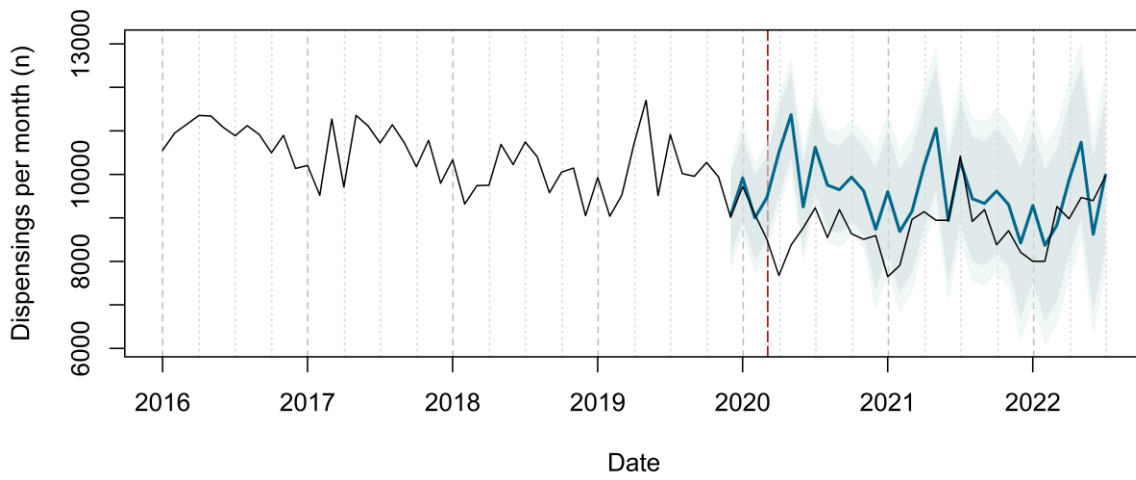

**Antidiarrheals, Intestinal AntiinflammatoryAntiinfective Agents Dispensing Foreca**

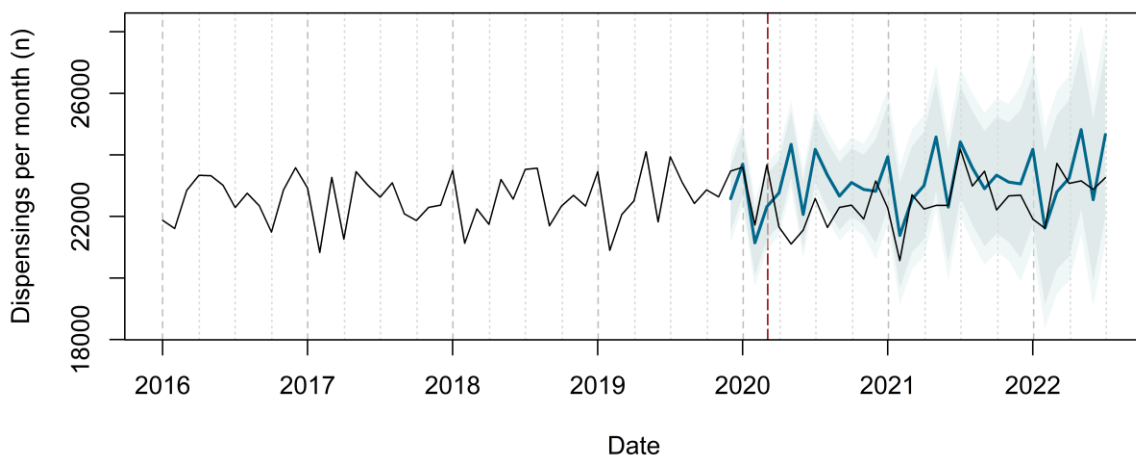

### Antiemetics and Antinauseants Dispensing Forecast

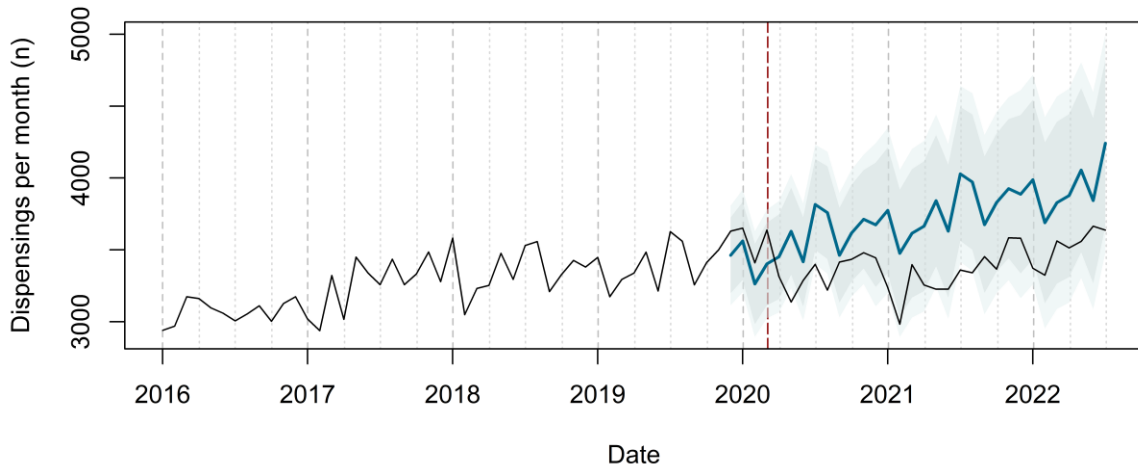

### Antiepileptics Dispensing Forecast

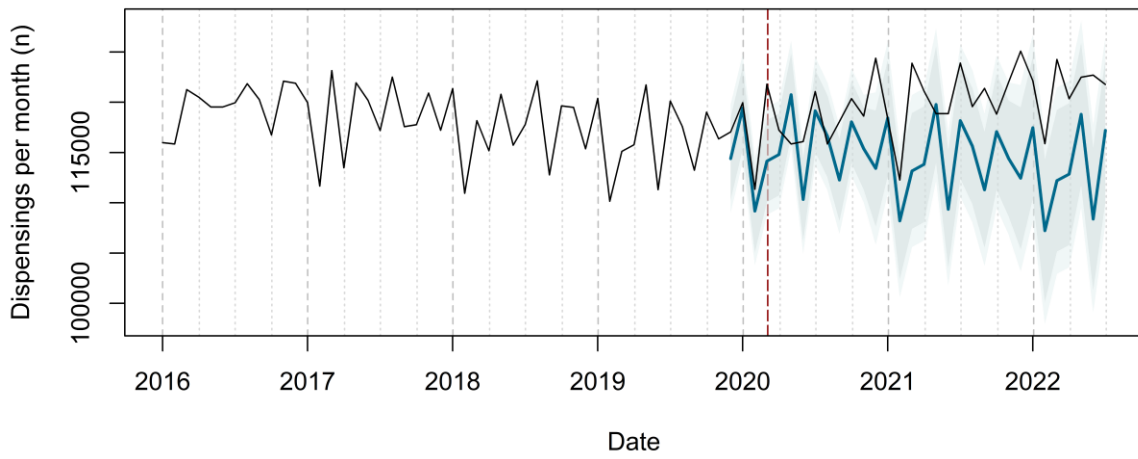

### Antifungals for Dermatological Use Dispensing Forecast

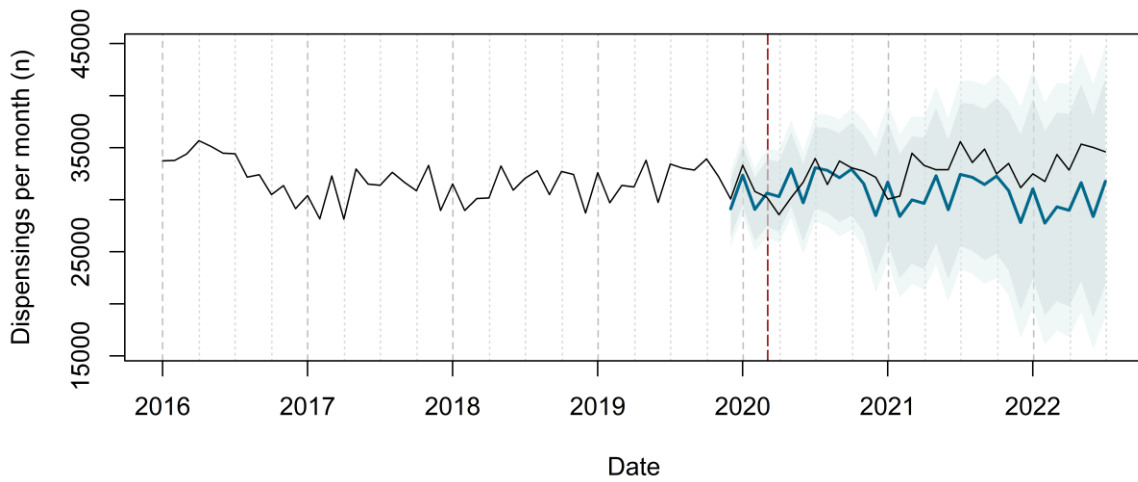

### Antigout Preparations Dispensing Forecast

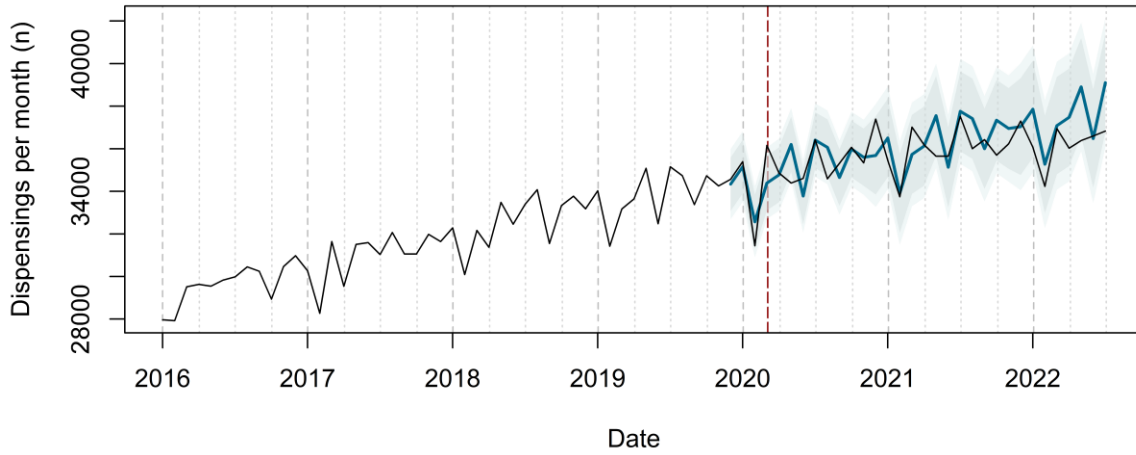

### Antihemorrhagics Dispensing Forecast

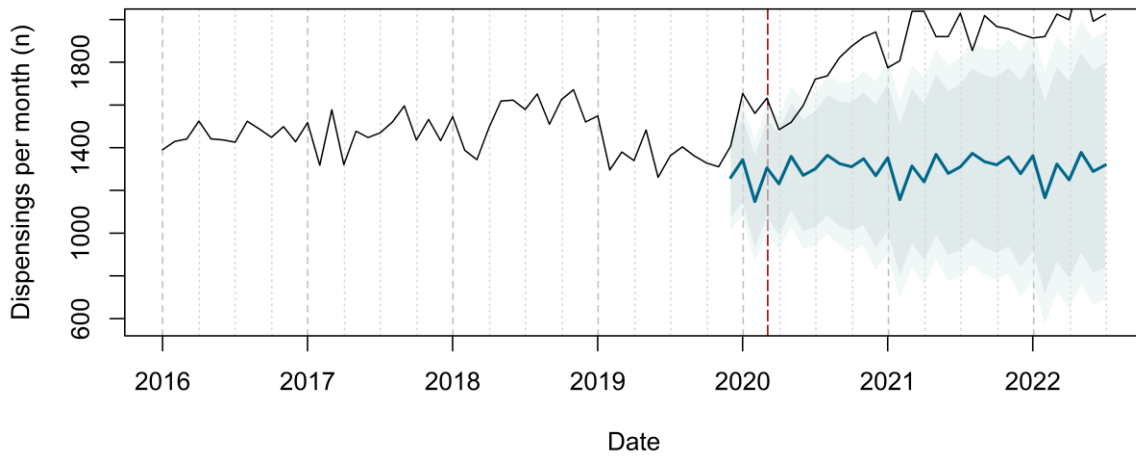

### Antihistamines for Systemic Use Dispensing Forecast

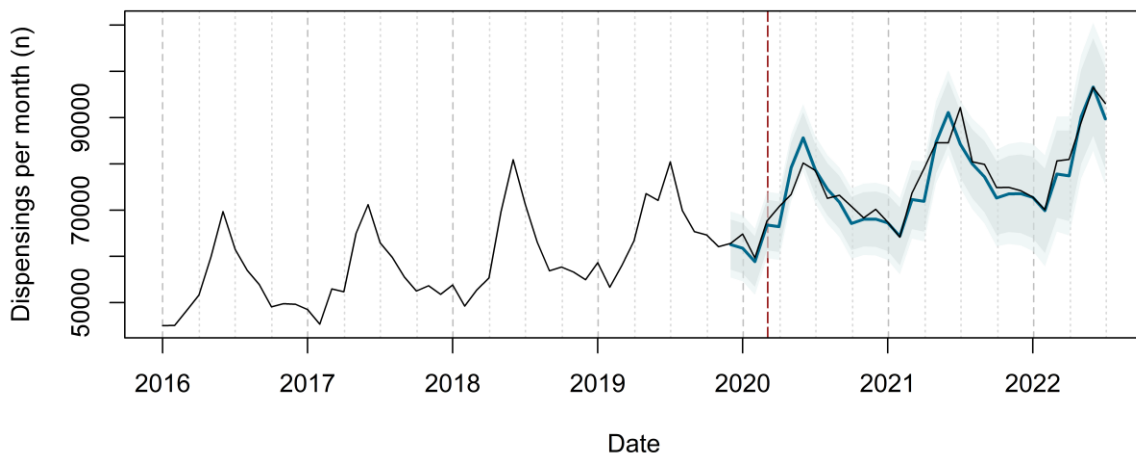

### Antihypertensives Dispensing Forecast

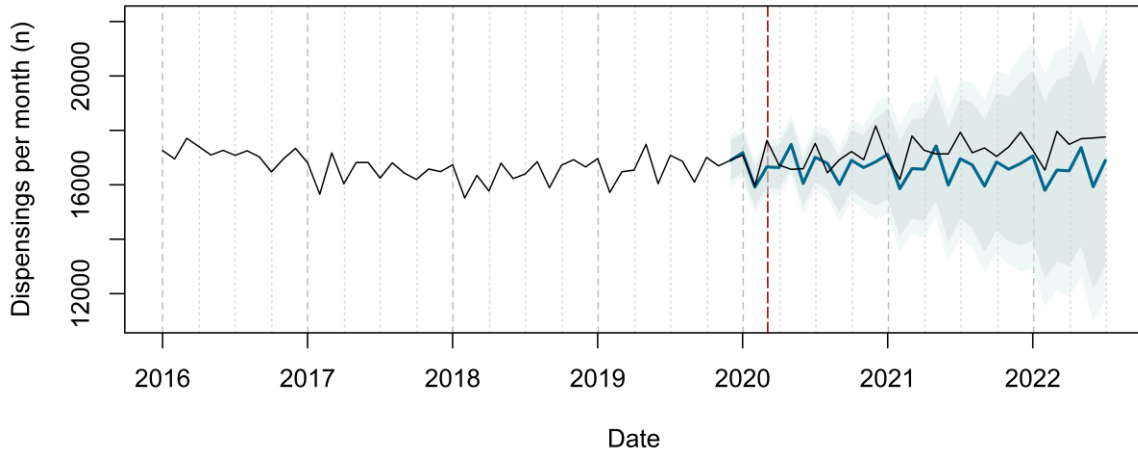

### Antiinflammatory and Antirheumatic Products Dispensing Forecast

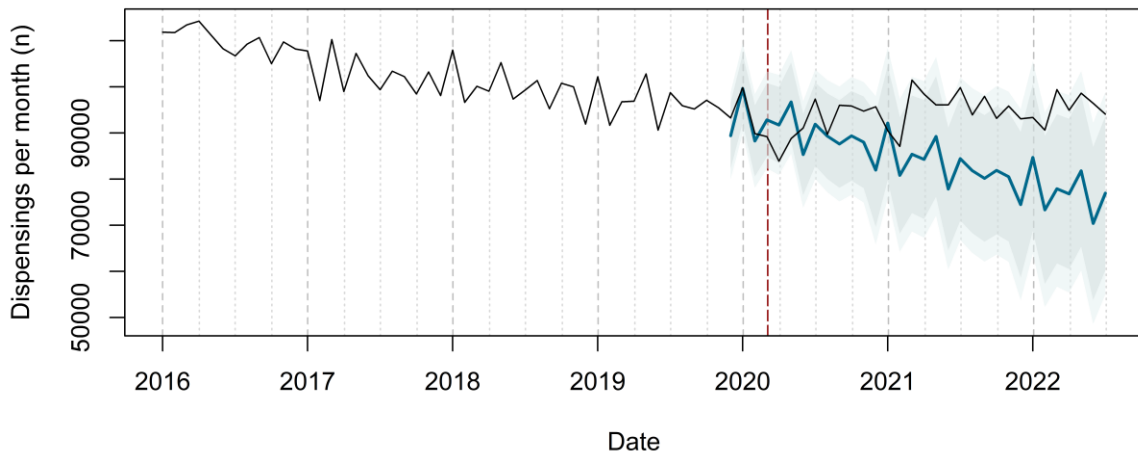

### Antimycobacterials Dispensing Forecast

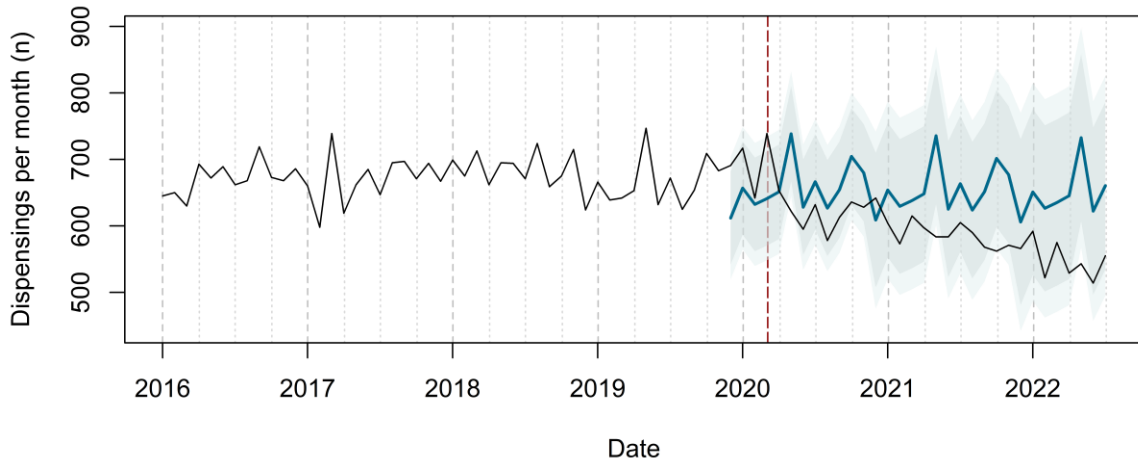

### Antimycotics for Systemic Use Dispensing Forecast

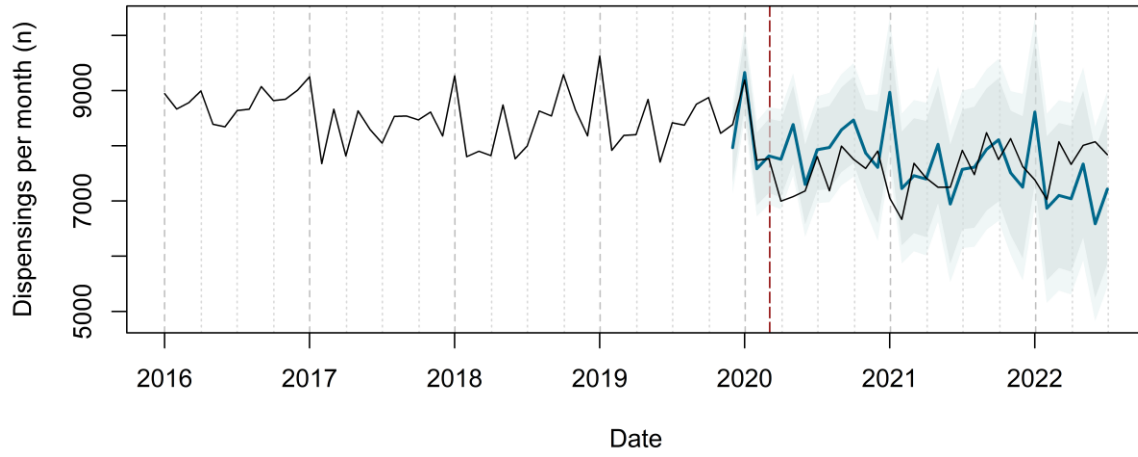

### Antineoplastic Agents Dispensing Forecast

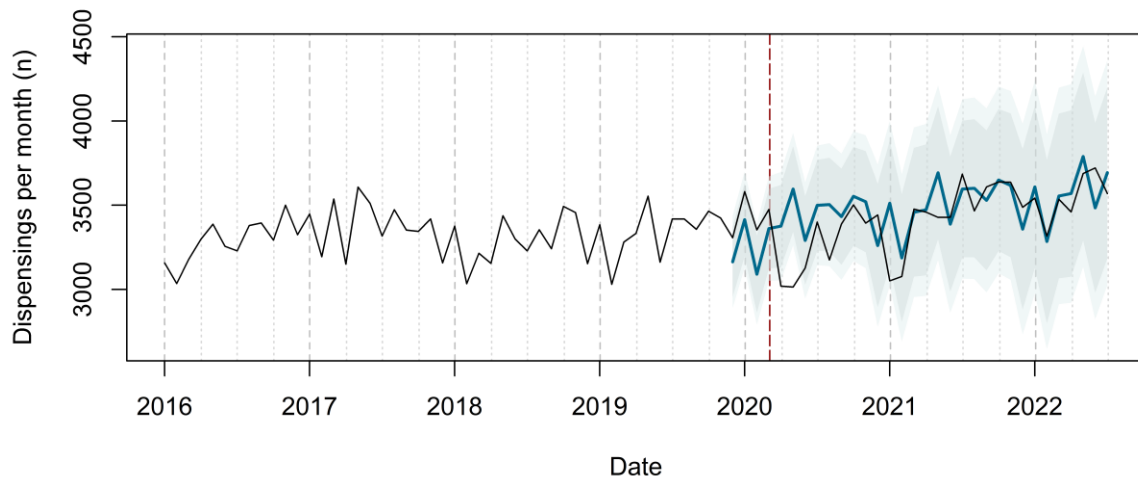

### Anti-Parkinson Drugs Dispensing Forecast

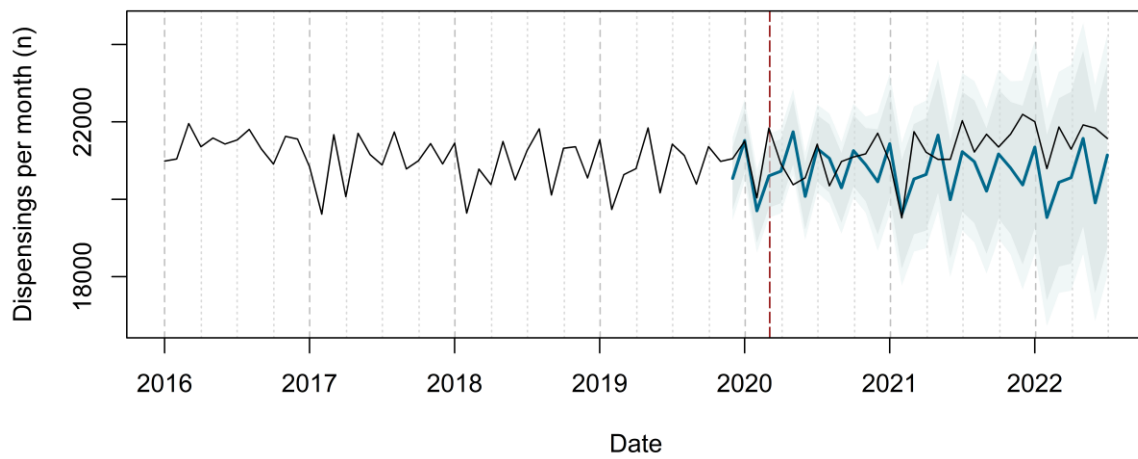



### Antiprotozoals Dispensing Forecast

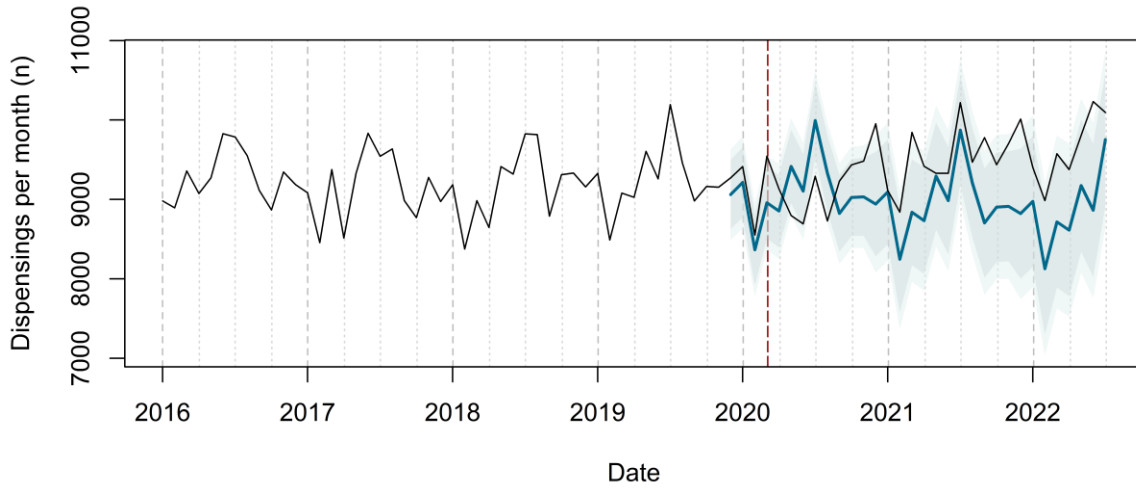

### Antipsoriatics Dispensing Forecast

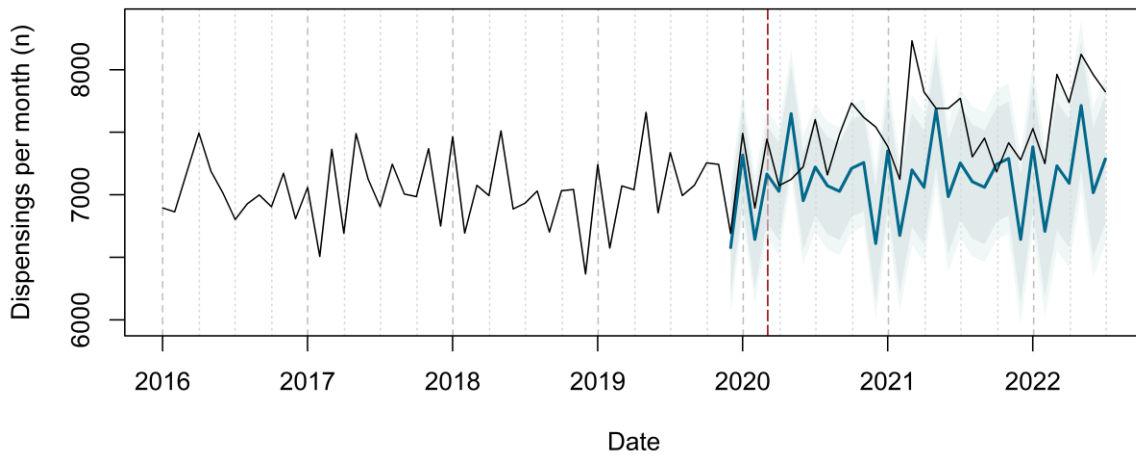

### Antithrombotic Agents Dispensing Forecast

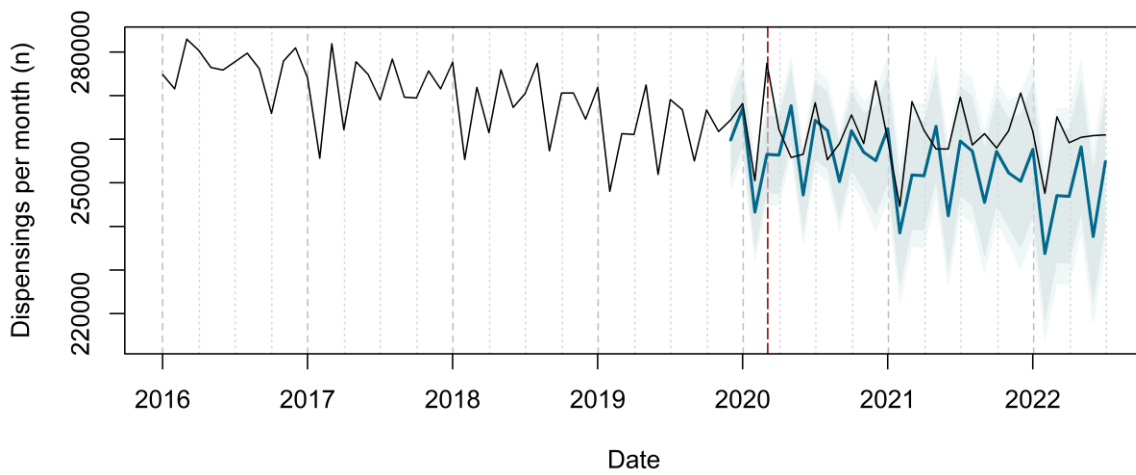

### Antivirals for Systemic Use Dispensing Forecast

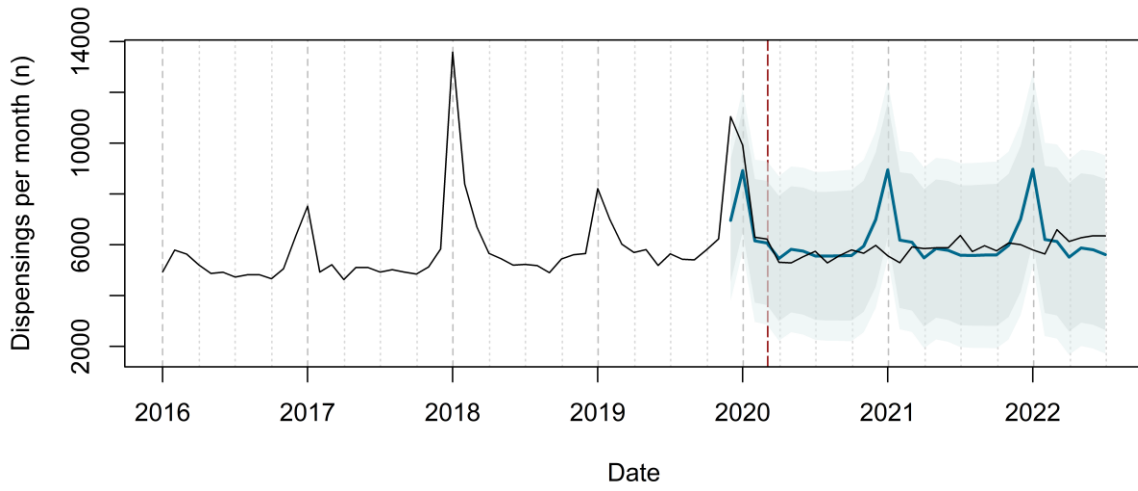

### Beta Blocking Agents Dispensing Forecast

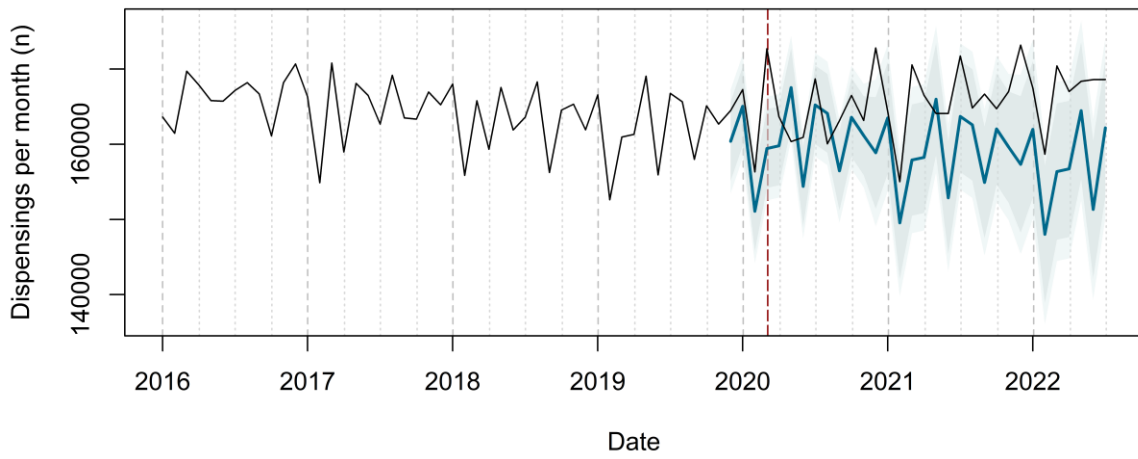

### Bile and Liver Therapy Dispensing Forecast

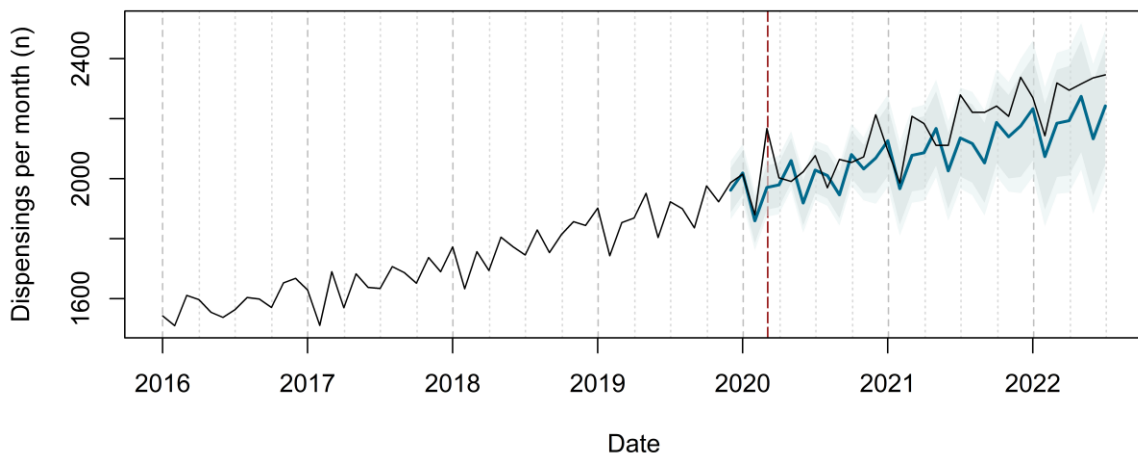

### Calcium Channel Blockers Dispensing Forecast

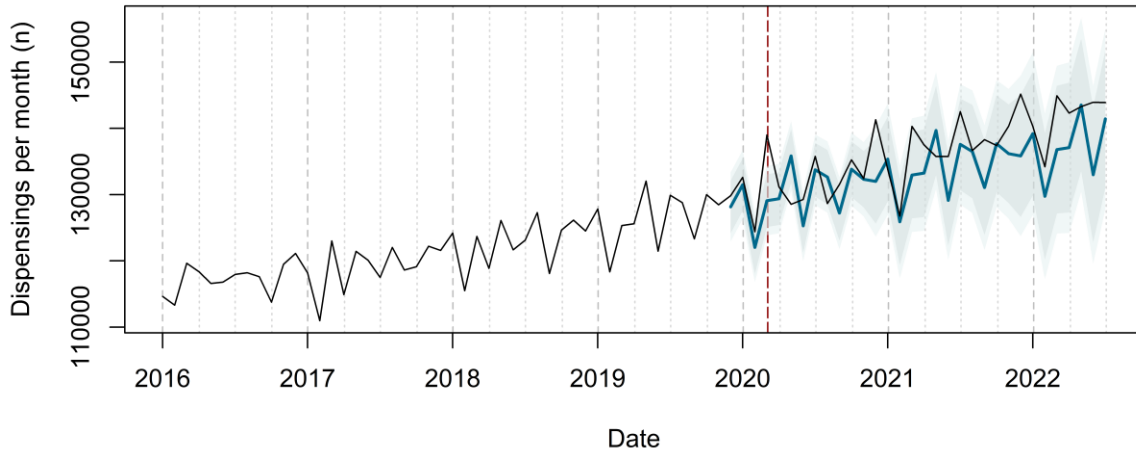

### Cardiac Therapy Dispensing Forecast

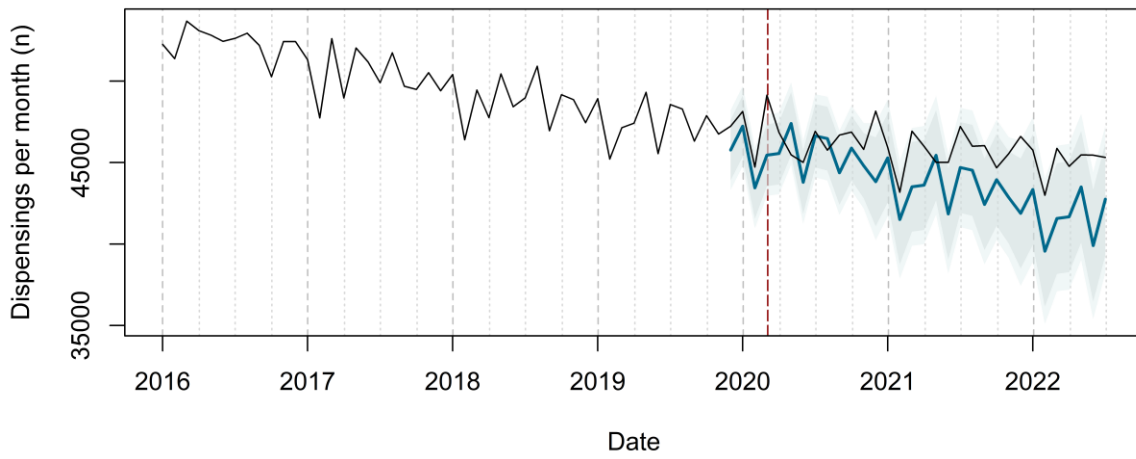

### Corticosteroids Dermatological Preparations Dispensing Forecast

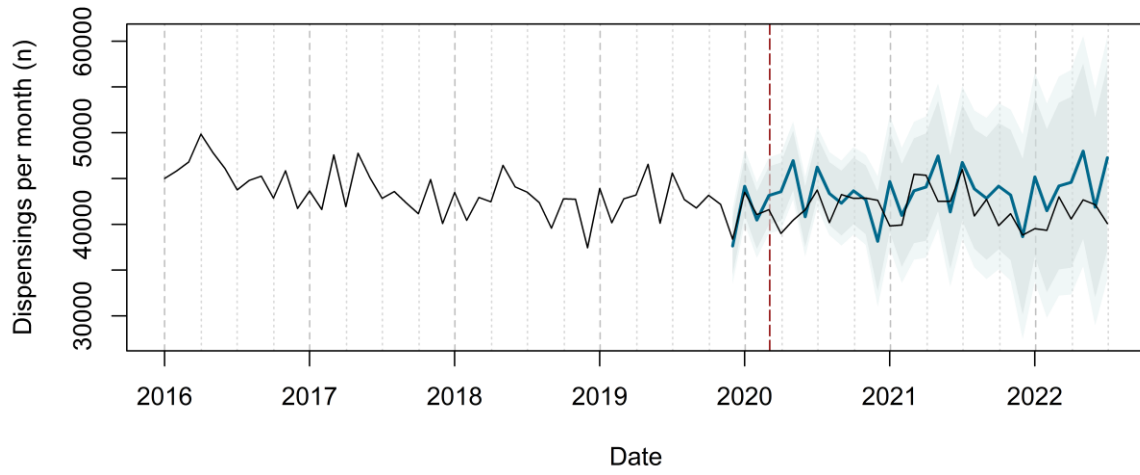

### Corticosteroids for Systemic Use Dispensing Forecast

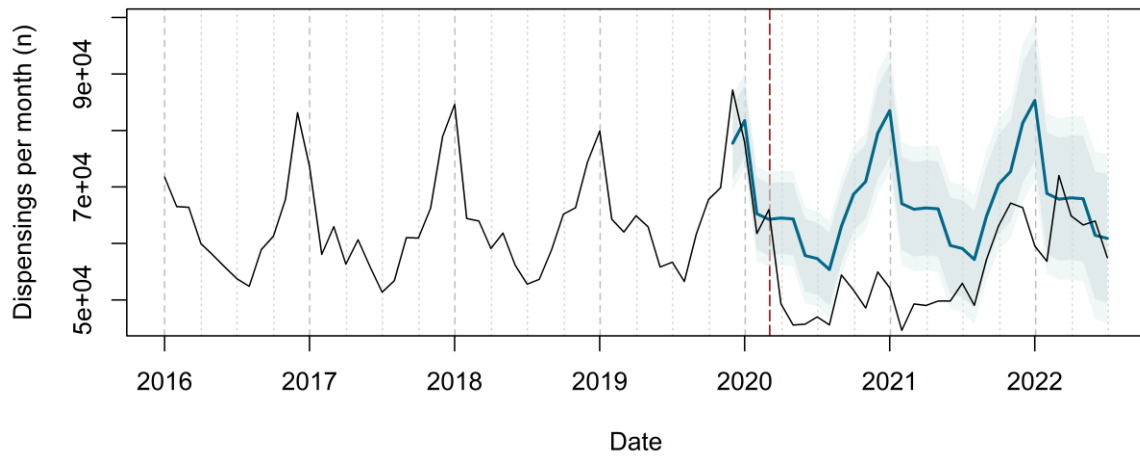

### Cough and Cold Preparations Dispensing Forecast

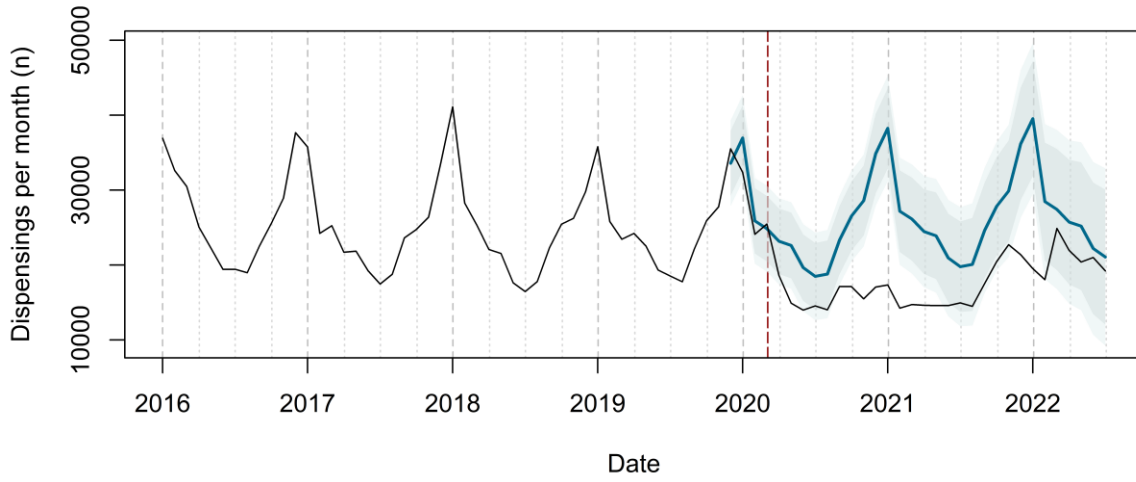

### Diagnostic Agents Dispensing Forecast

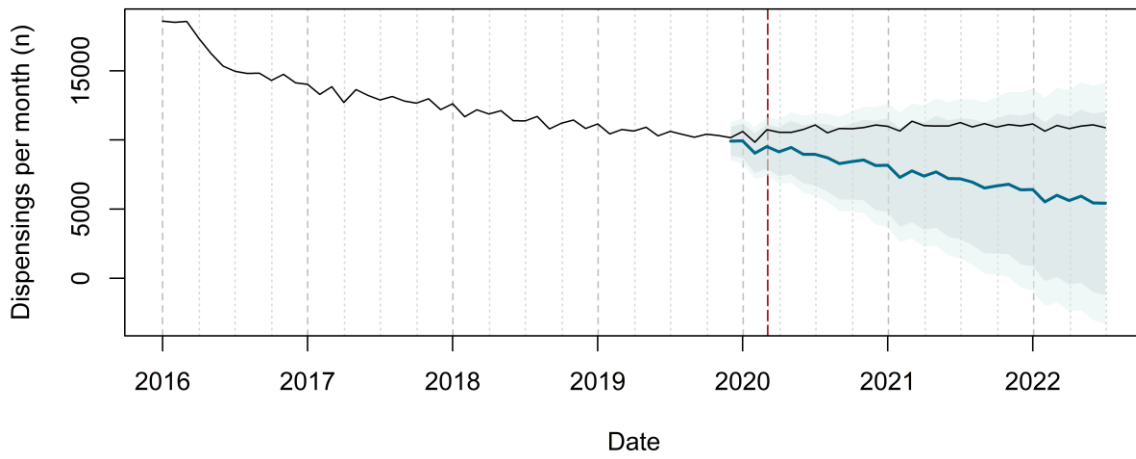

### Digestives incl. Enzymes Dispensing Forecast

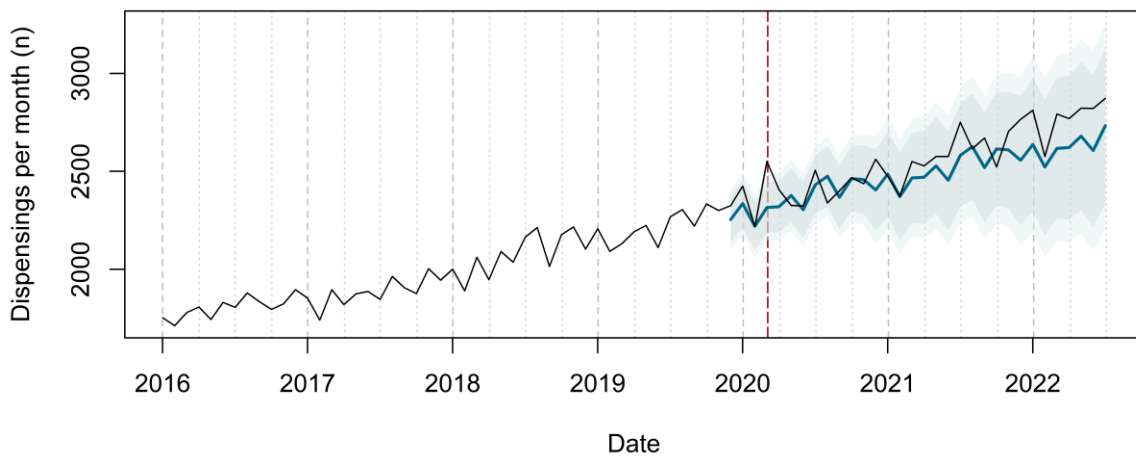

### Diuretics Dispensing Forecast

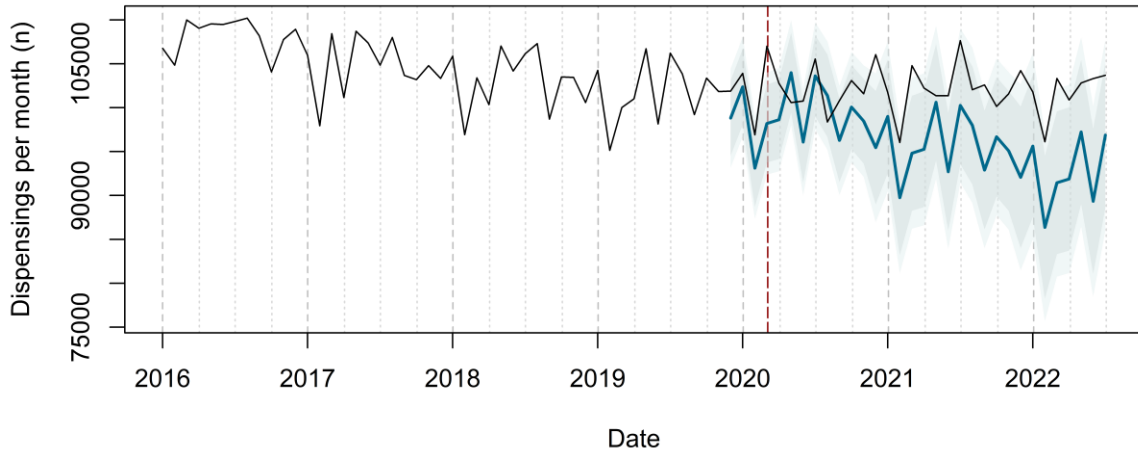

### Dressings Dispensing Forecast

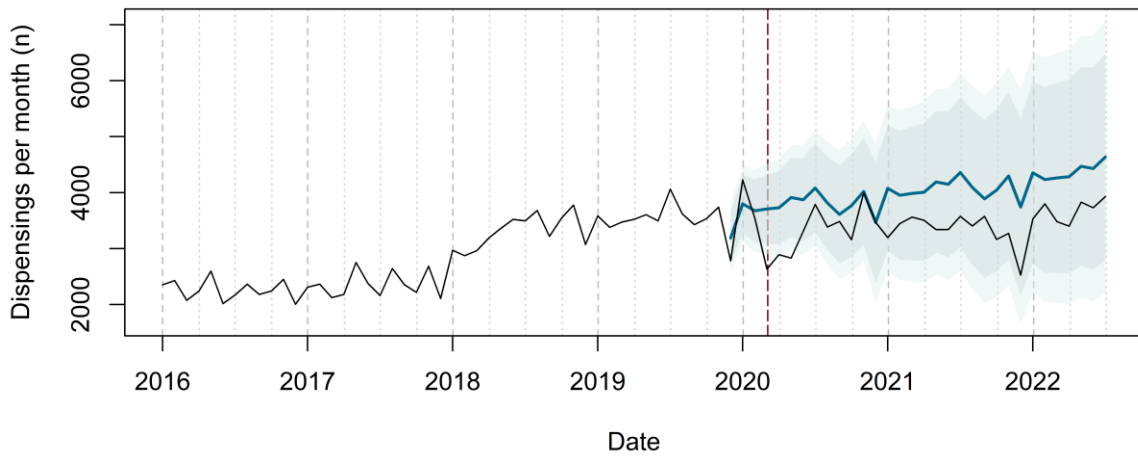

### Drugs for Acid Related Disorders Dispensing Forecast

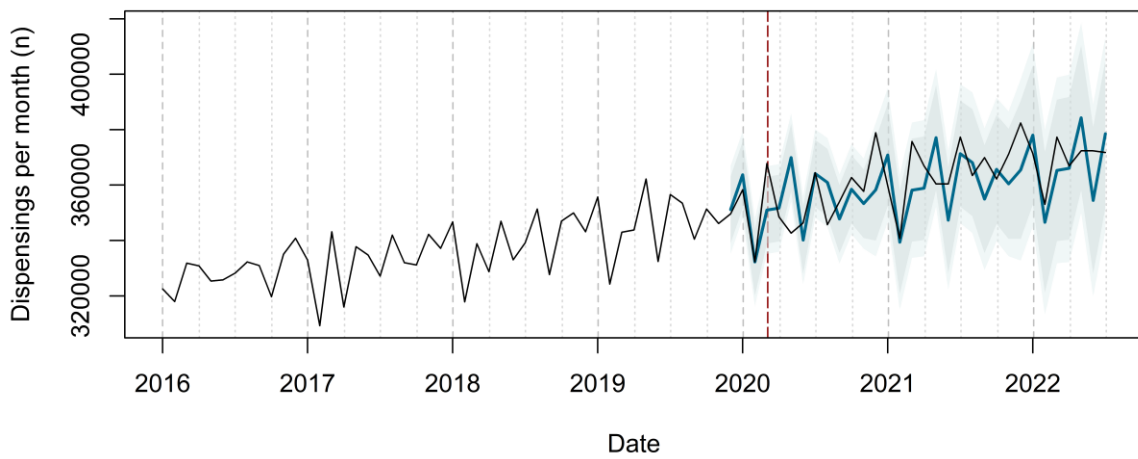

### Drugs for Functional Gastrointestinal Disorders Dispensing Forecast

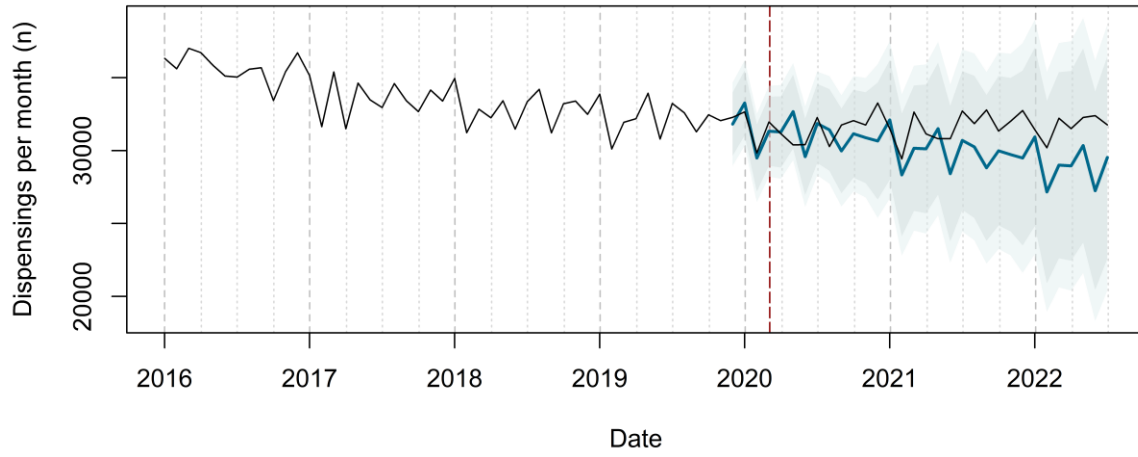

### Drugs for Obstructive Airway Diseases Dispensing Forecast

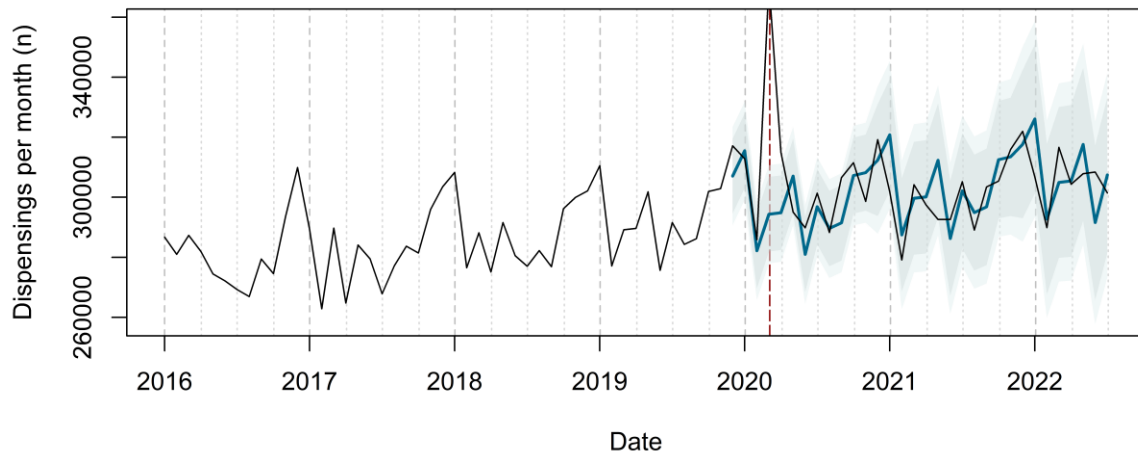

### Drugs for Treatment of Bone Diseases Dispensing Forecast

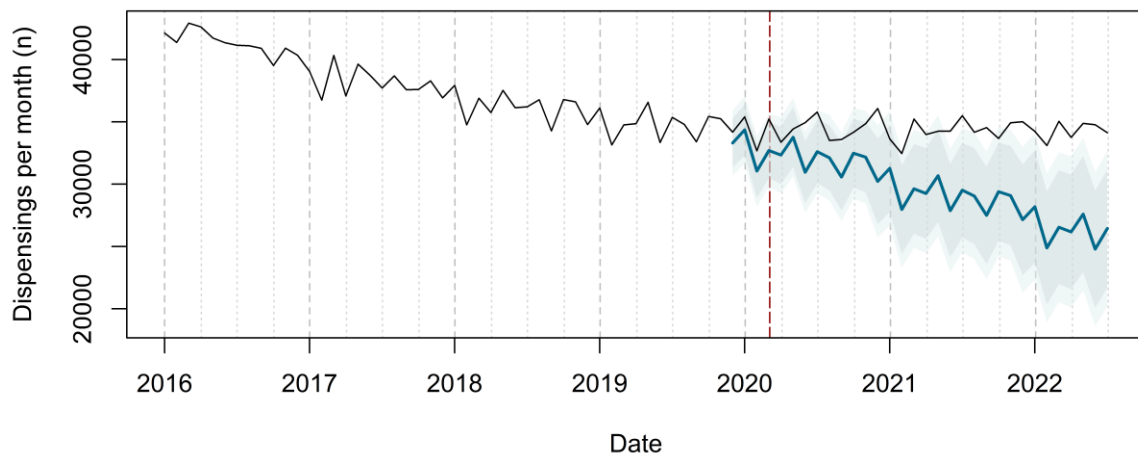

### Drugs Used In Diabetes Dispensing Forecast

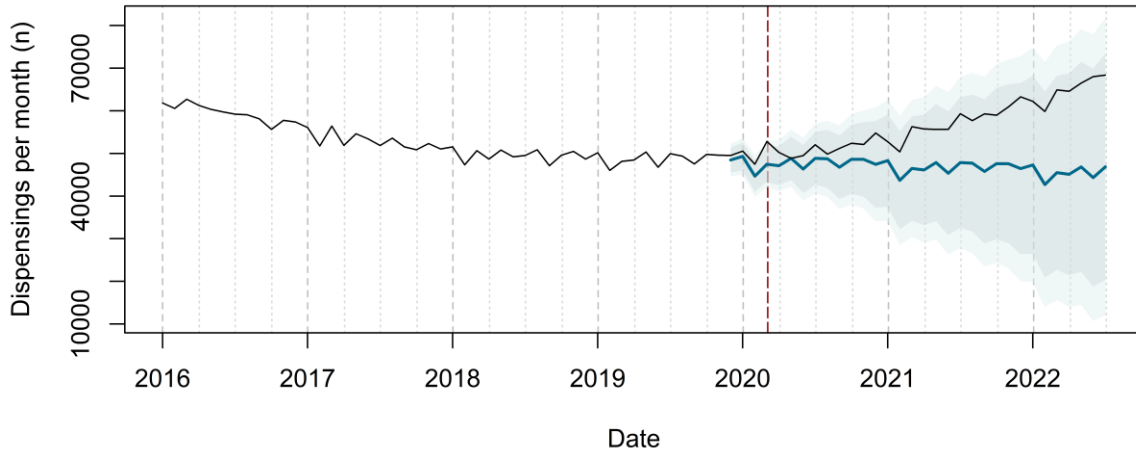

### Ectoparasiticides incl. Scabicides Insecticides and Repellents Dispensing Forecast

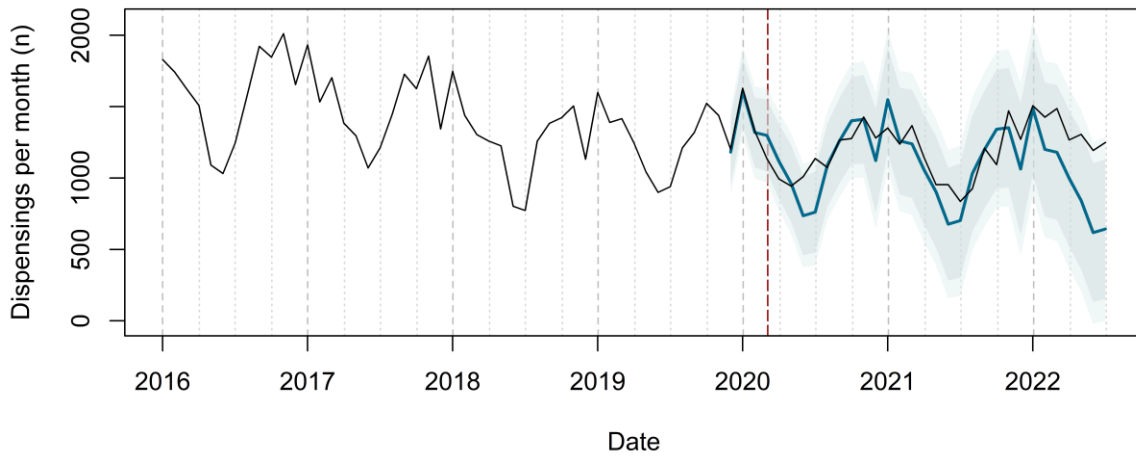

### Emollients and Protectives Dispensing Forecast

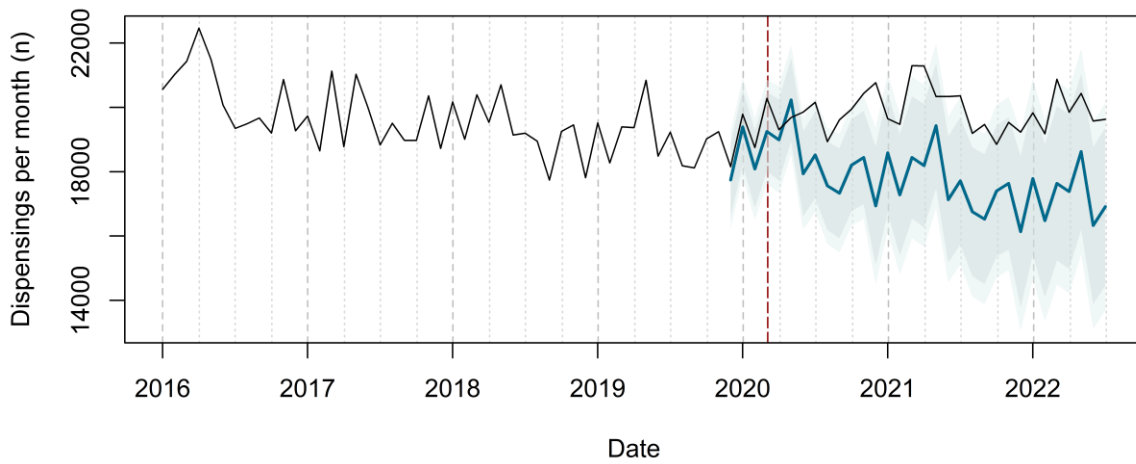



### Endocrine Therapy Dispensing Forecast

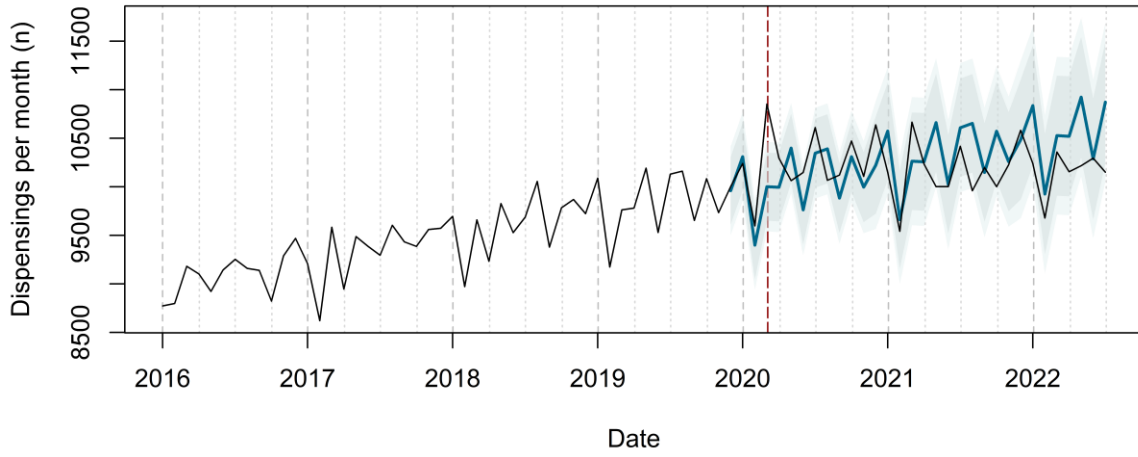

### General Nutrients Dispensing Forecast

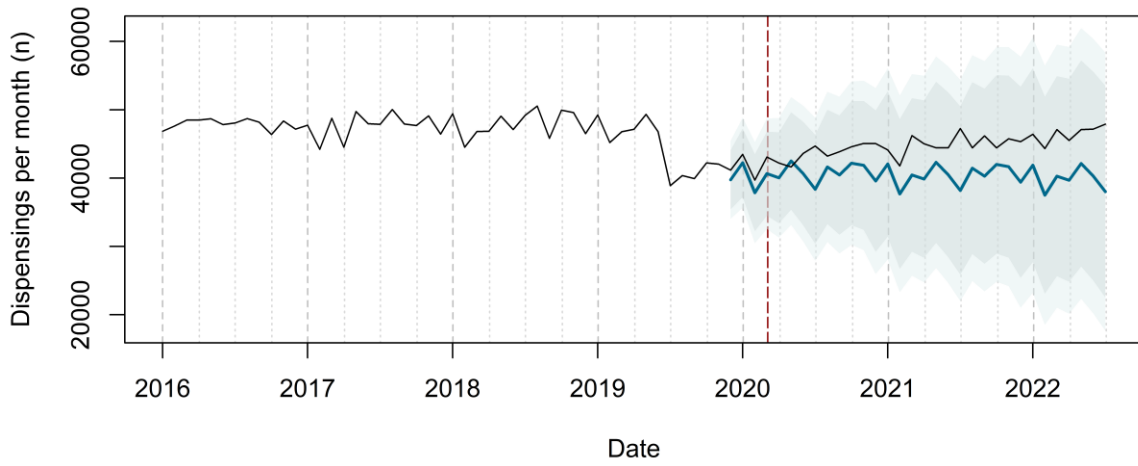

### Gynecological Antiinfectives and Antiseptics Dispensing Forecast

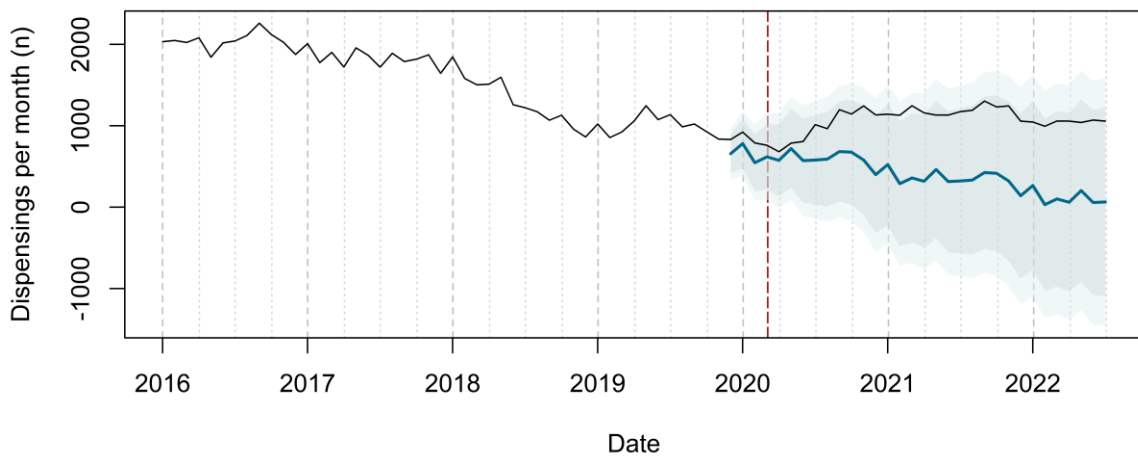

### Immunosuppressive Agents Dispensing Forecast

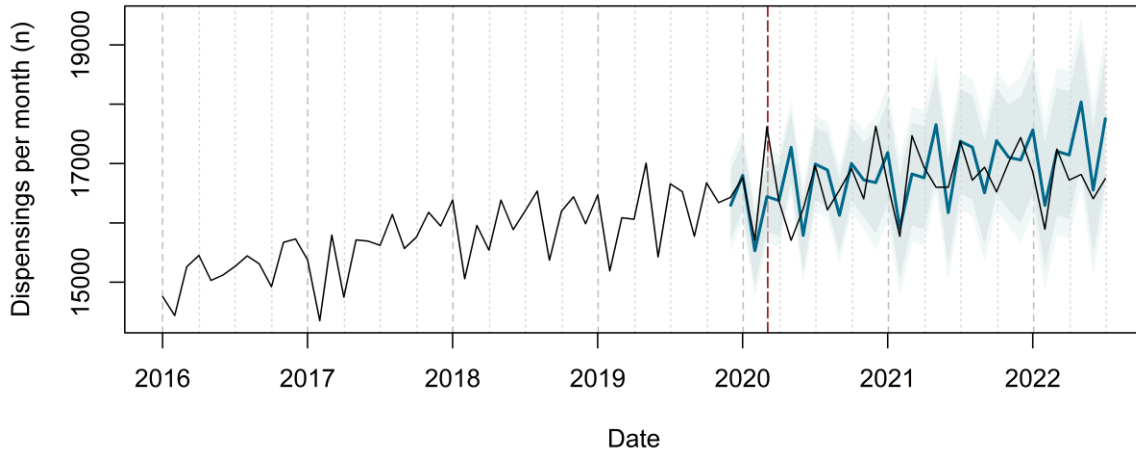

### Laxatives Dispensing Forecast

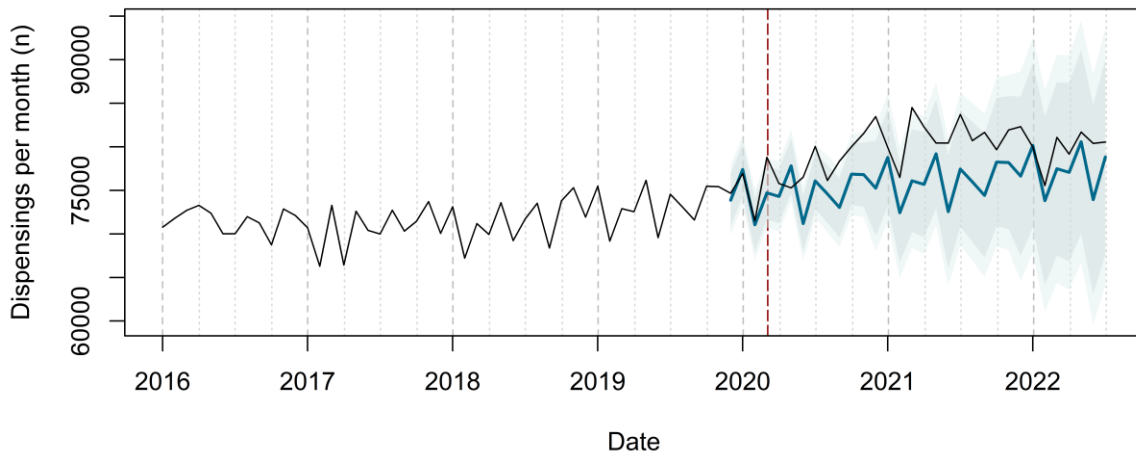

### Mineral Supplements Dispensing Forecast

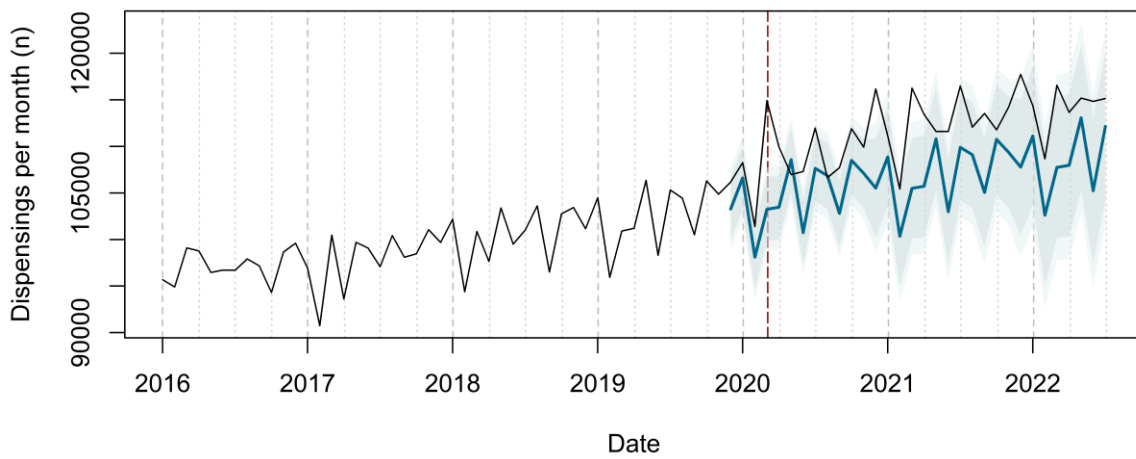

### Miscellaneous Dispensing Forecast

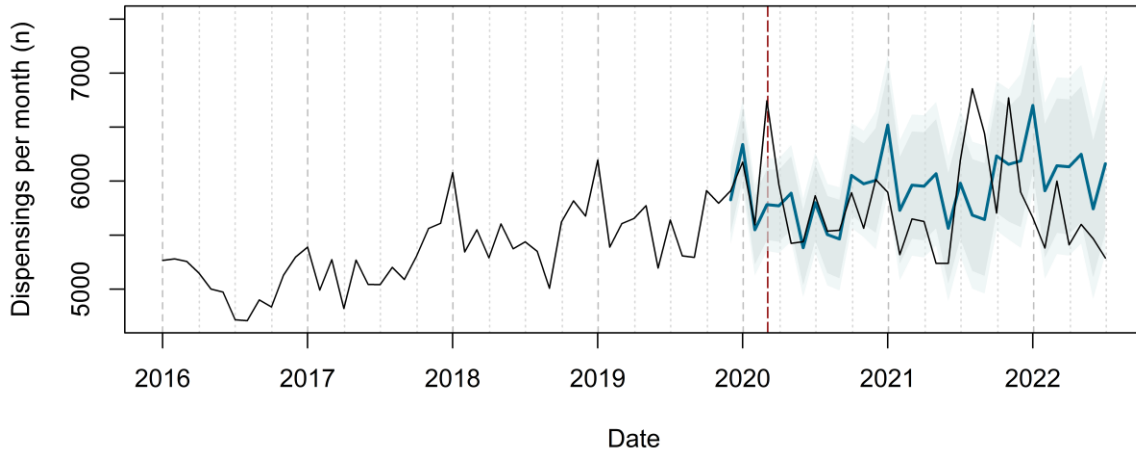

### Muscle Relaxants Dispensing Forecast

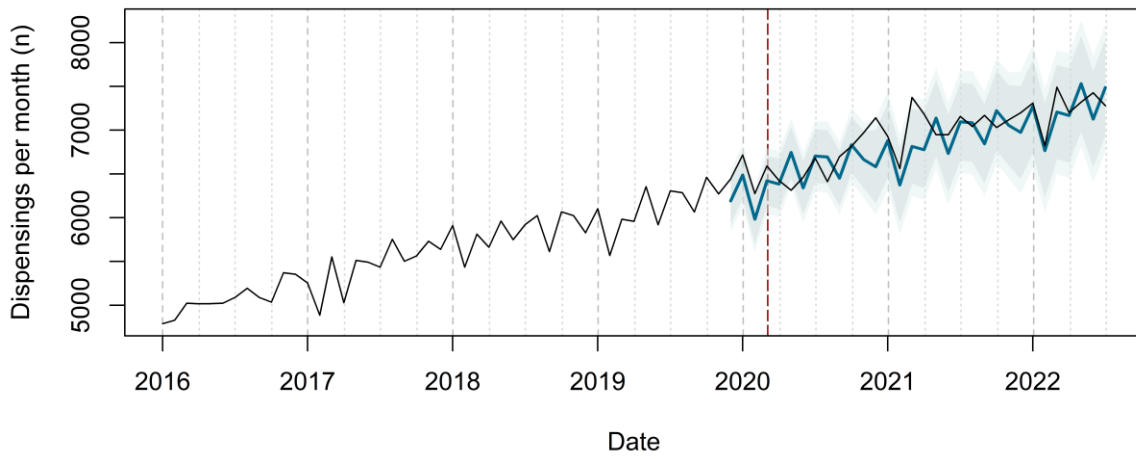

### Nasal Preparations Dispensing Forecast

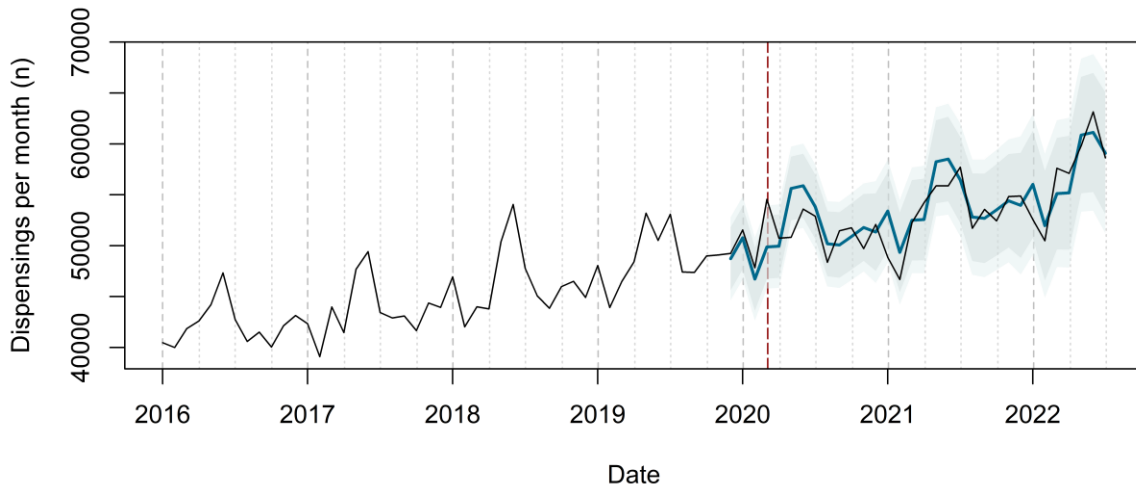

### NeedlesSyringesLancets Dispensing Forecast

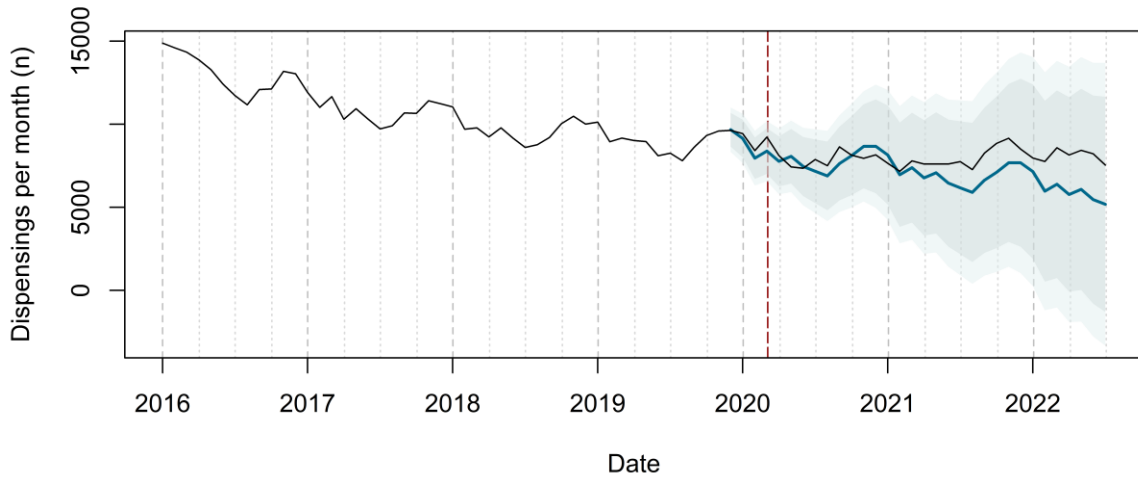

### Ophthalmological and Otological Preparations Dispensing Forecast

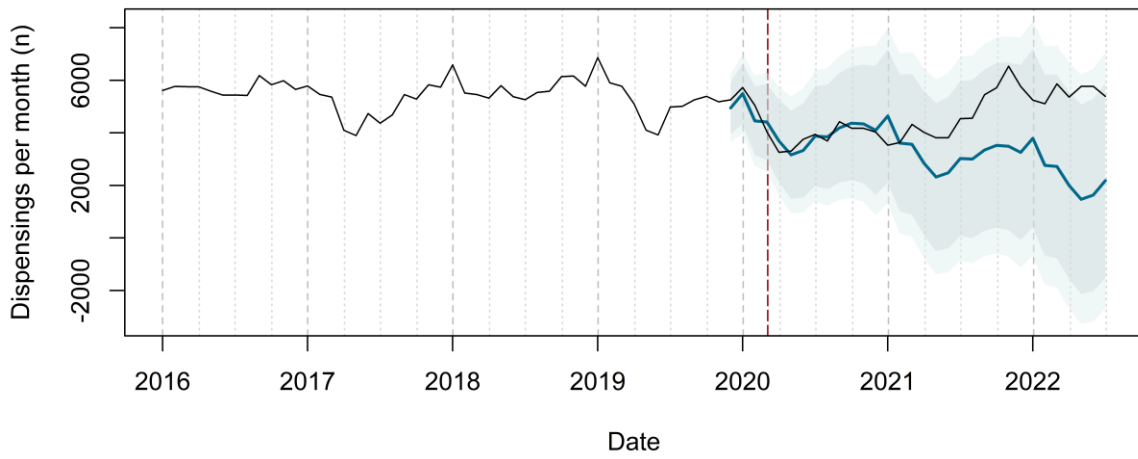

### Ophthalmologicals Dispensing Forecast

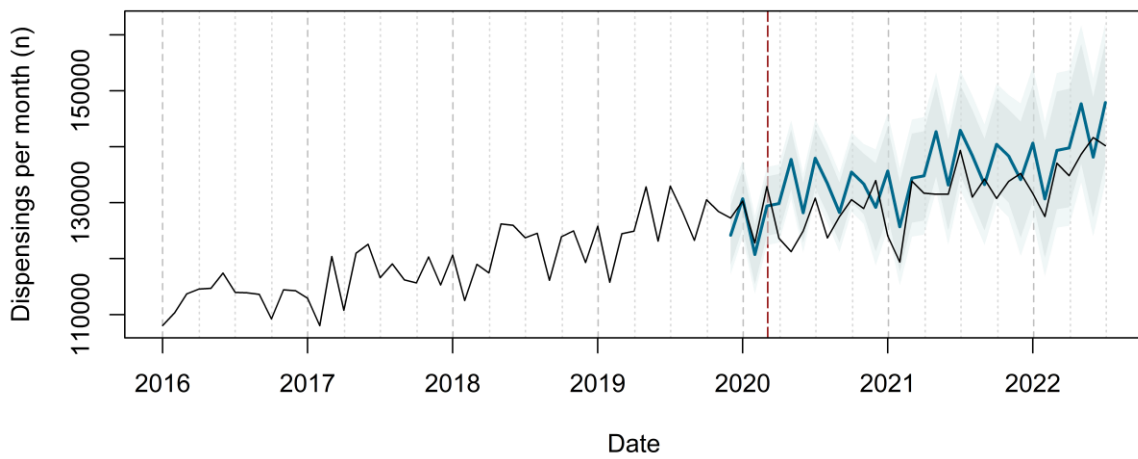

**Other Dermatological Preparations Dispensing Forecast**

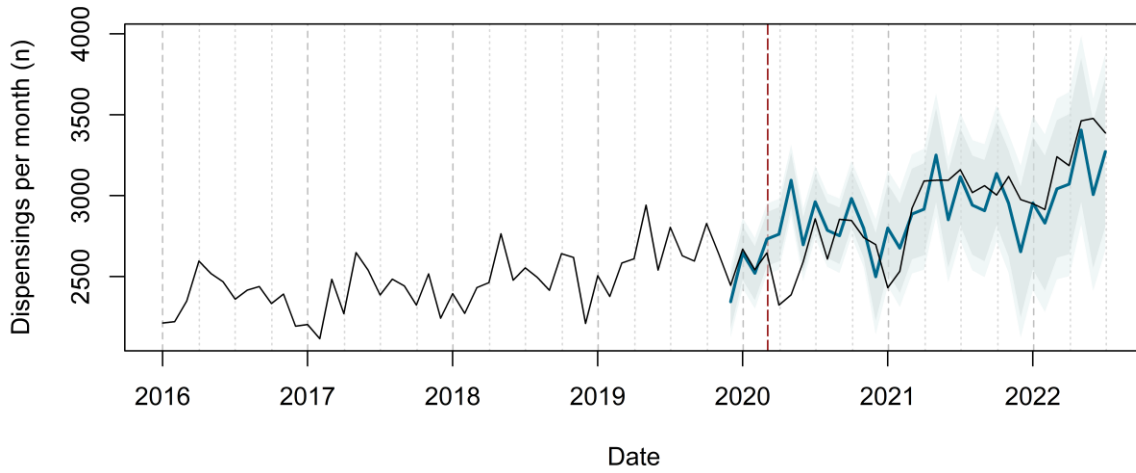

**Other Drugs for Disorders of the Musculo-Skeletal System Dispensing Forecast**

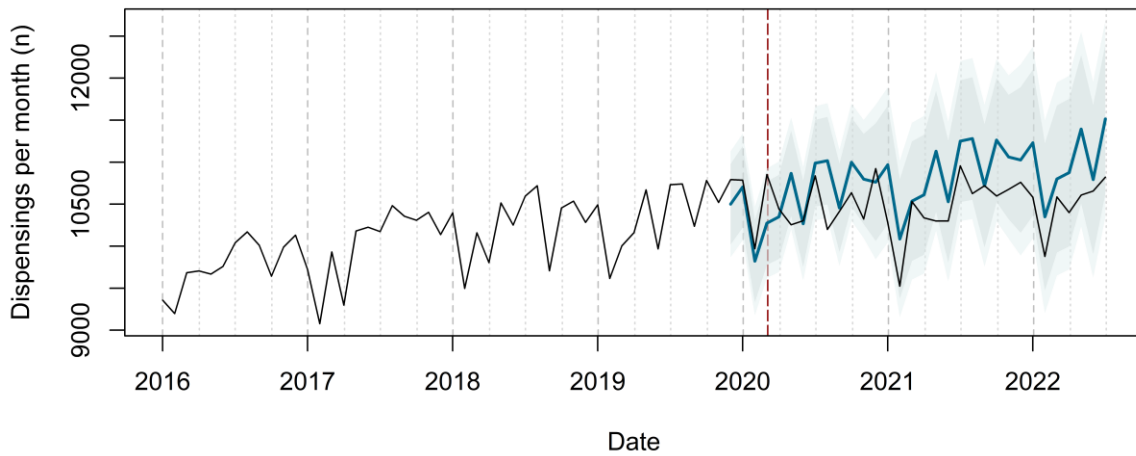

**Other Gynecologicals Dispensing Forecast**

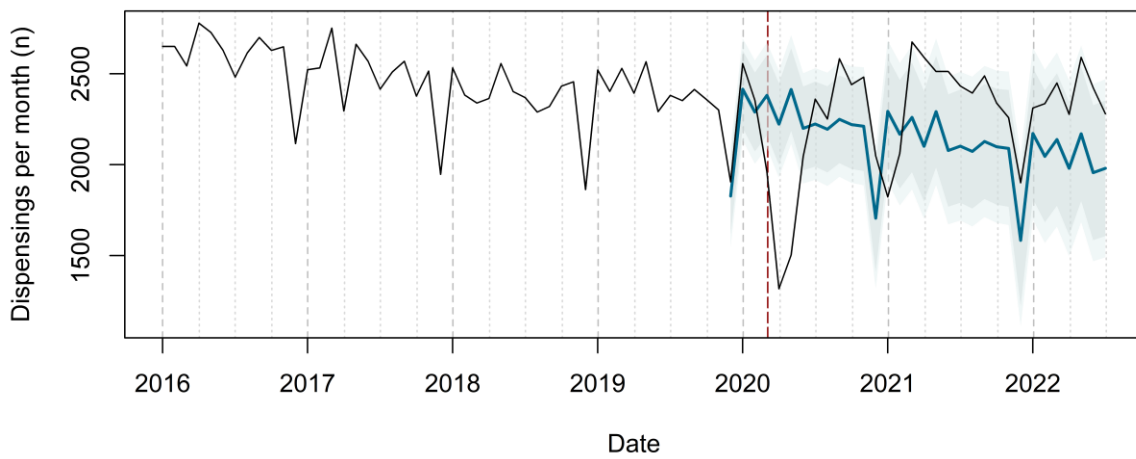

### Other Nervous System Drugs Dispensing Forecast

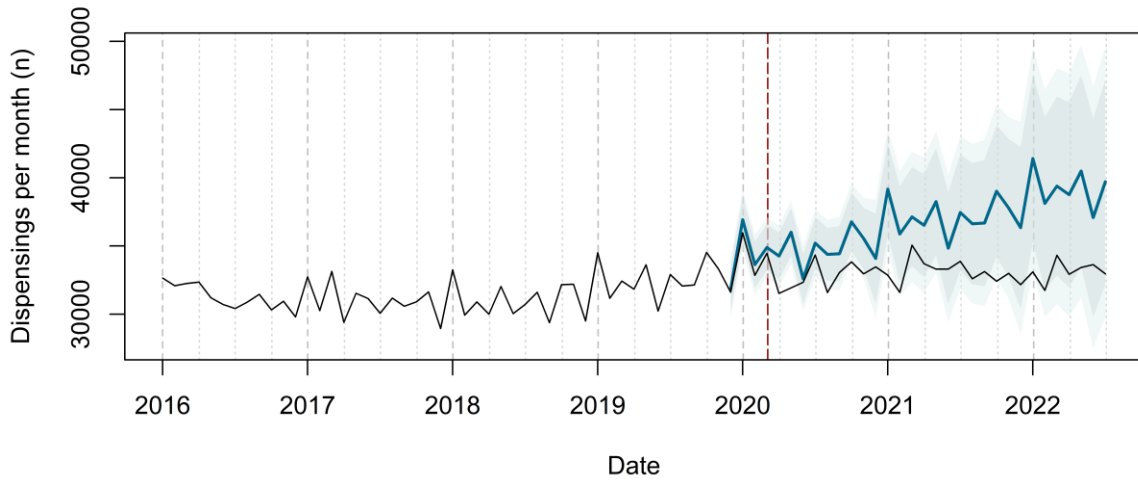

### Otologicals Dispensing Forecast

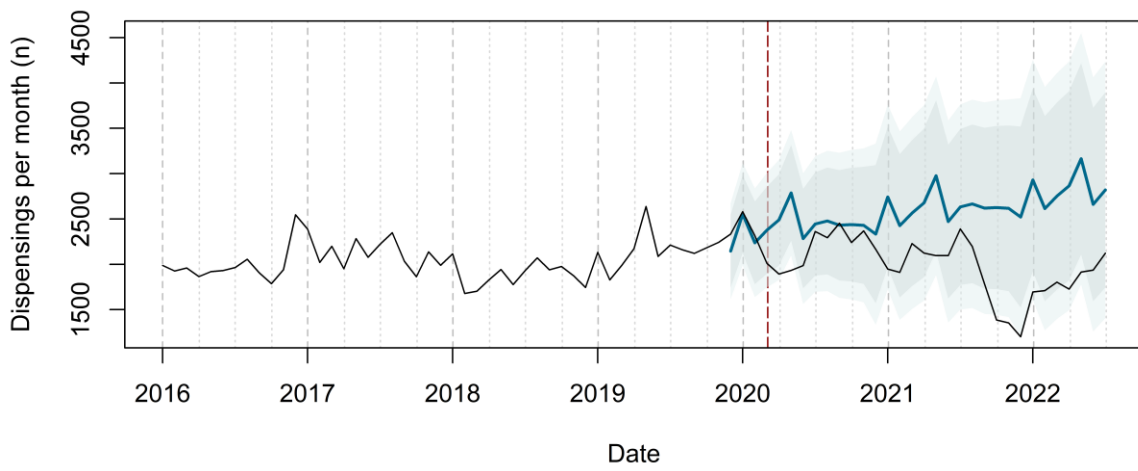

### Peripheral Vasodilators Dispensing Forecast

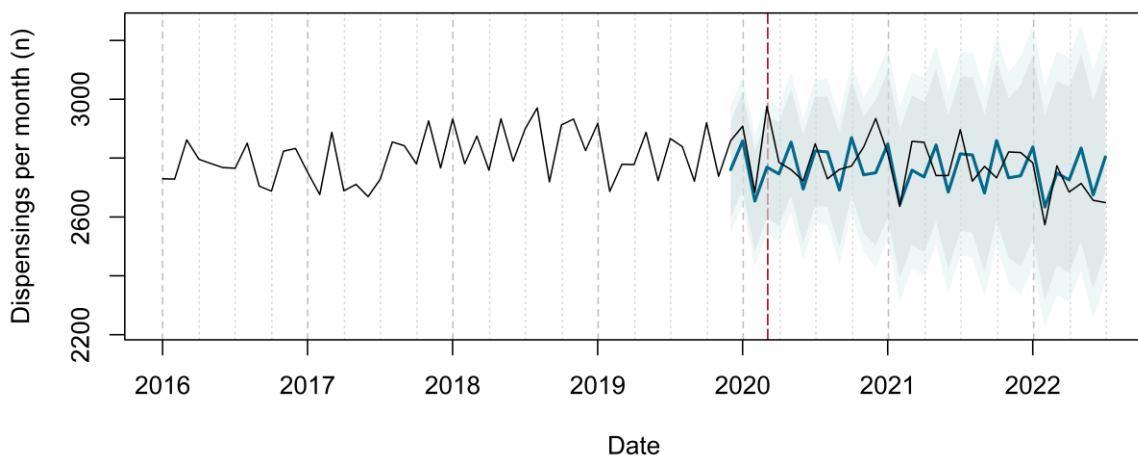

### Pituitary and Hypothalamic Hormones and Analogues Dispensing Forecast

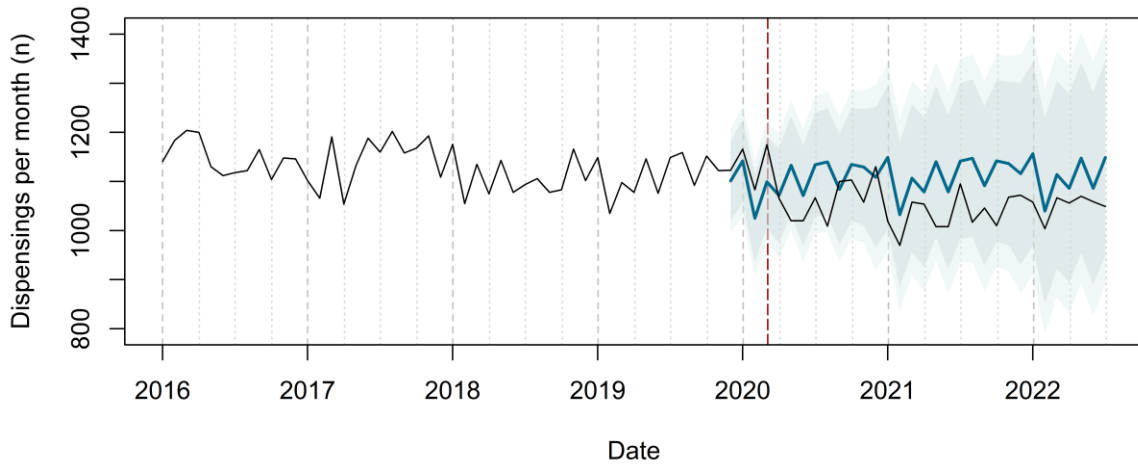

### Psychoanalectics Dispensing Forecast

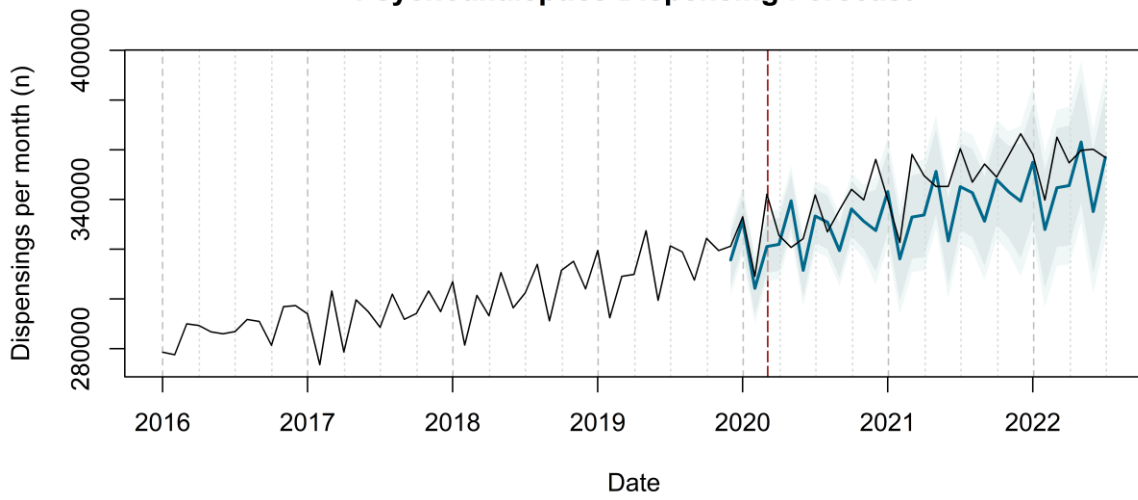

### Psycholeptics Dispensing Forecast

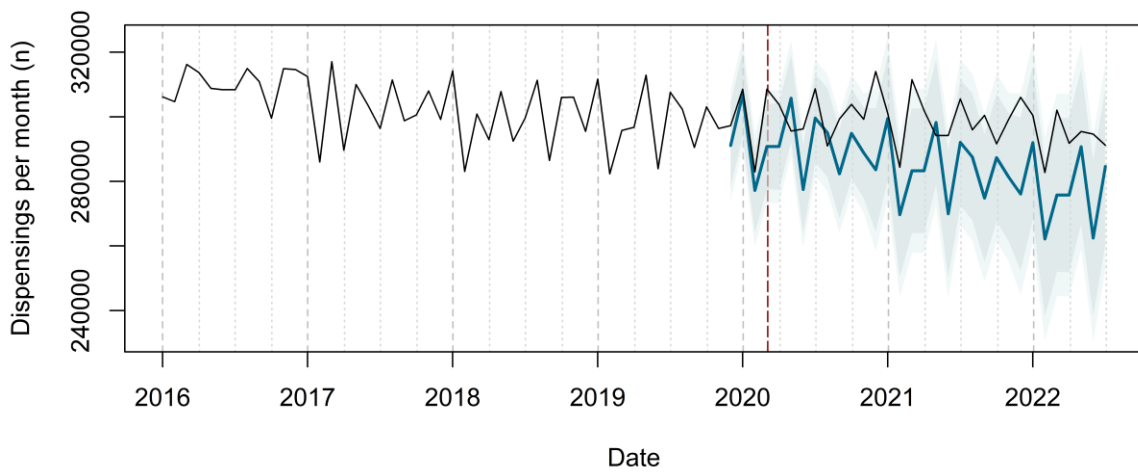

### Serum Lipid Reducing Agents Dispensing Forecast

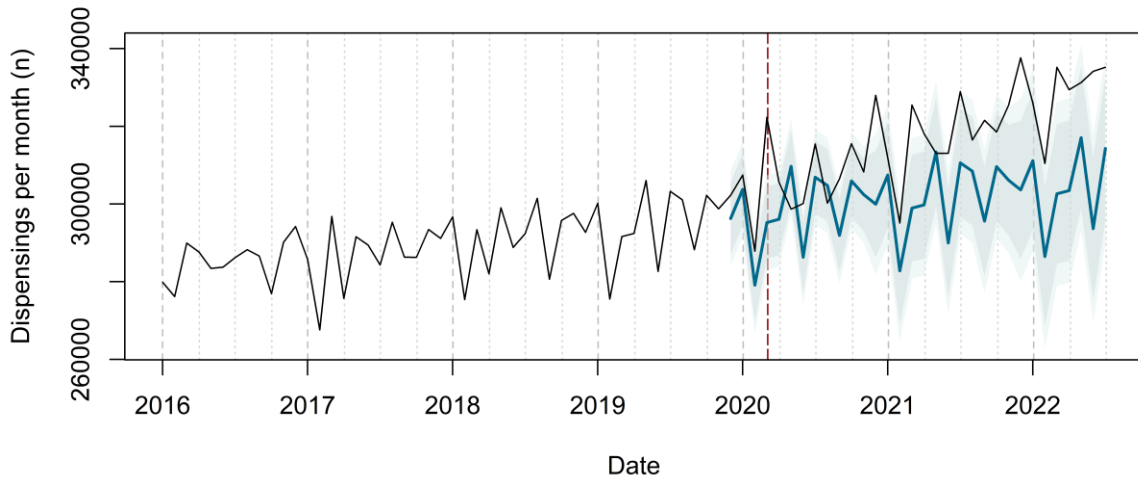

### Sex Hormones and Modulators of the Genital System Dispensing Forecast

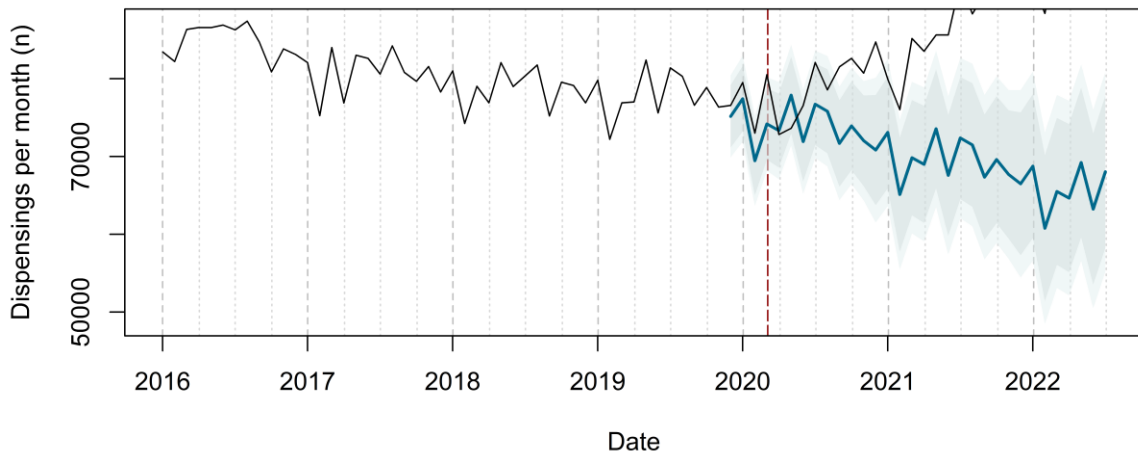

### Stomatological Preparations Dispensing Forecast

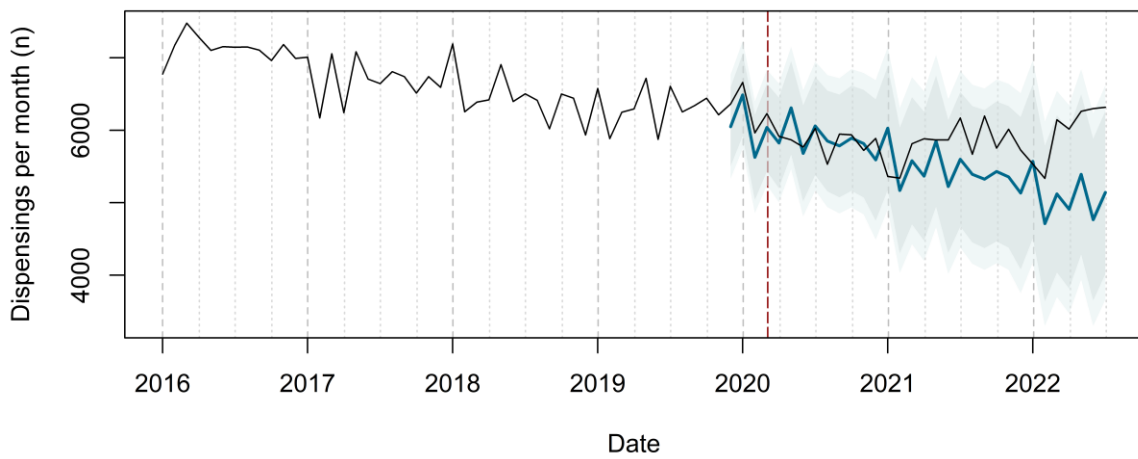



### Thyroid Therapy Dispensing Forecast

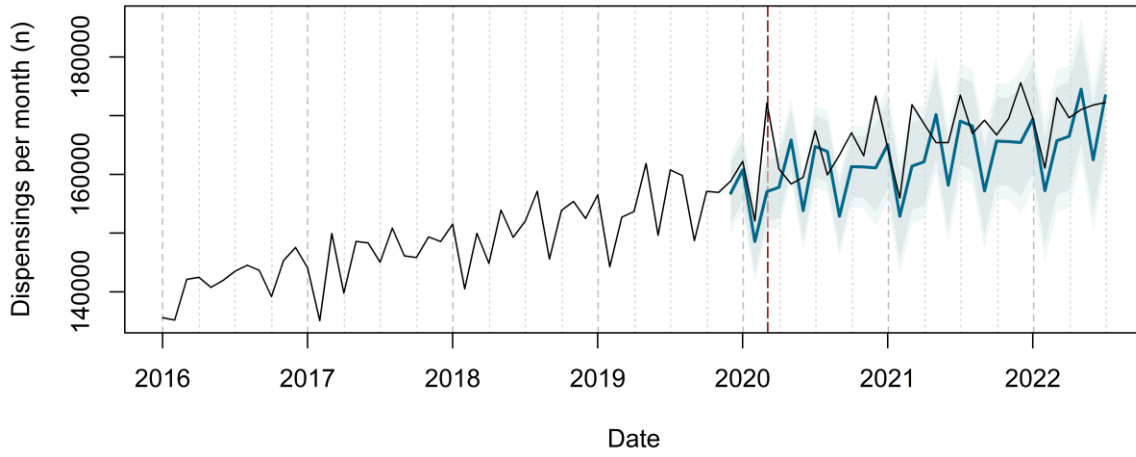

### Topical Products for Joint and Muscular Pain Dispensing Forecast

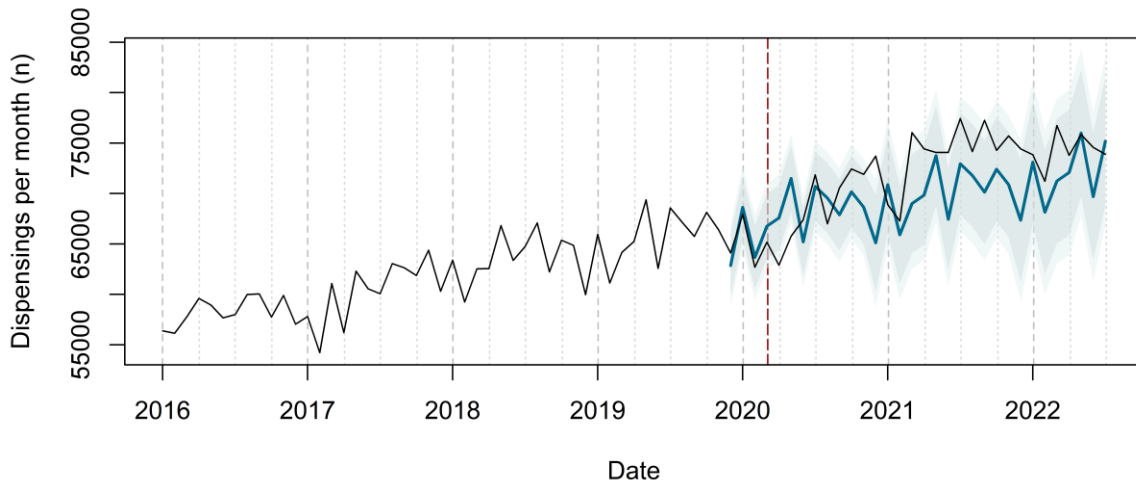

### Total Dispensing Forecast

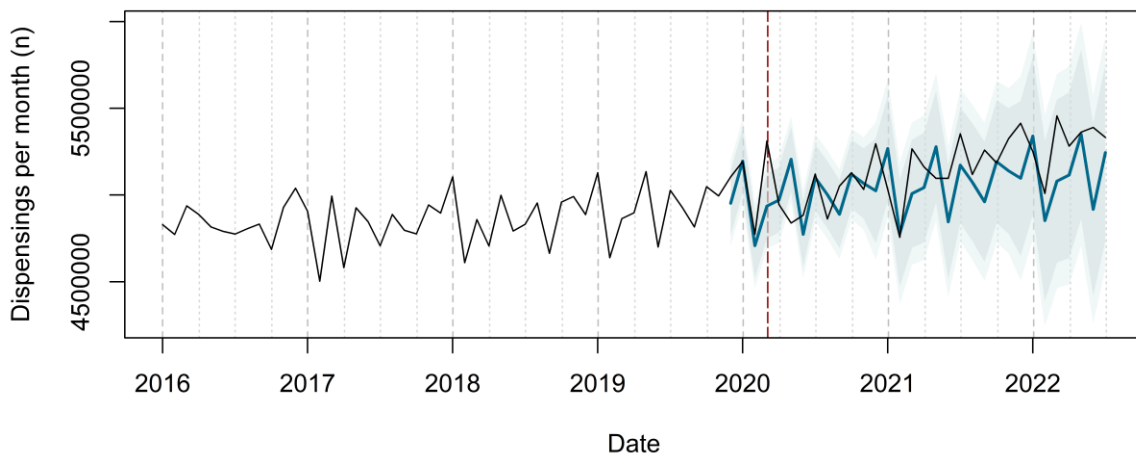

### Urinary Requisites Dispensing Forecast

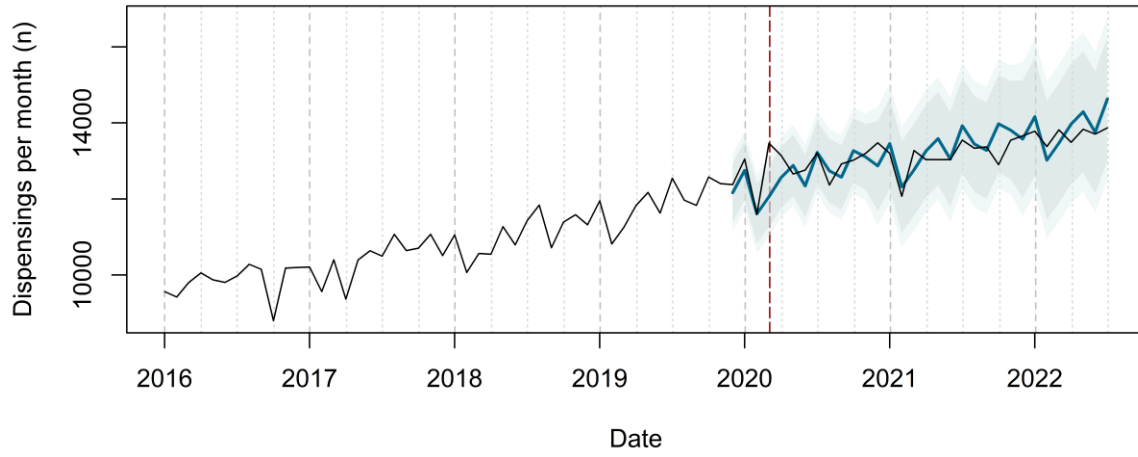

### Urologicals Dispensing Forecast

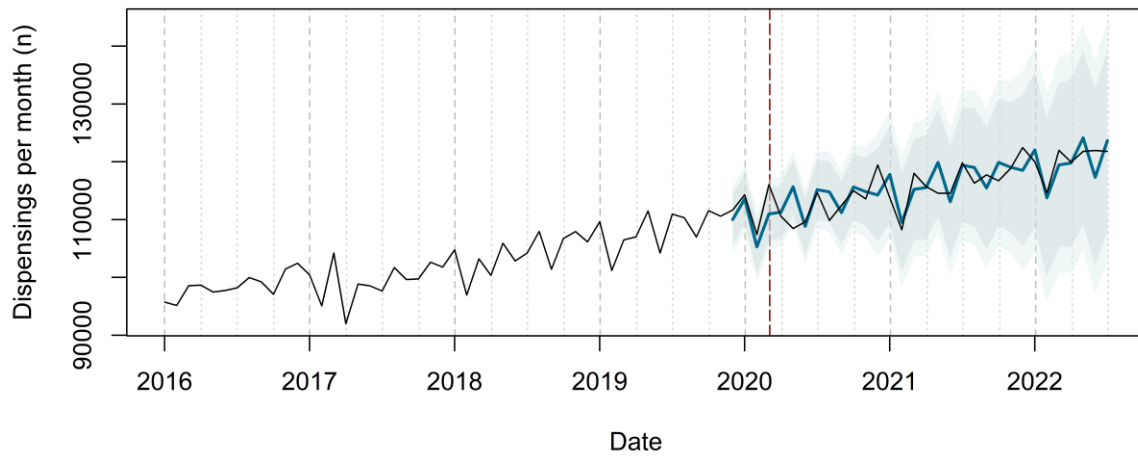

### Vasoprotectives Dispensing Forecast

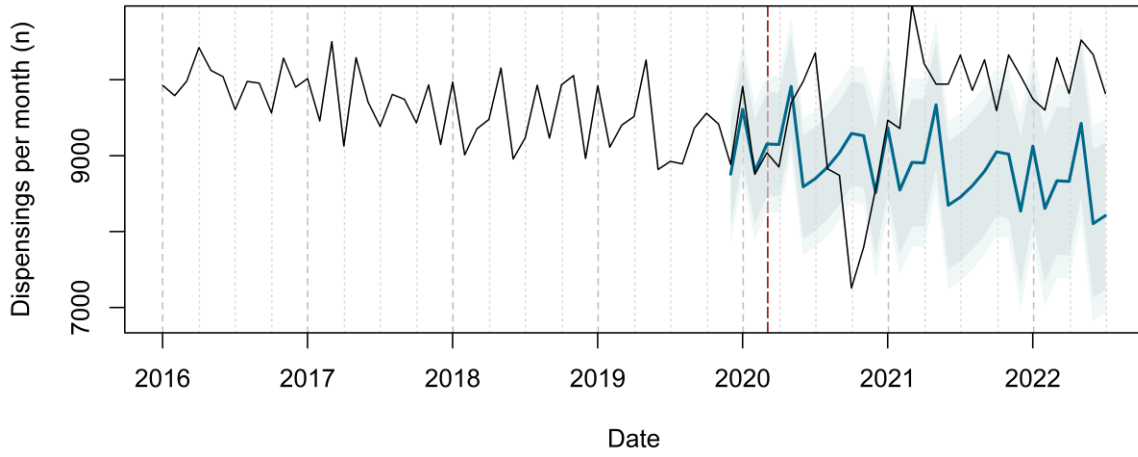

### Vitamins Dispensing Forecast

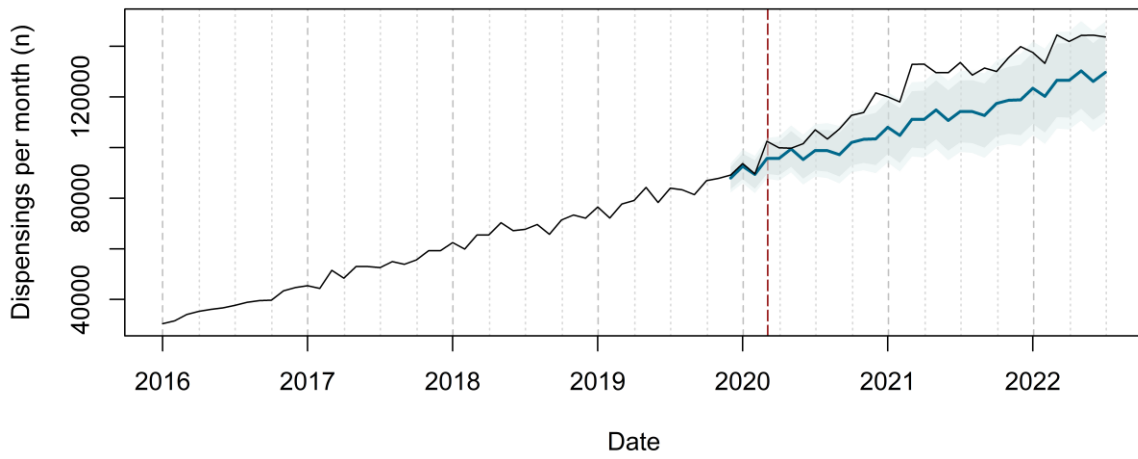

Supplement: Supplementary file [file media-3.pdf]
