# Supplementary material for: Trends in medication use after the onset of the COVID-19 pandemic in the Republic of Ireland: an interrupted time series study
Source: bioRxiv or medRxiv preprint supplement (doi:10.1101/2023.06.09.23291202), 2023-06-12

## Trends in medication use after the onset of the COVID-19 pandemic in the Republic of Ireland: an interrupted time series study

**Supplementary figure 1.** Actual dispensing (black) and forecasted dispensing (blue, with 95% and 99% prediction intervals) for all therapeutic subgroups

*Therapeutic subgroups appear in alphabetical order by subgroup name*

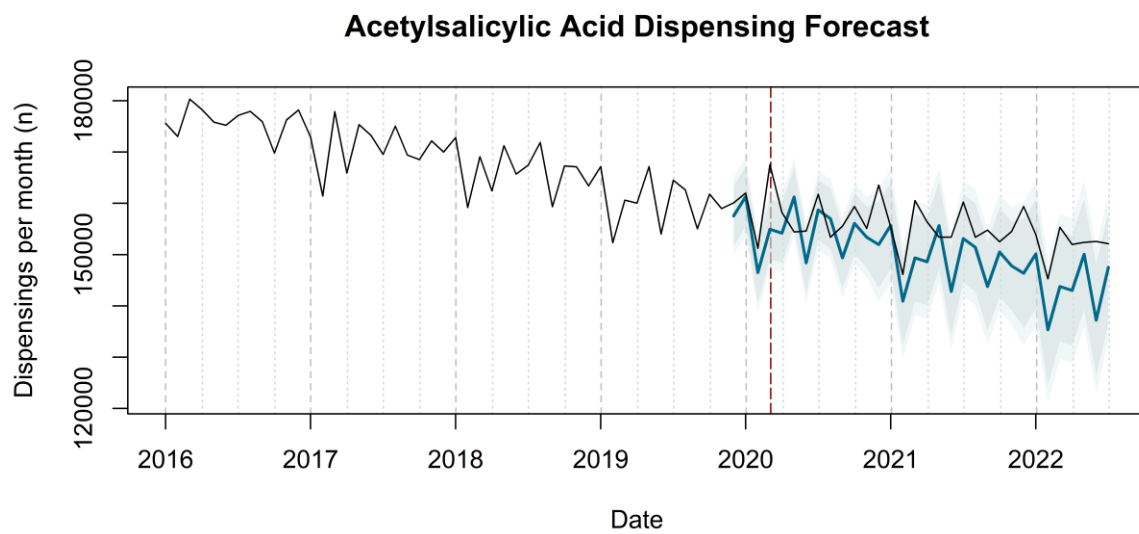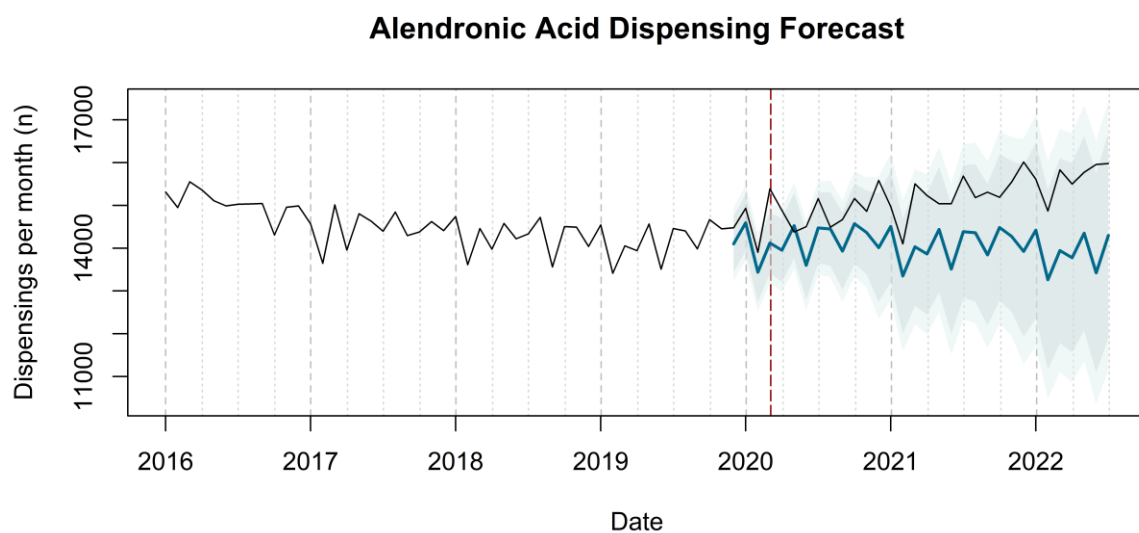

### Alginic Acid Dispensing Forecast

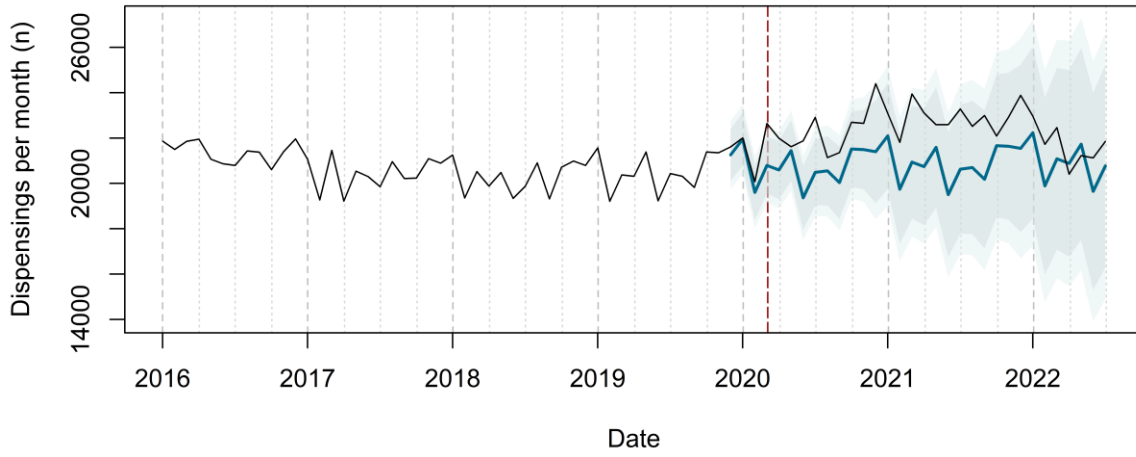

### Allopurinol Dispensing Forecast

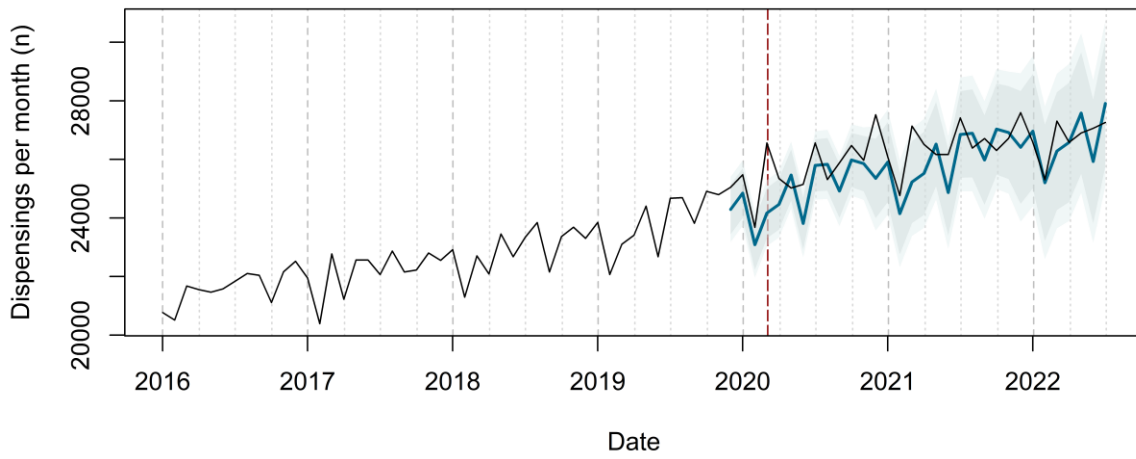

### Alprazolam Dispensing Forecast

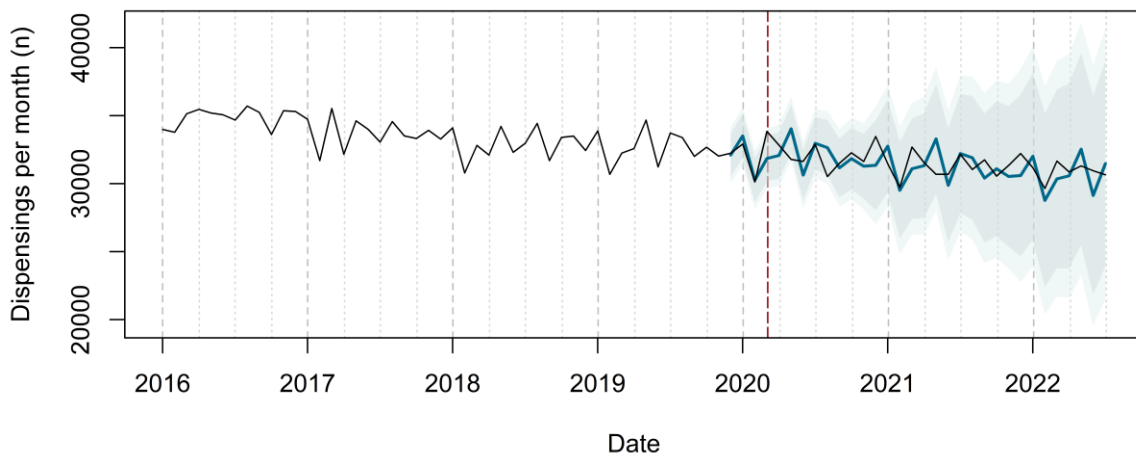

### Amitriptyline Dispensing Forecast

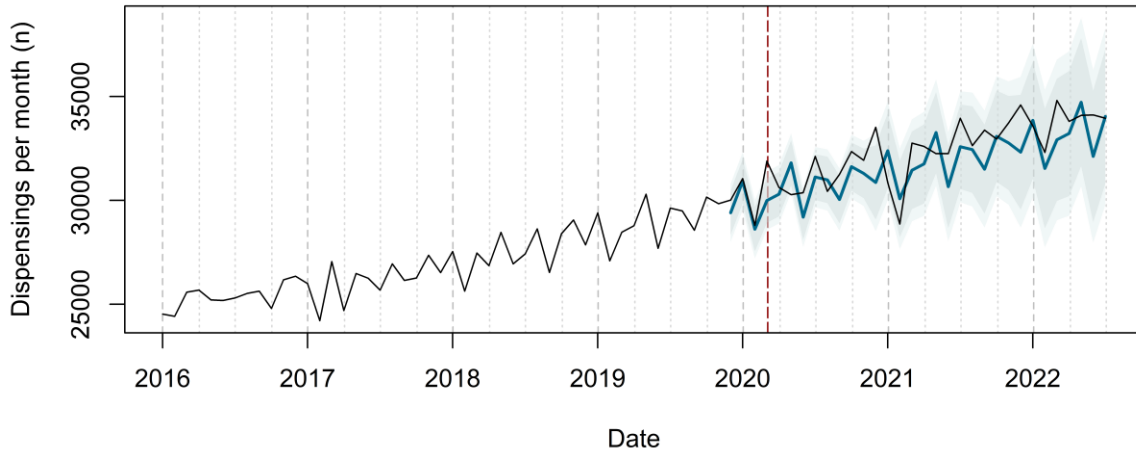

### Amlodipine Dispensing Forecast

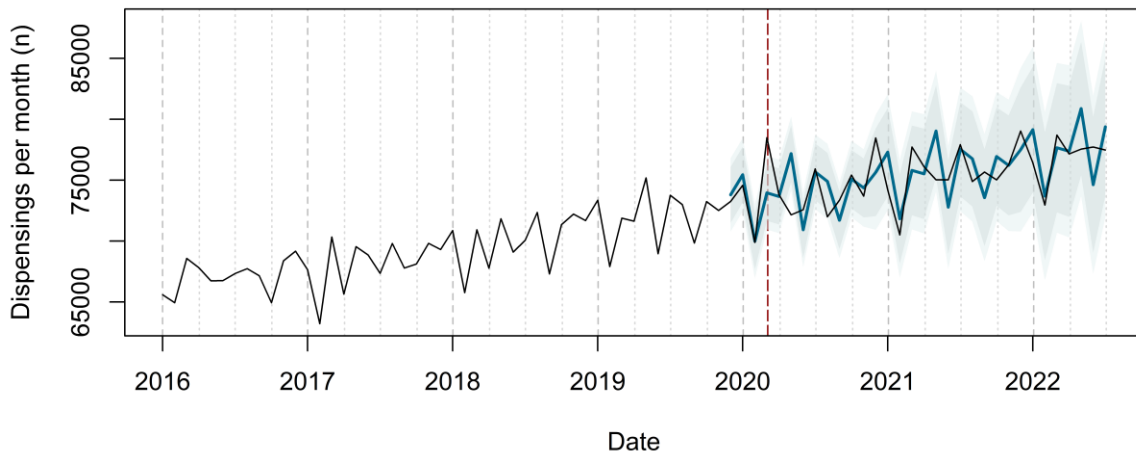

### Amoxicillin and Beta-Lactamase Inhibitor Dispensing Forecast

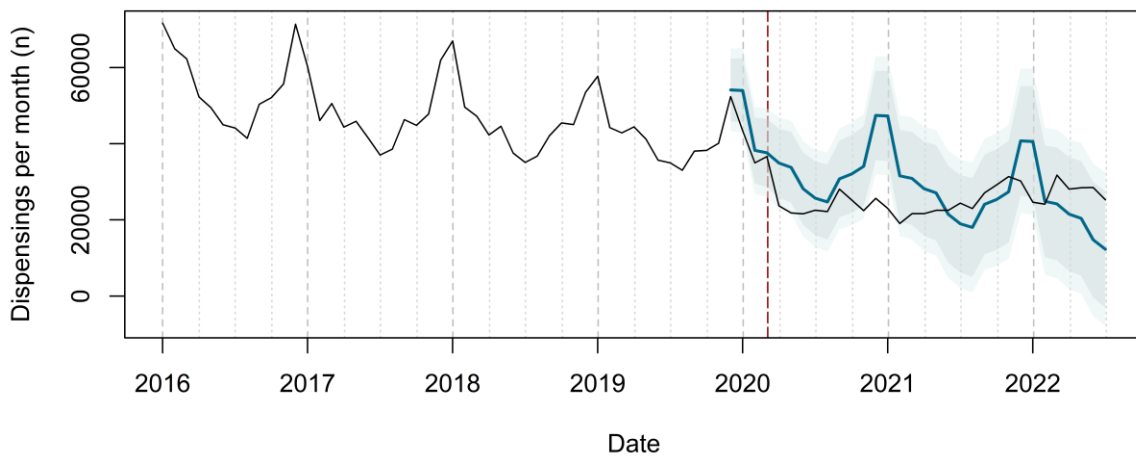

### Amoxicillin Dispensing Forecast

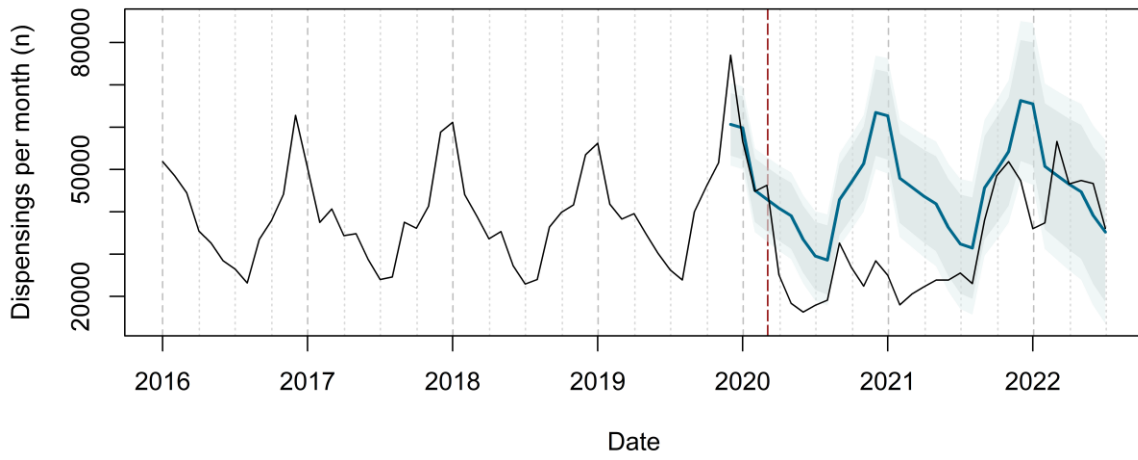

### Artificial Tears and Other Indifferent Preparations Dispensing Forecast

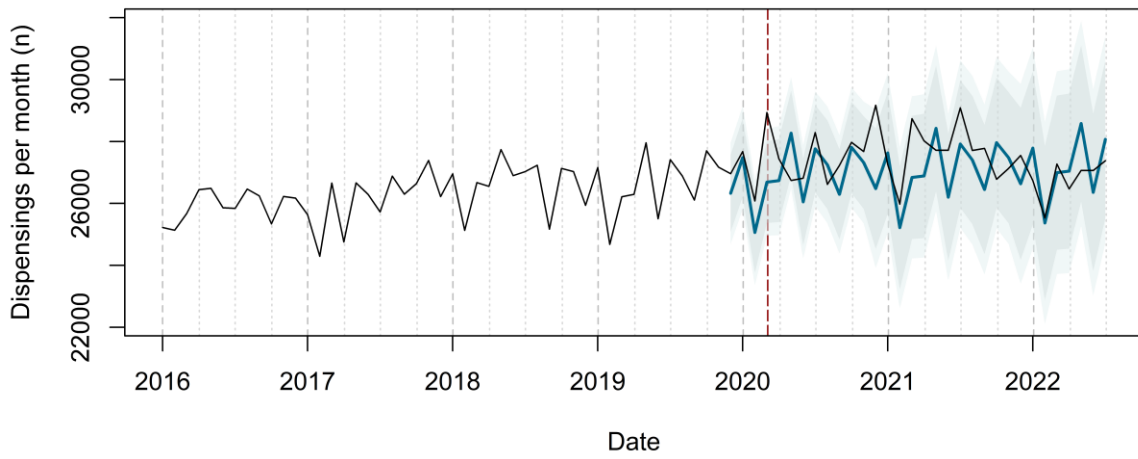

### Atenolol Dispensing Forecast

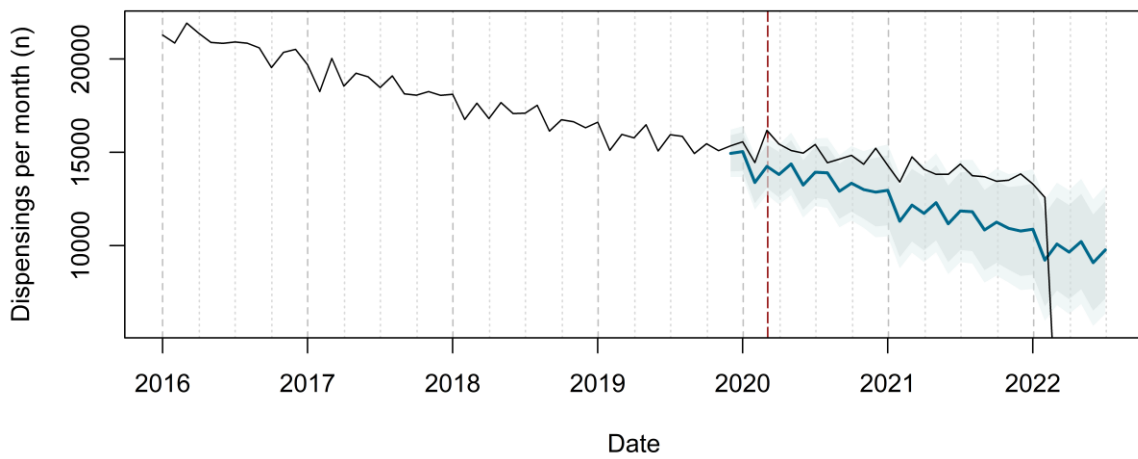

**Atorvastatin Dispensing Forecast**

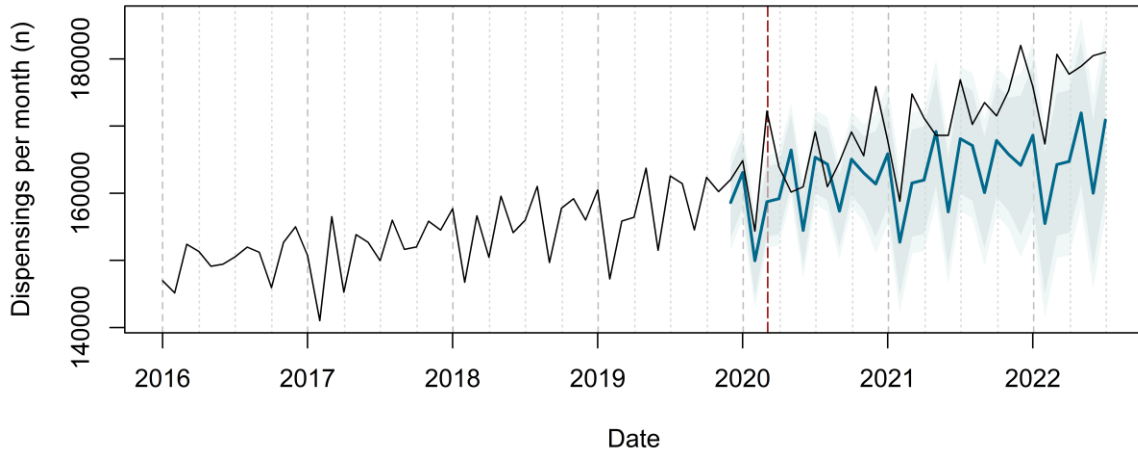

**Beclometasone (Inhaled) Dispensing Forecast**

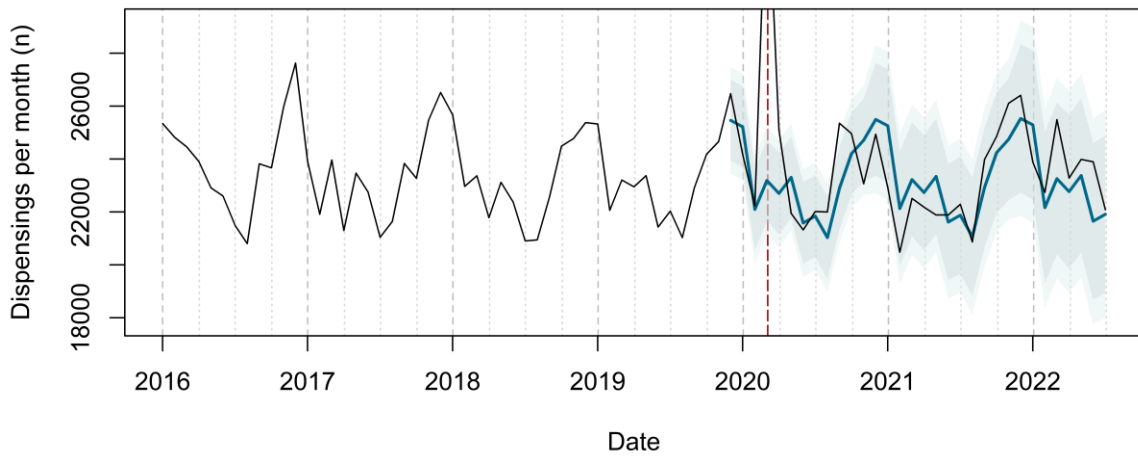

**Betahistine Dispensing Forecast**

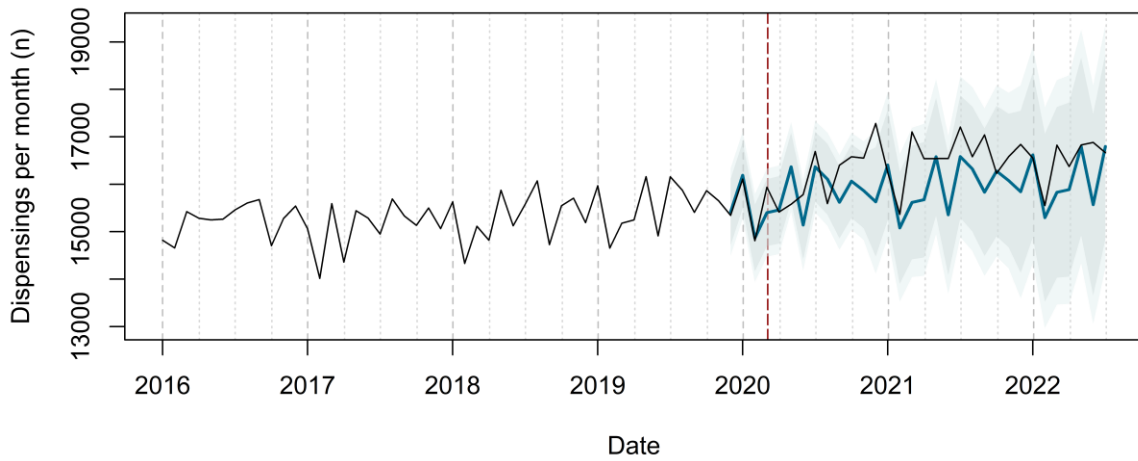

### Betamethasone (Topical) Dispensing Forecast

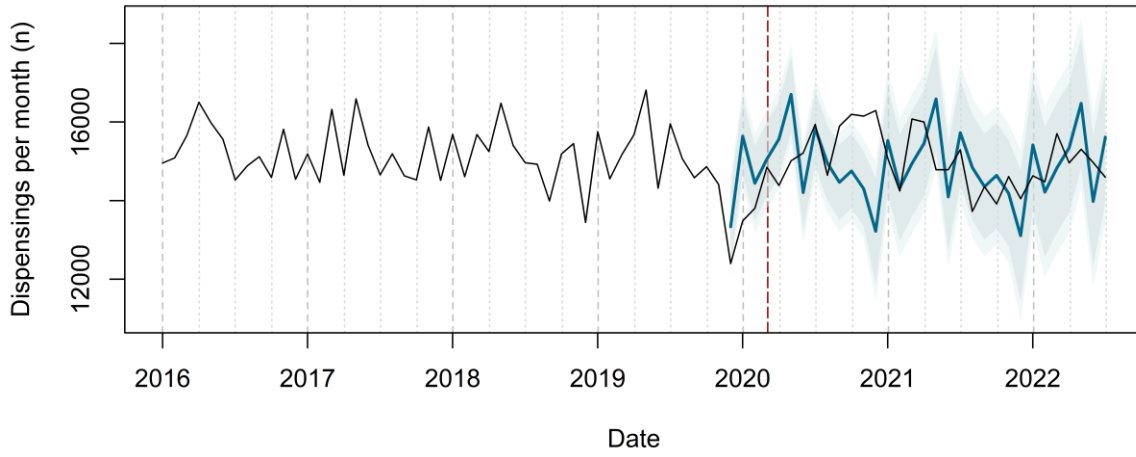

### Bisoprolol Dispensing Forecast

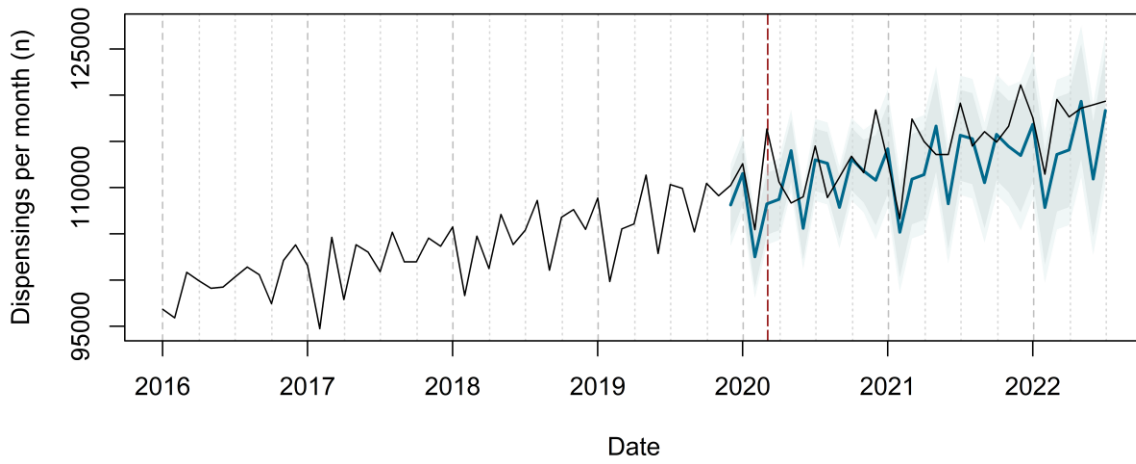

### Calcium Carbonate and Colecalciferol Dispensing Forecast

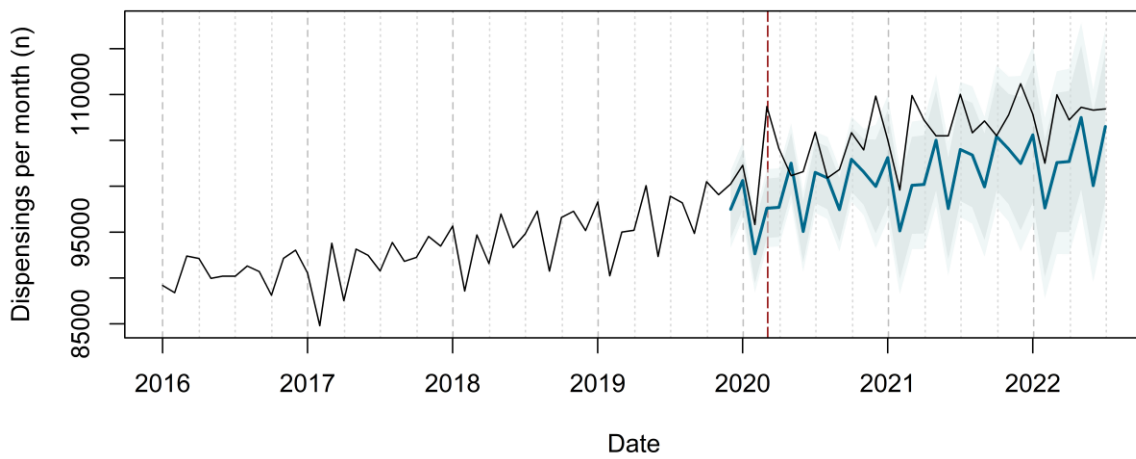

### Carbocisteine Dispensing Forecast

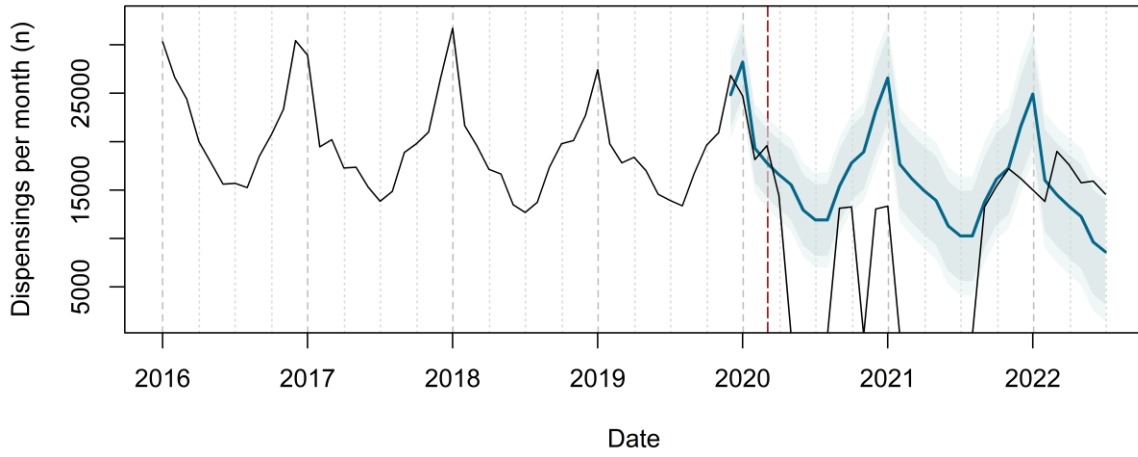

### Cetirizine Dispensing Forecast

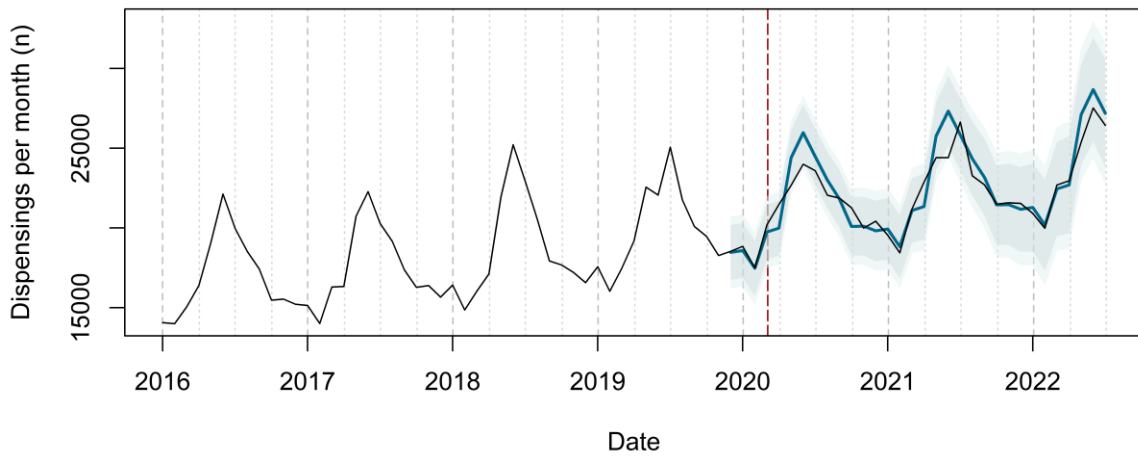

### Citalopram Dispensing Forecast

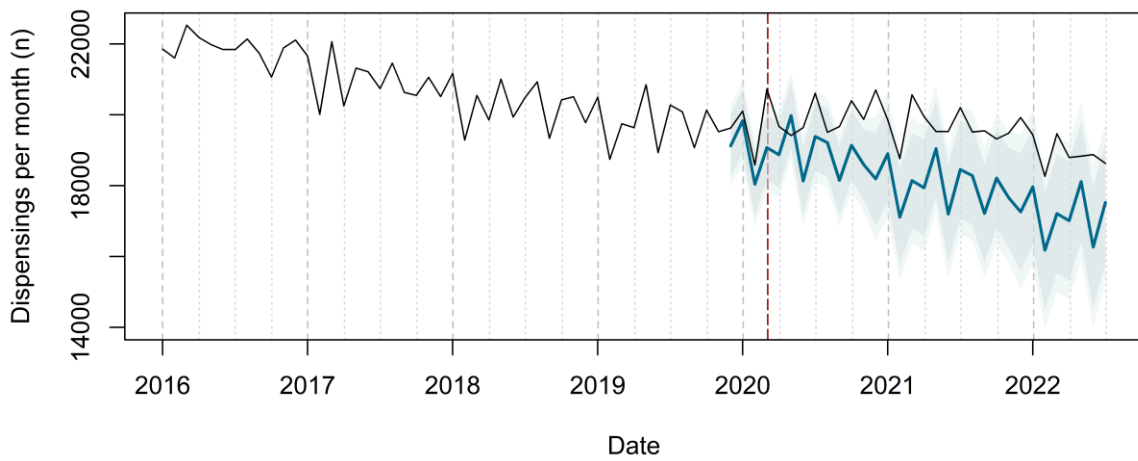

### Clinical Nutritional Products Dispensing Forecast

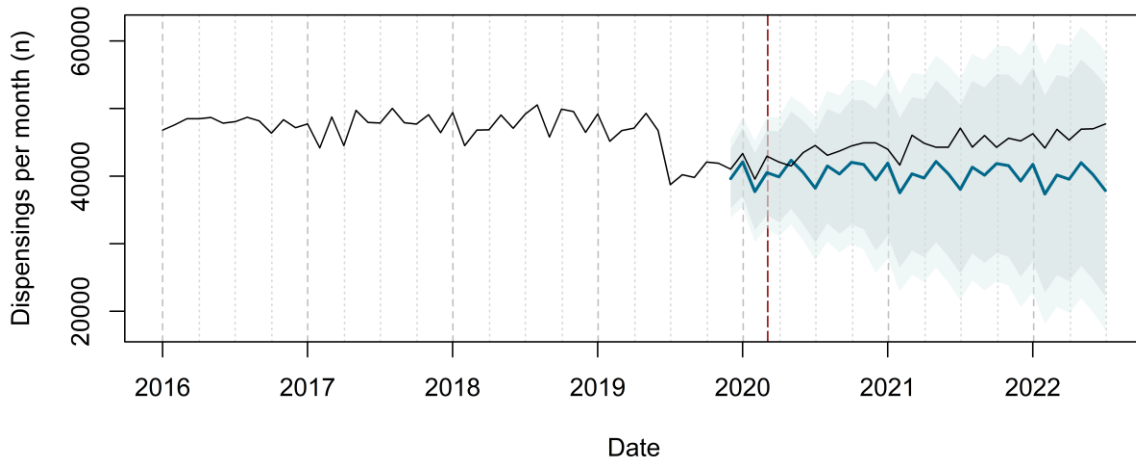

### Clopidogrel Dispensing Forecast

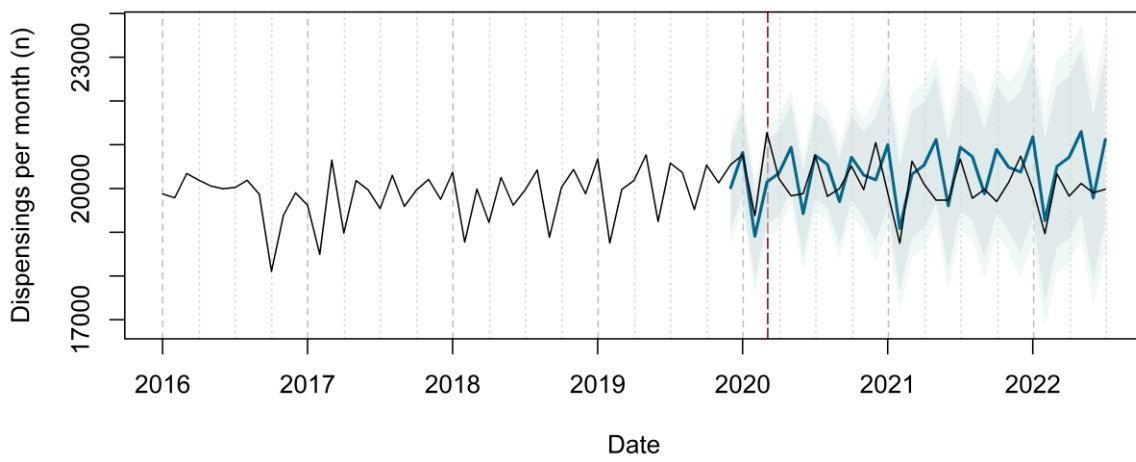

### Codeine Combinations excl. Psycholeptics Dispensing Forecast

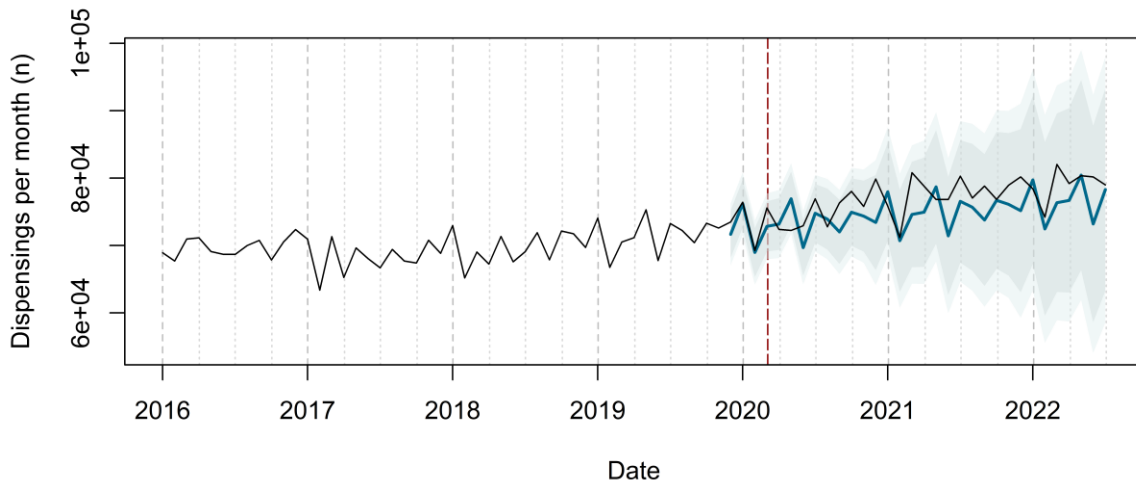



### Colecalciferol Dispensing Forecast

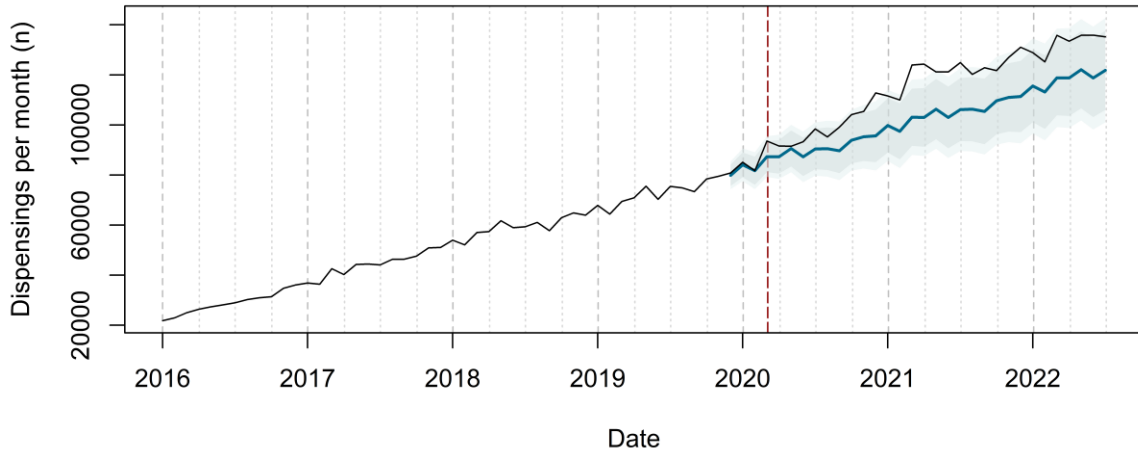

### Diazepam Dispensing Forecast

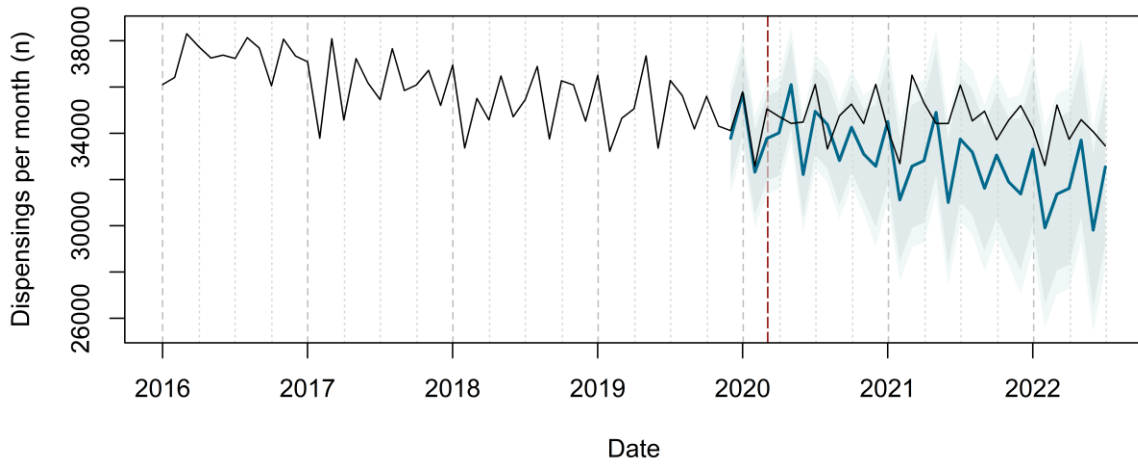

### Diclofenac (Systemic) Dispensing Forecast

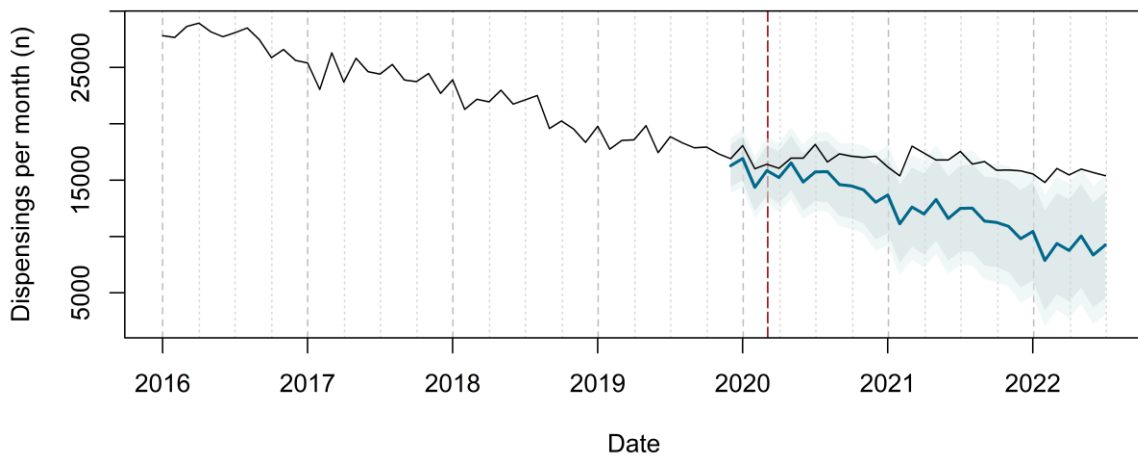

**Diclofenac (Topical) Dispensing Forecast**

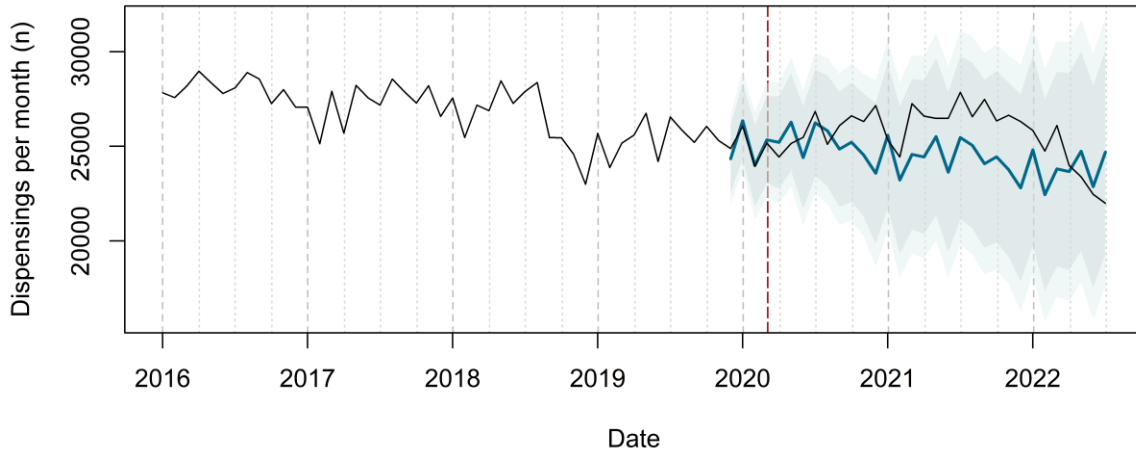

**Doxazosin Dispensing Forecast**

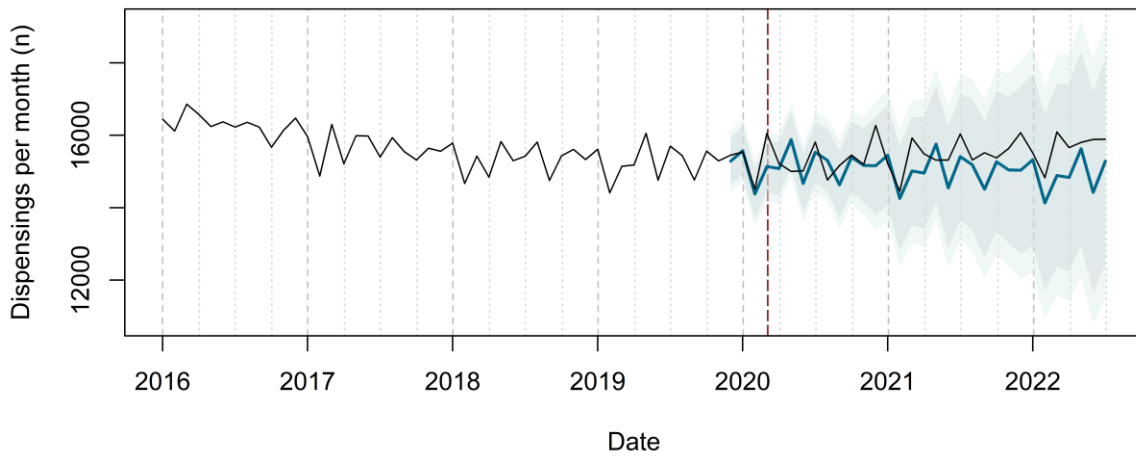

**Escitalopram Dispensing Forecast**

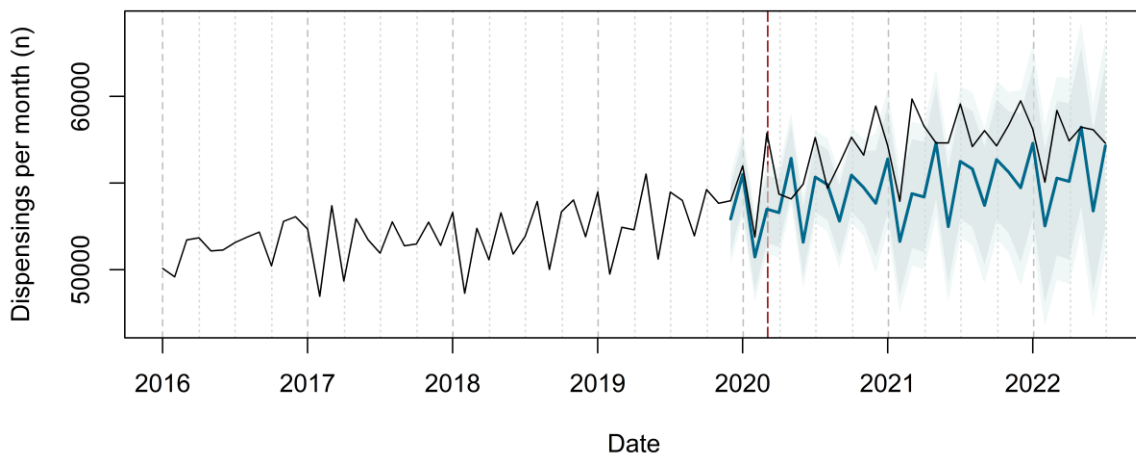

### Esomeprazole Dispensing Forecast

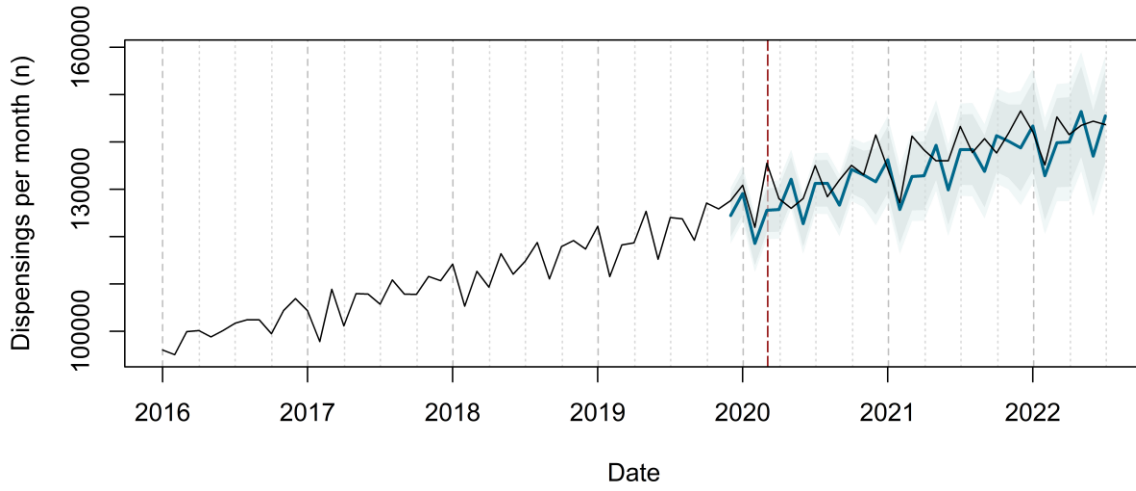

### Etofenamate (Topical) Dispensing Forecast

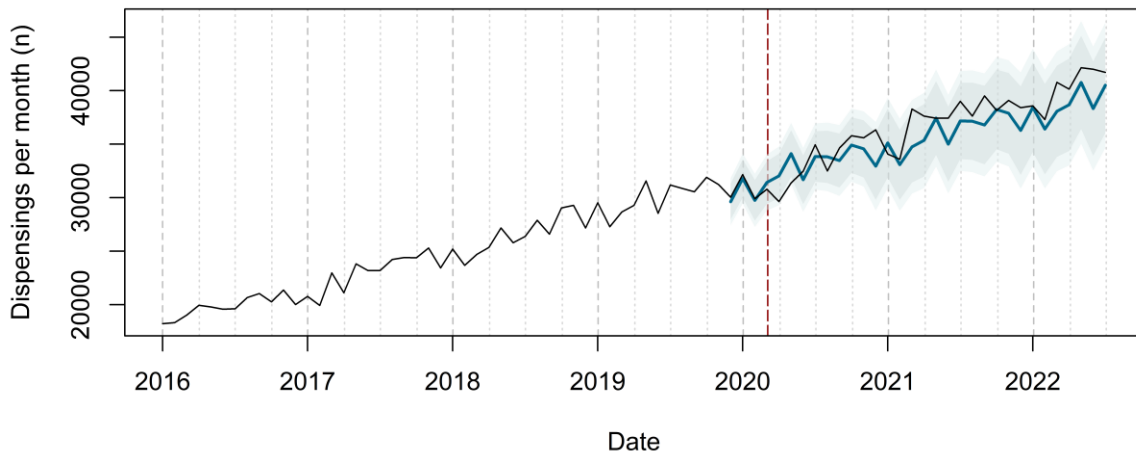

### Ferrous Fumarate Dispensing Forecast

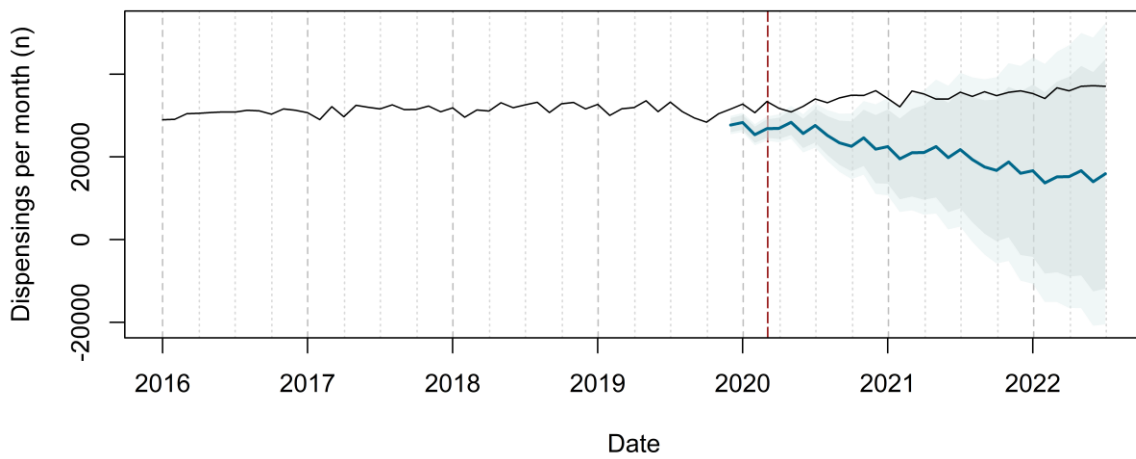

### Flucloxacillin Dispensing Forecast

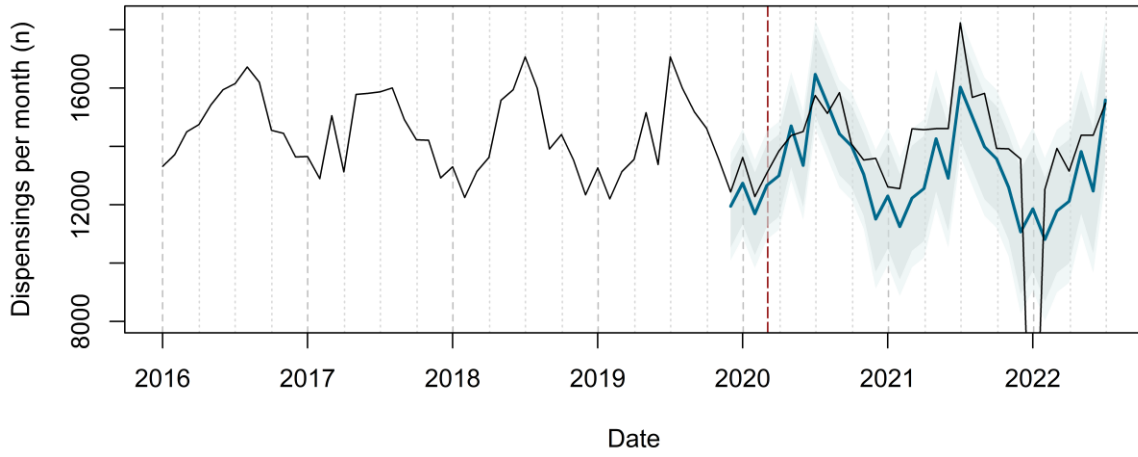

### Fluoxetine Dispensing Forecast

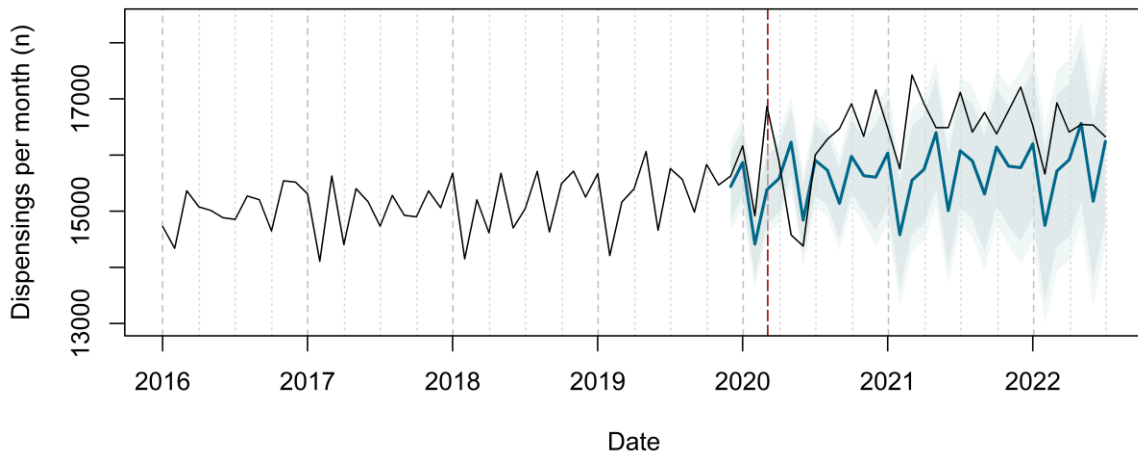

### Fluticasone Furoate Dispensing Forecast

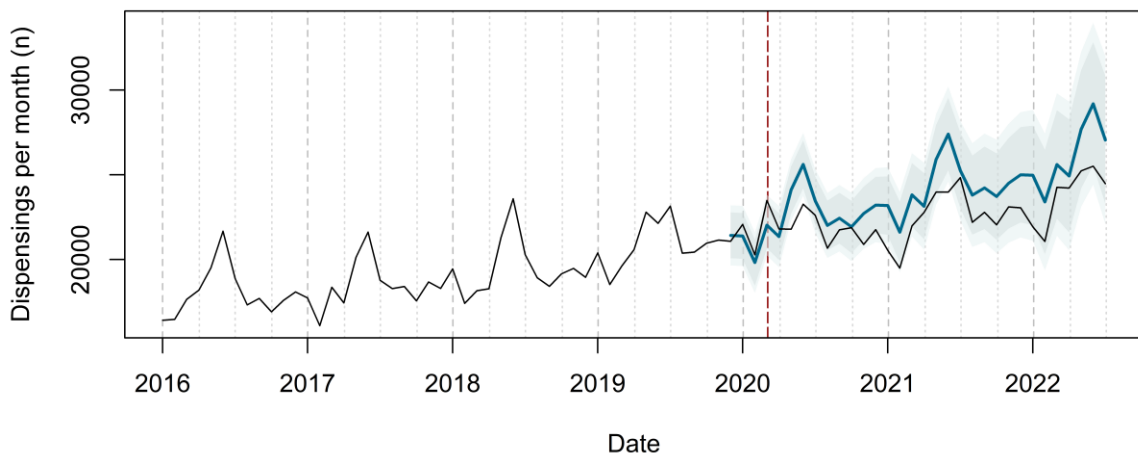

**Folic Acid Dispensing Forecast**

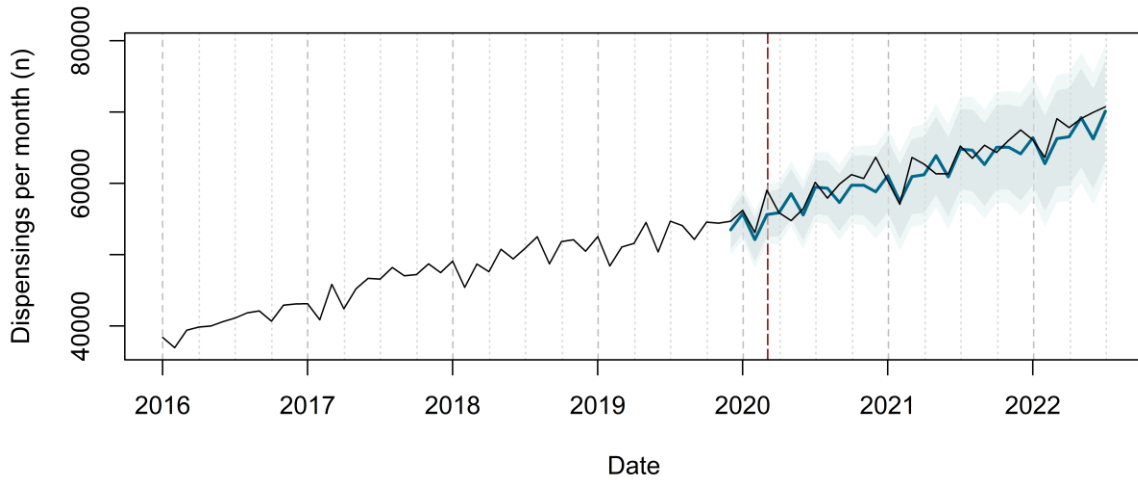

**Formoterol and Budesonide Dispensing Forecast**

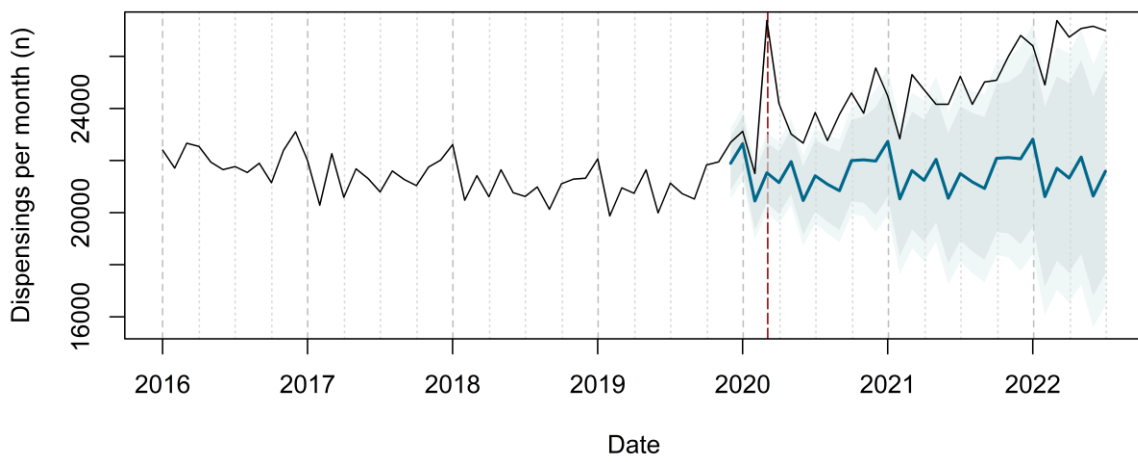

**Furosemide Dispensing Forecast**

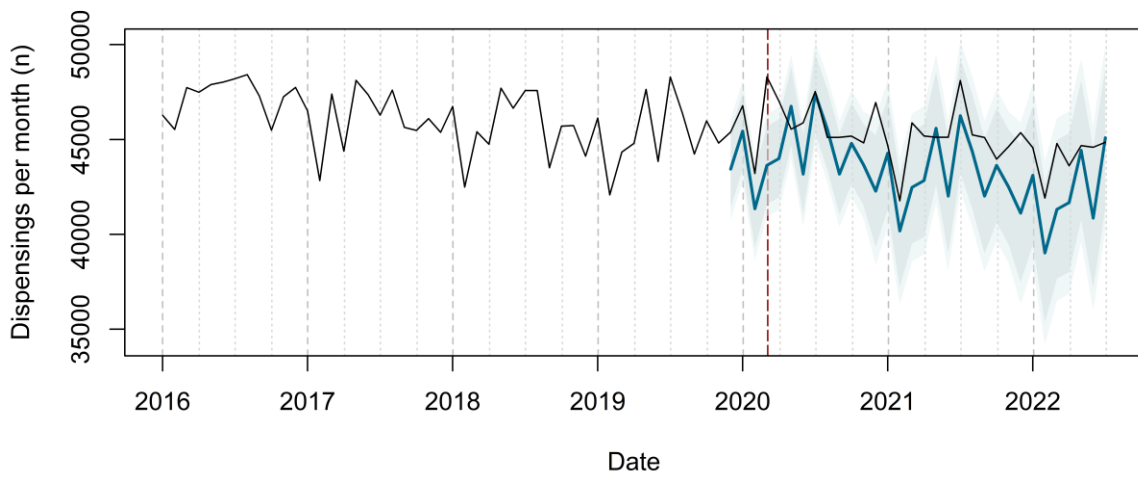

**Ibuprofen Dispensing Forecast**

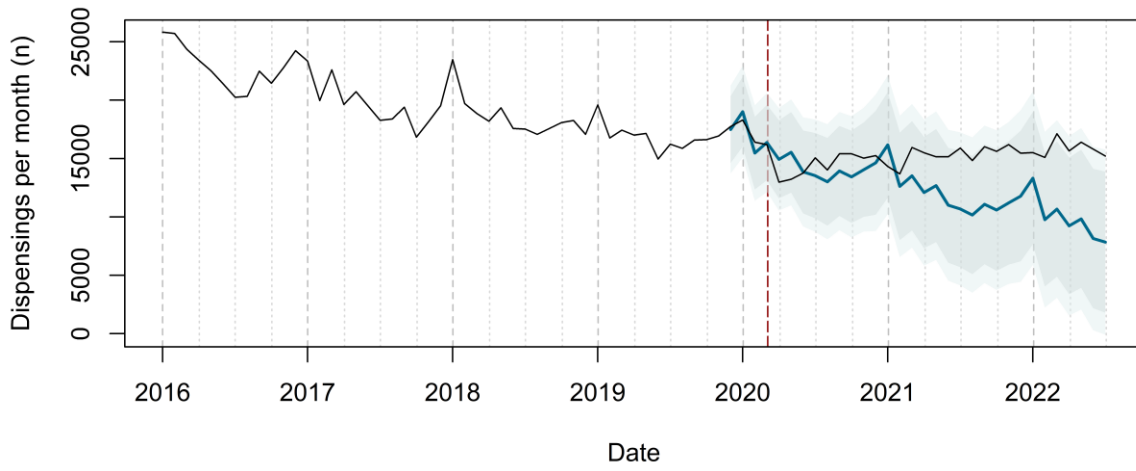

**Imidazoles/Triazoles in Combination With Corticosteroids Dispensing Forecast**

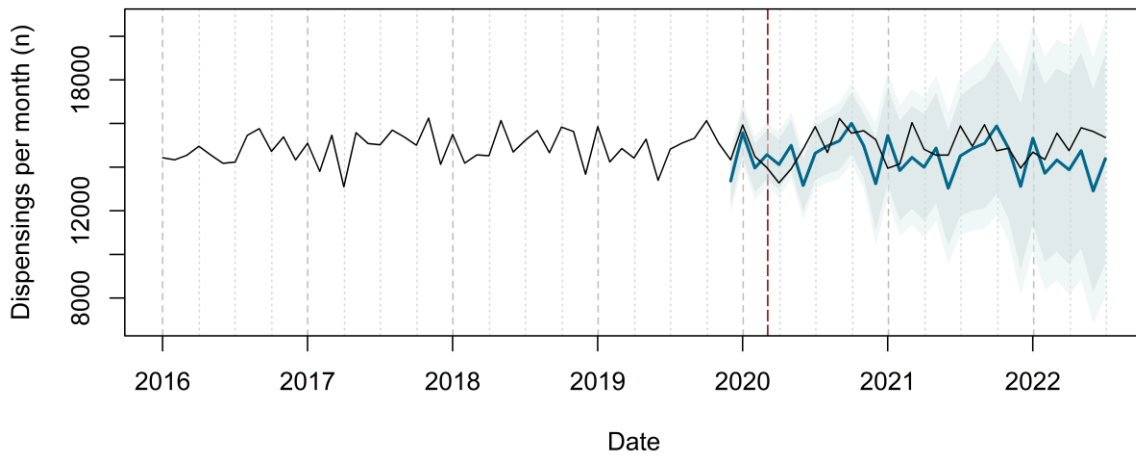

**Lactulose Dispensing Forecast**

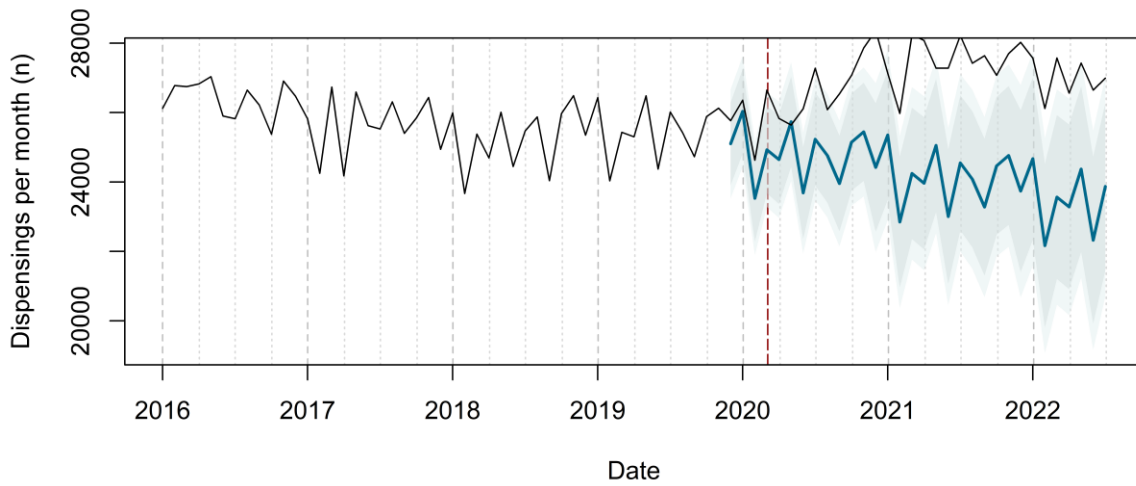

### Lansoprazole Dispensing Forecast

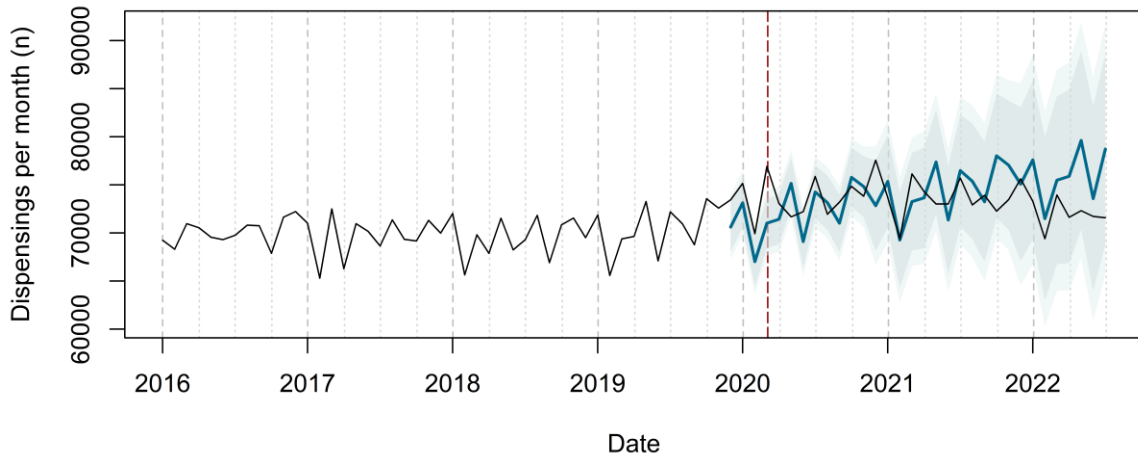

### Latanoprost Dispensing Forecast

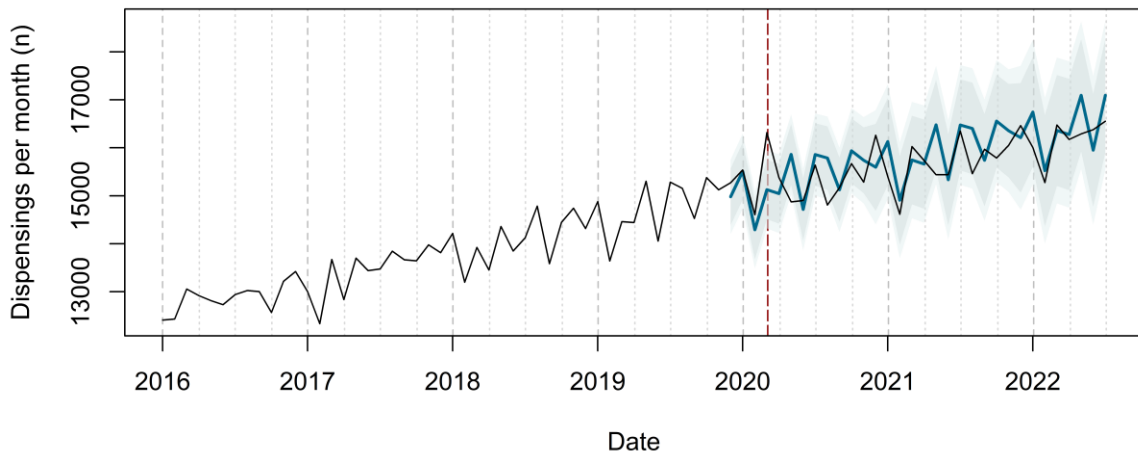

### Lercanidipine Dispensing Forecast

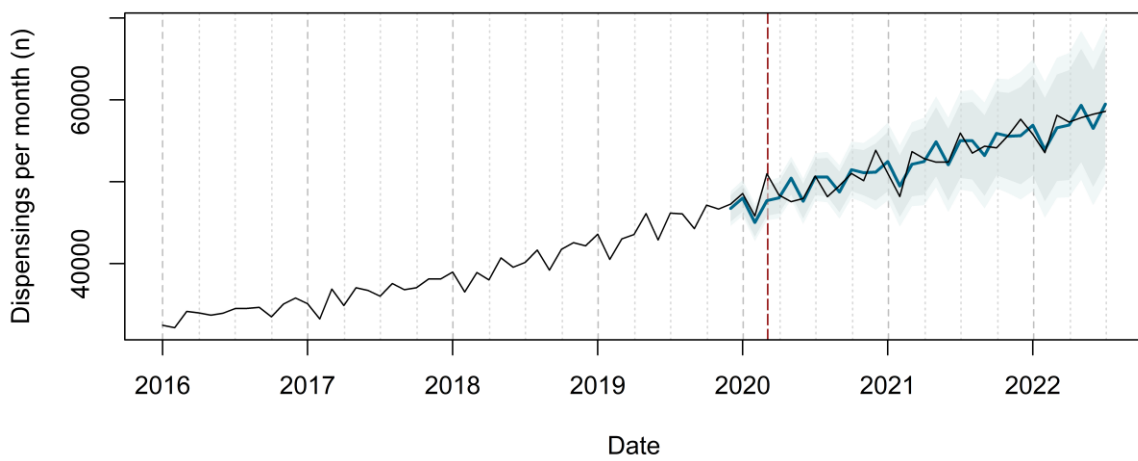

### Levonorgestrel and Ethinylestradiol Dispensing Forecast

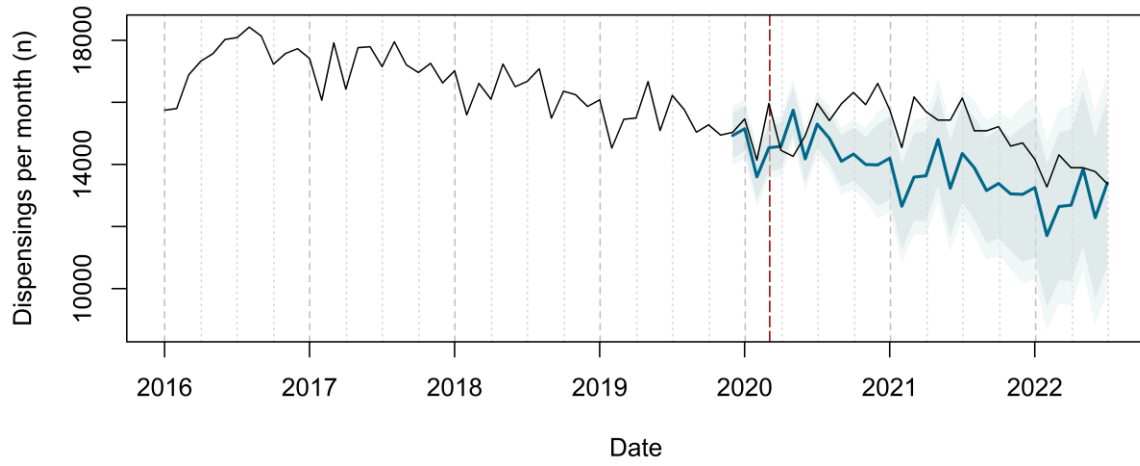

### Levothyroxine Sodium Dispensing Forecast

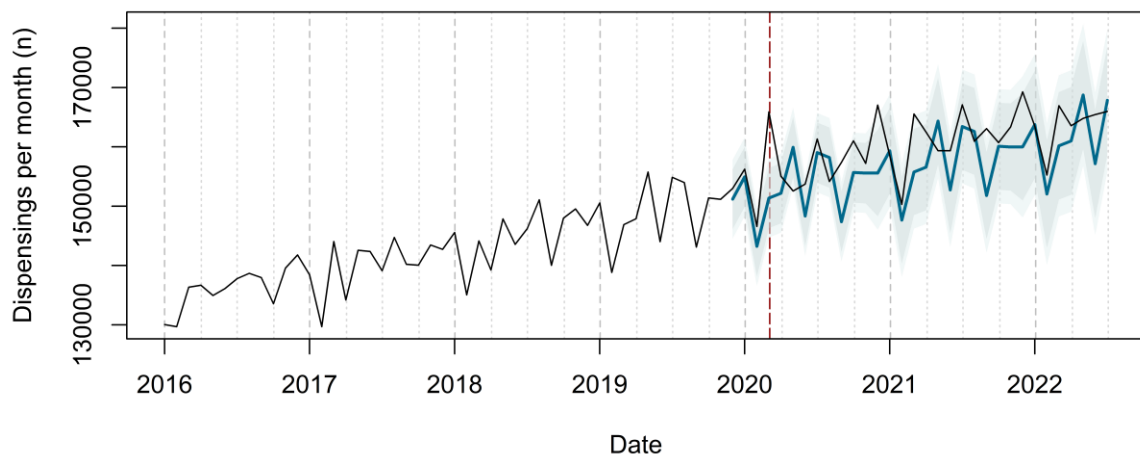



### Losartan Dispensing Forecast

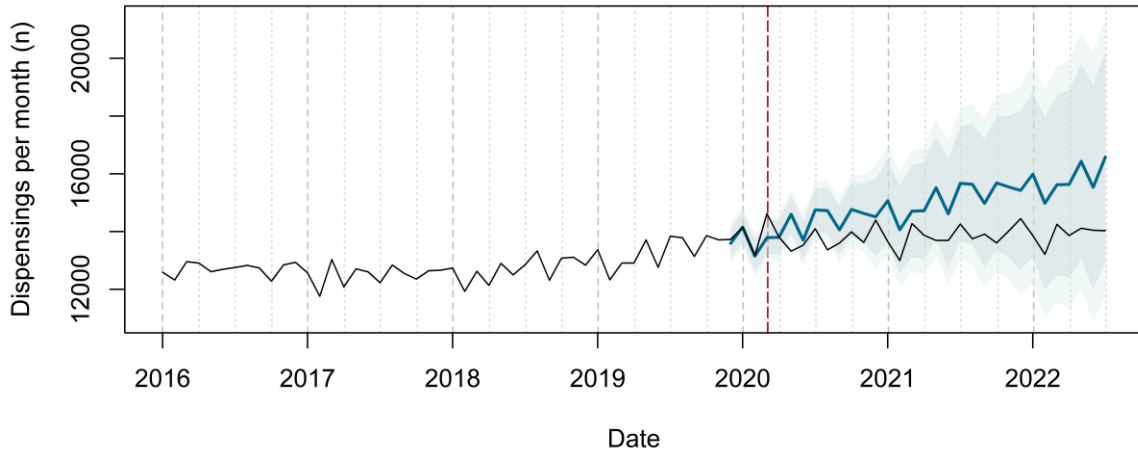

### Metformin Dispensing Forecast

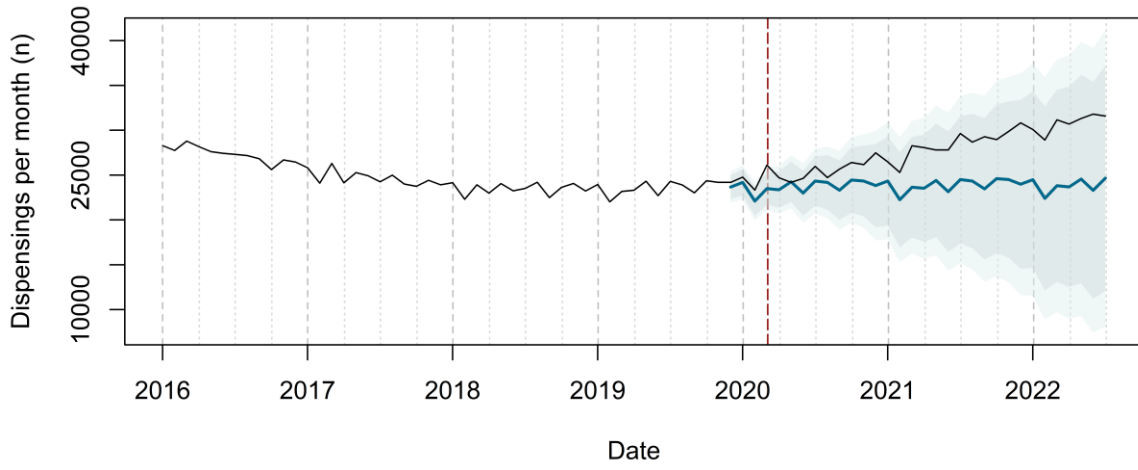

### Mirtazapine Dispensing Forecast

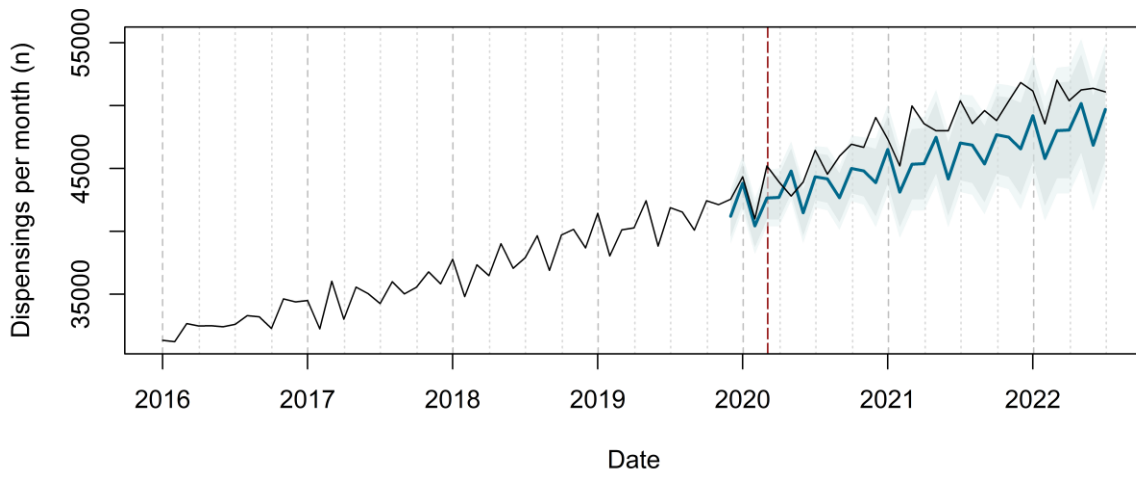

### Montelukast Dispensing Forecast

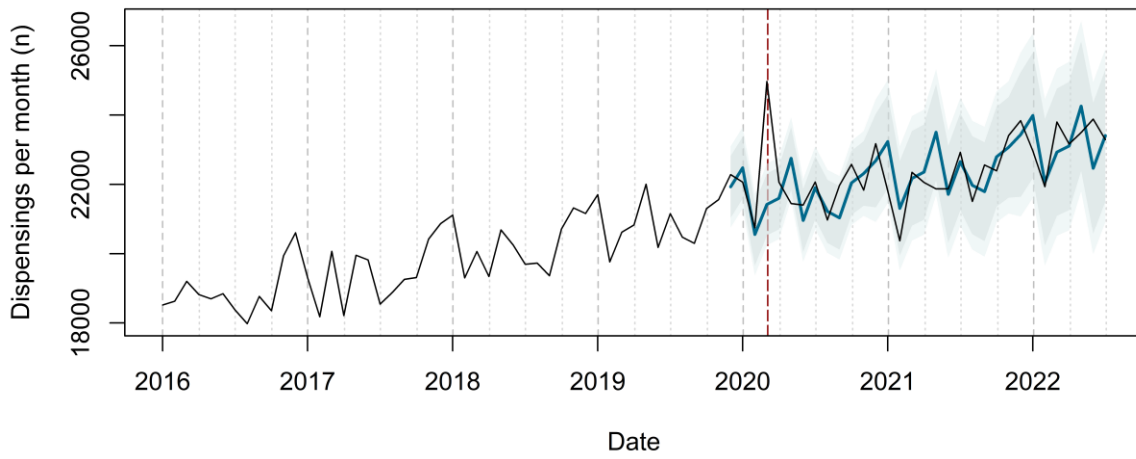

### Naproxen and Esomeprazole Dispensing Forecast

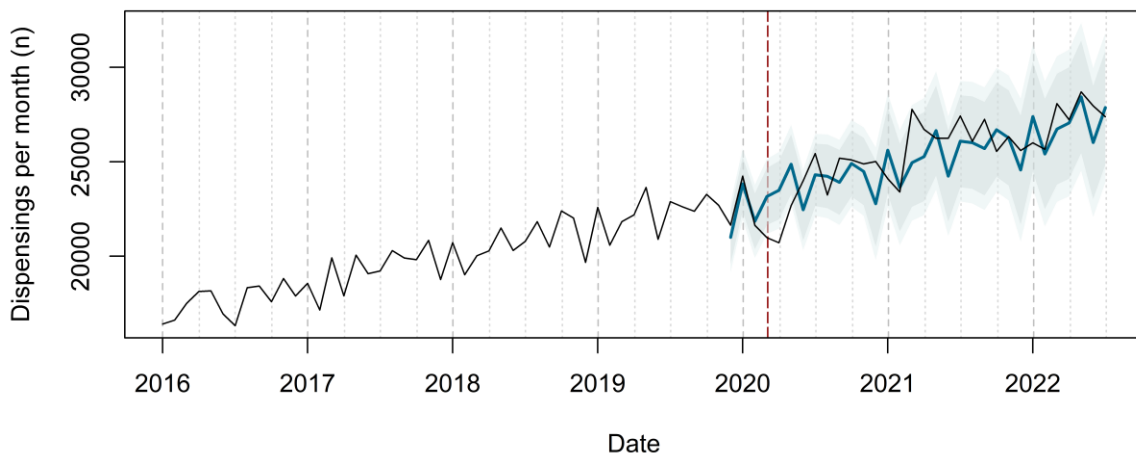

### Nebivolol Dispensing Forecast

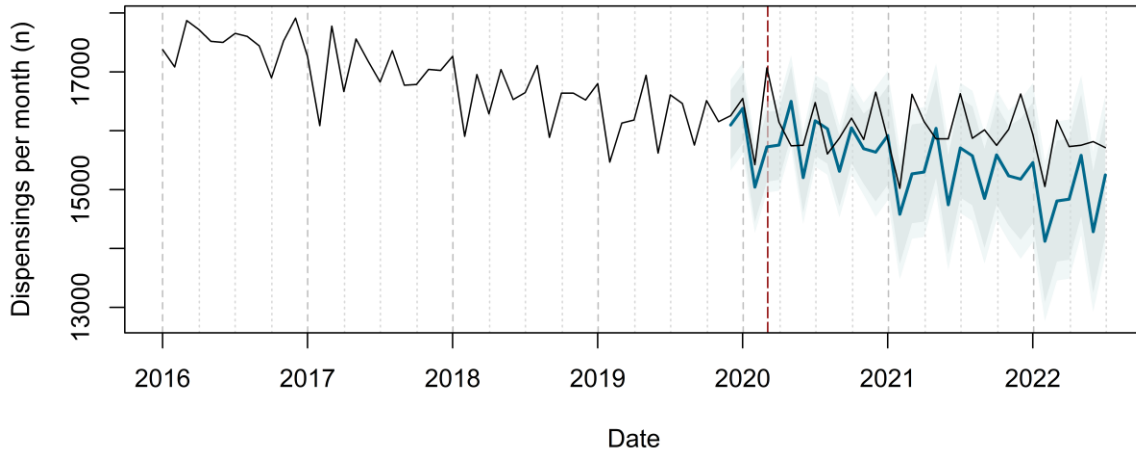

### Olanzapine Dispensing Forecast

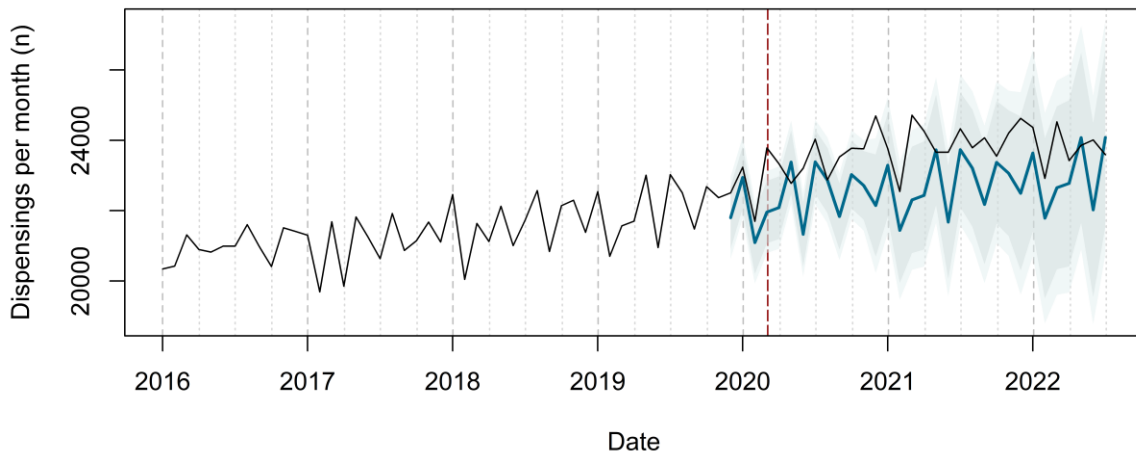

### Olmesartan Medoxomil Dispensing Forecast

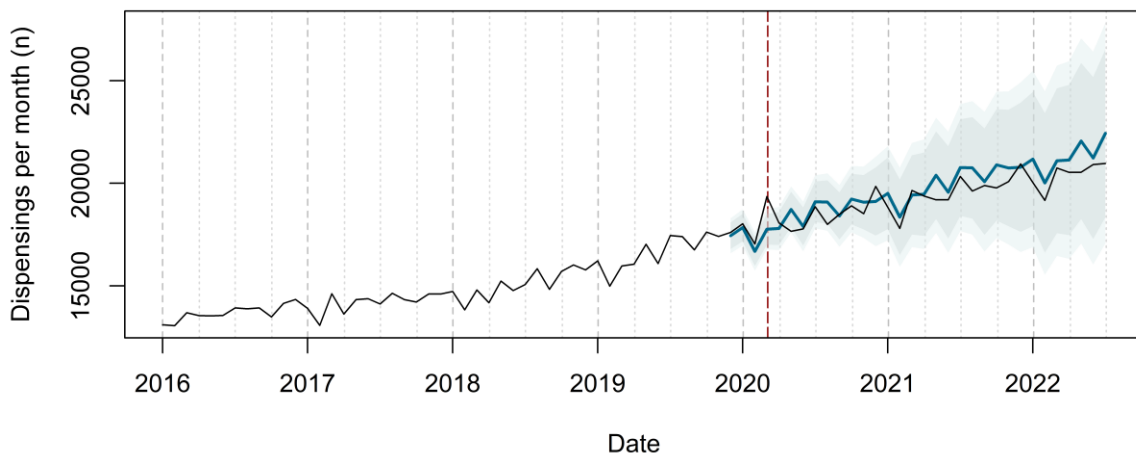

### Omeprazole Dispensing Forecast

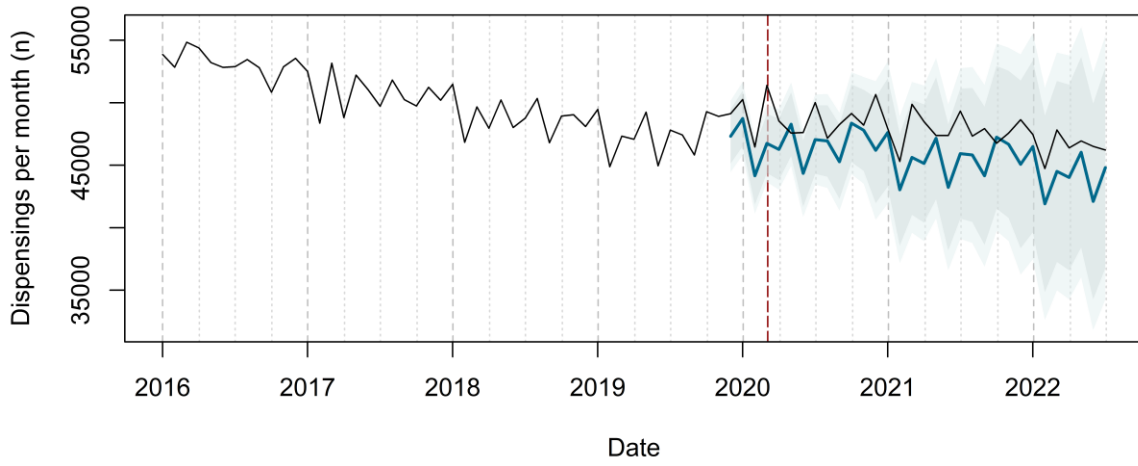

### Ostomy Requisites Dispensing Forecast

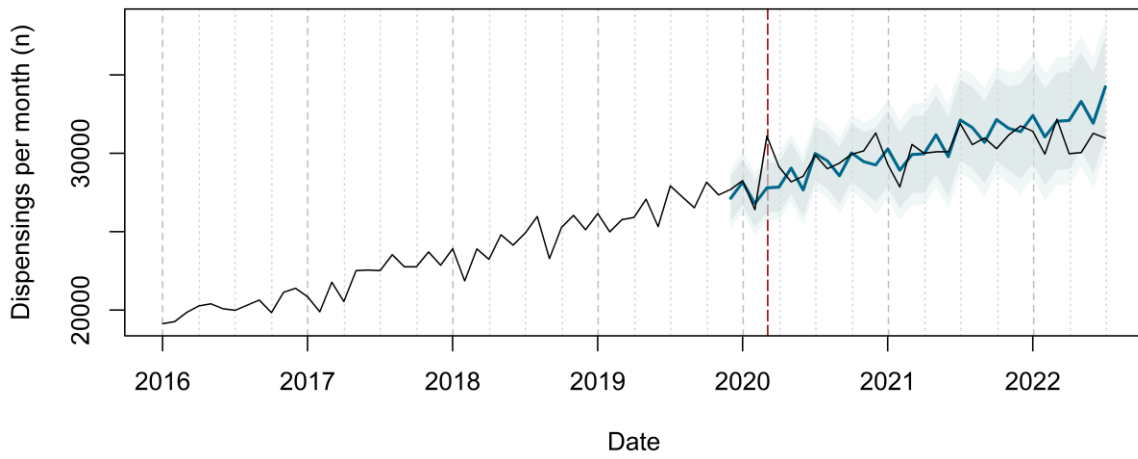

### Other Agents Acting on the Renin-Angiotensin System Dispensing Forecast

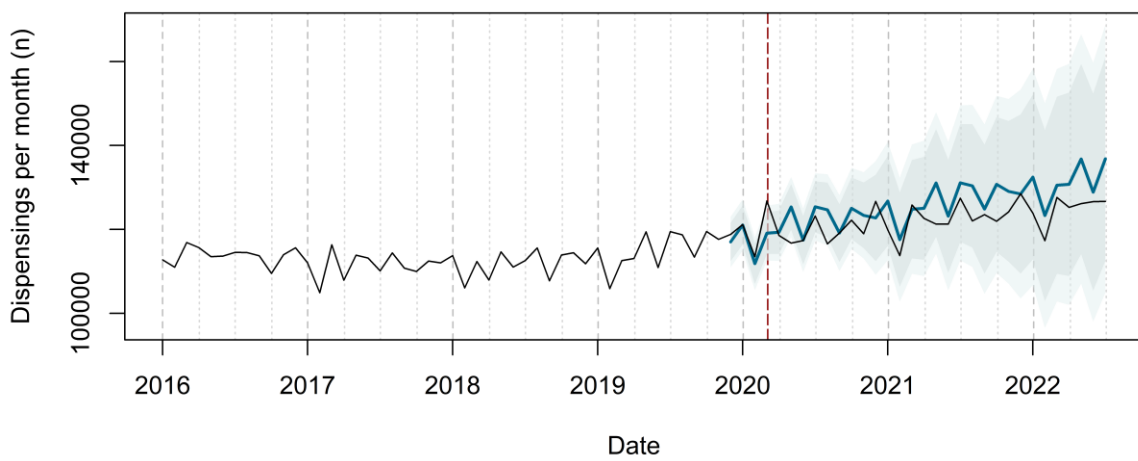

### Other Analgesics Dispensing Forecast

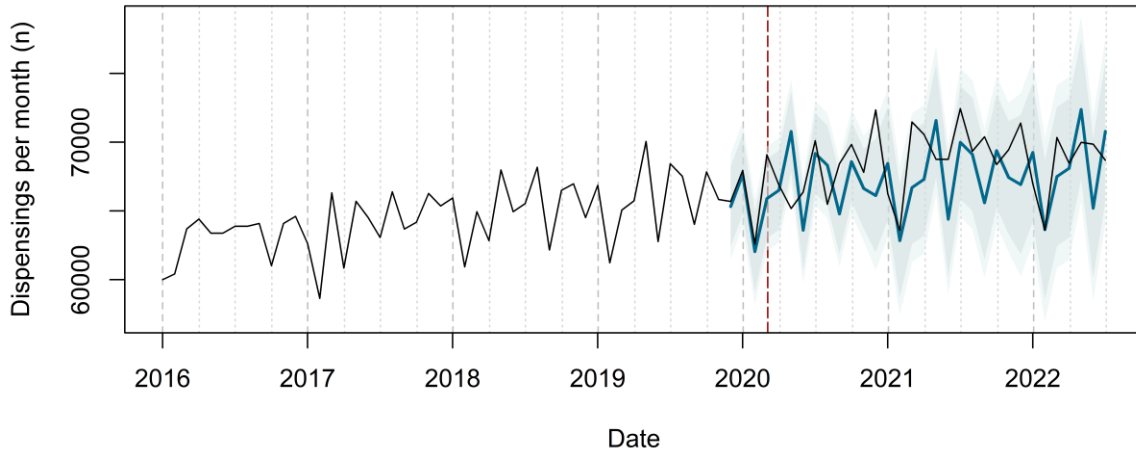

### Other Antianemic Preparations Dispensing Forecast

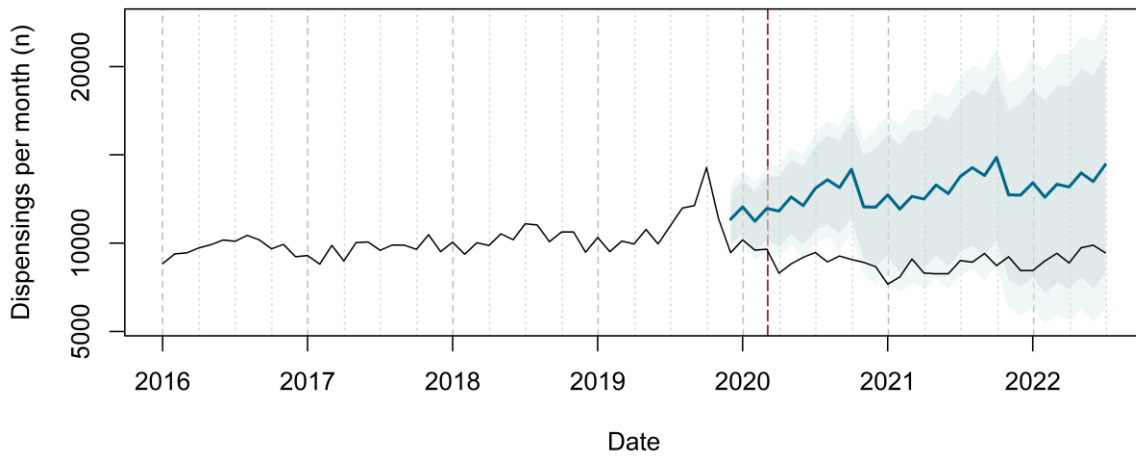

### Other Antibacterials for Systemic Use Dispensing Forecast

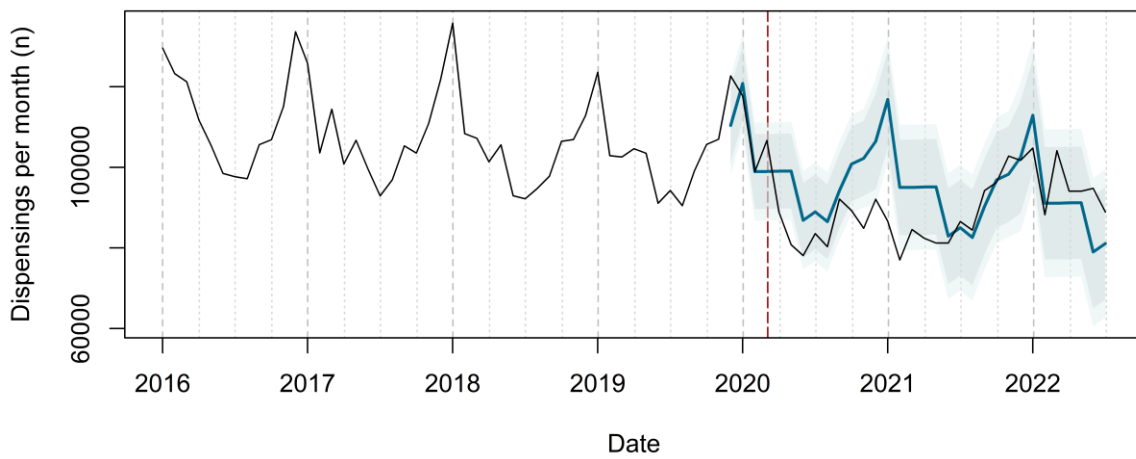

### Other Antiinflammatory and Antirheumatic Products Dispensing Forecast

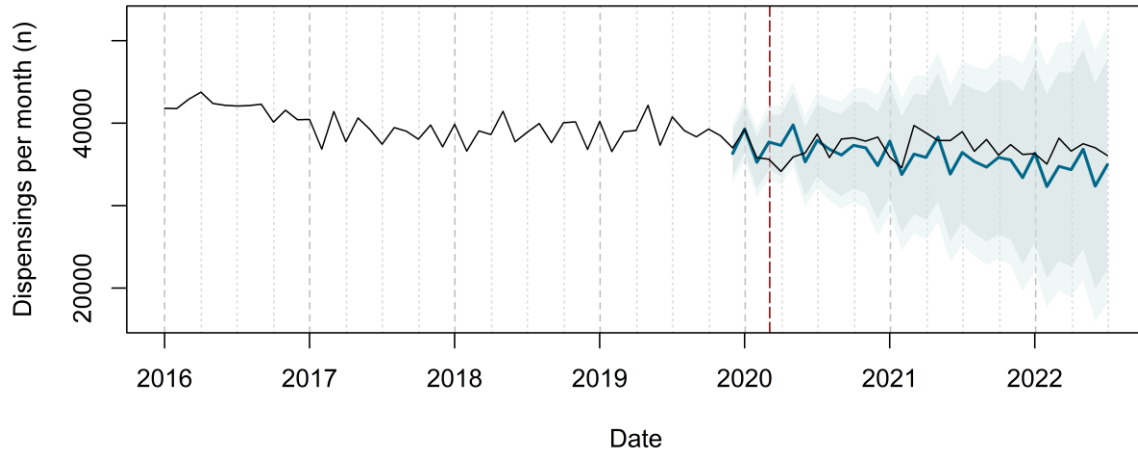

### Other Antithrombotic Agents Dispensing Forecast

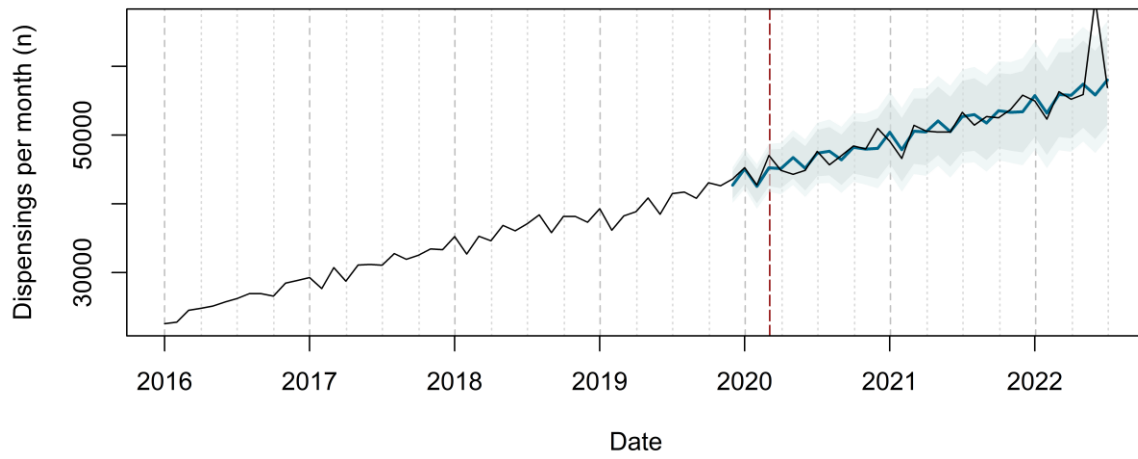

### Other Beta Blocking Agents Dispensing Forecast

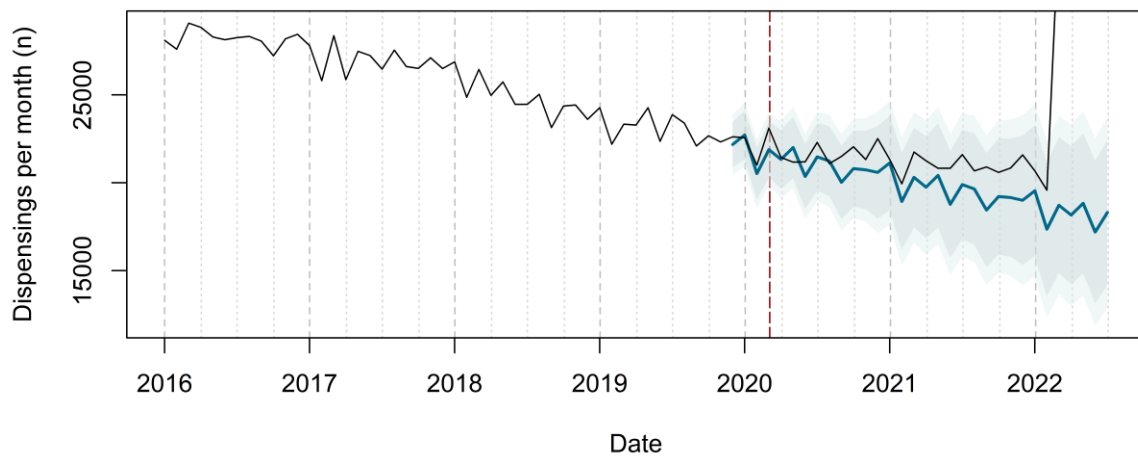

### Other Calcium Channel Blockers Dispensing Forecast

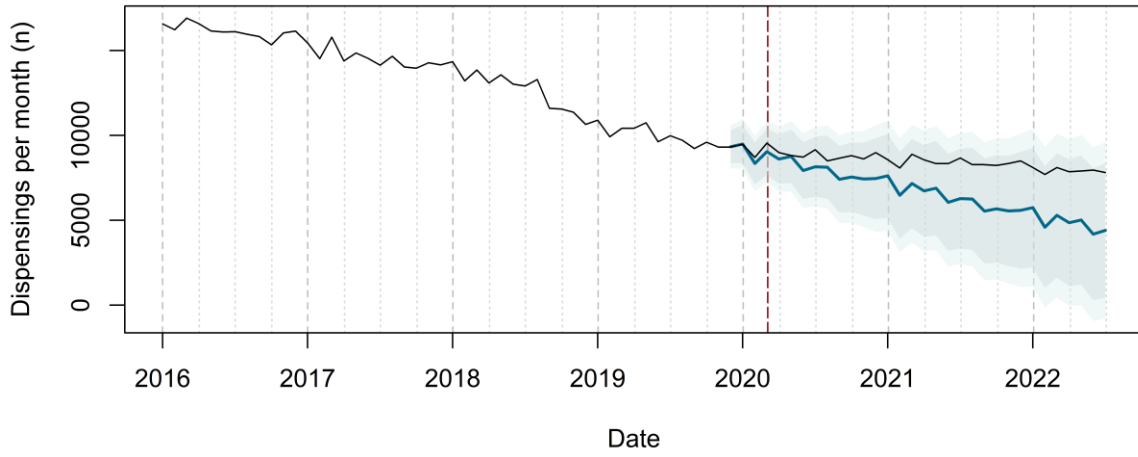

### Other Drugs for Acid Related Disorders Dispensing Forecast

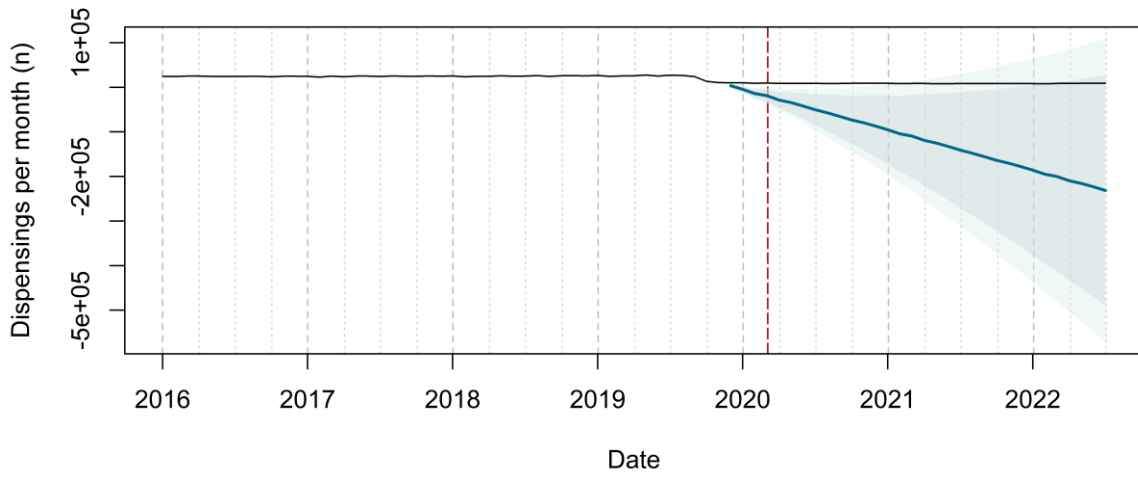

### Other Drugs for Obstructive Airway Diseases Dispensing Forecast

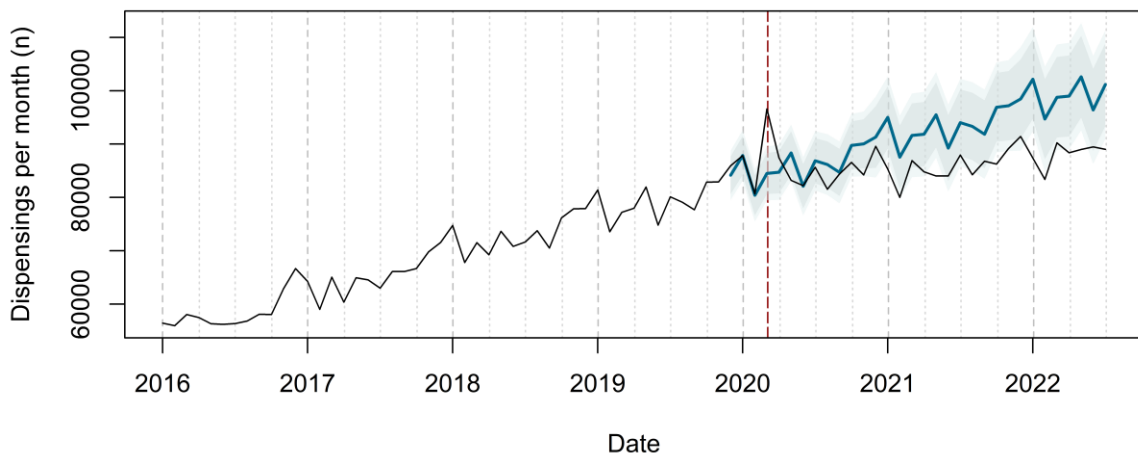

### Other Emollients and Protectives Dispensing Forecast

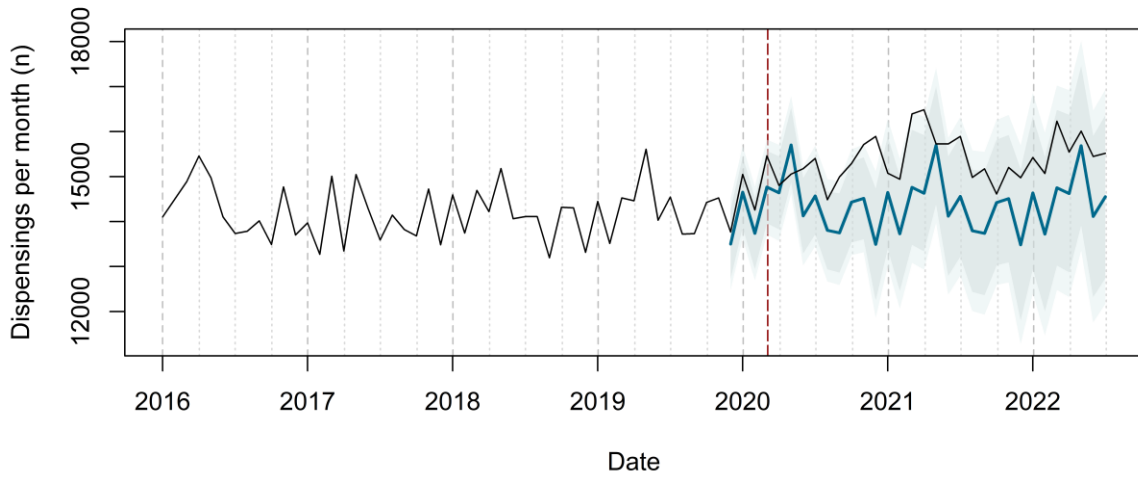

### Other Laxatives Dispensing Forecast

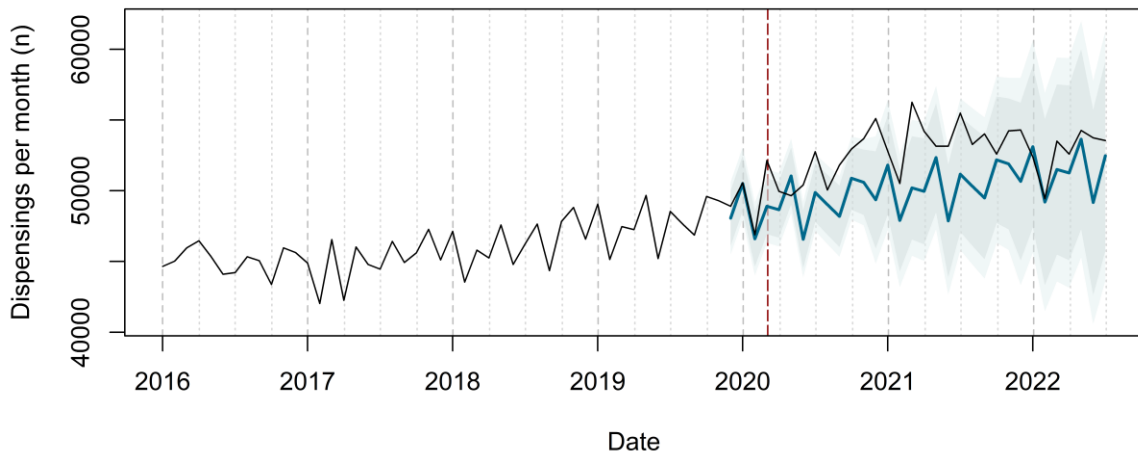

### Other Ophthalmologicals Dispensing Forecast

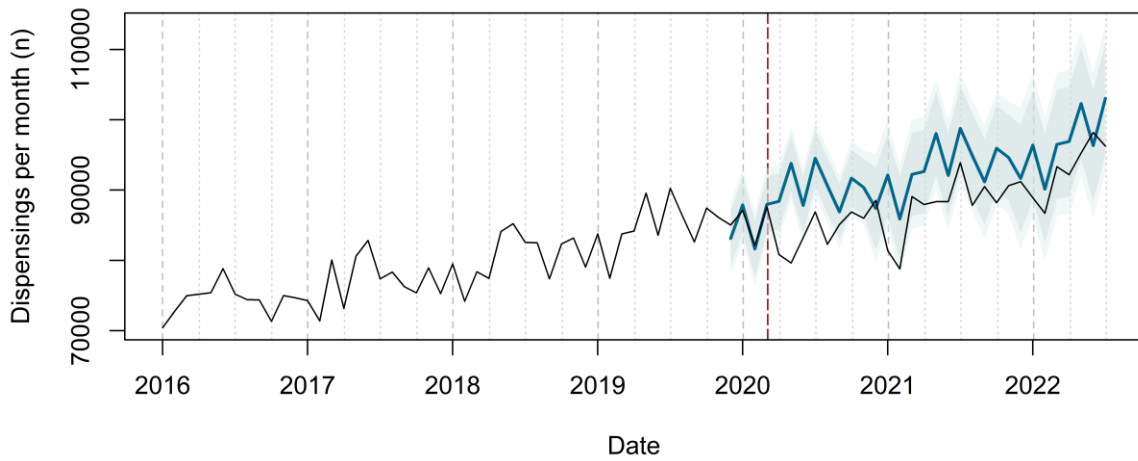



### Other Psychoanalectics Dispensing Forecast

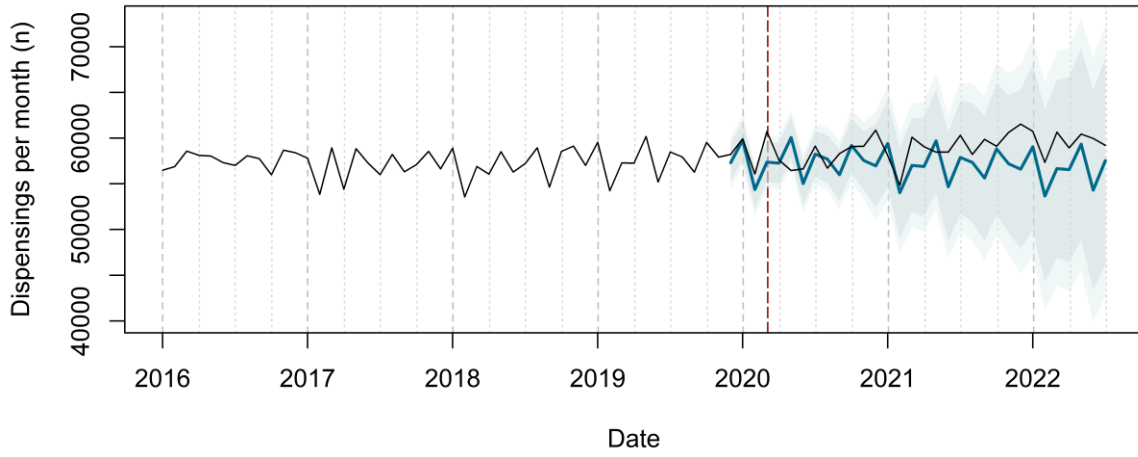

### Other Psycholeptics Dispensing Forecast

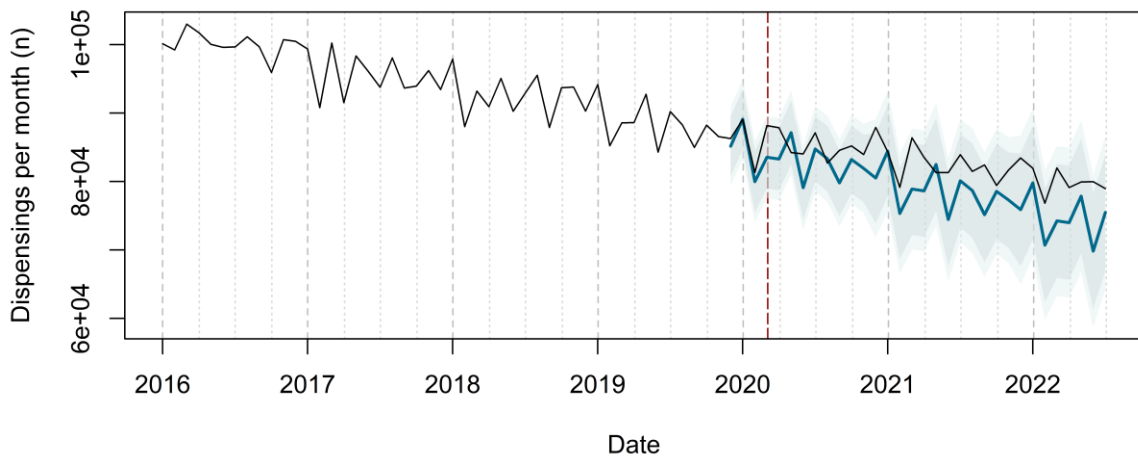

### Other Serum Lipid Reducing Agents Dispensing Forecast

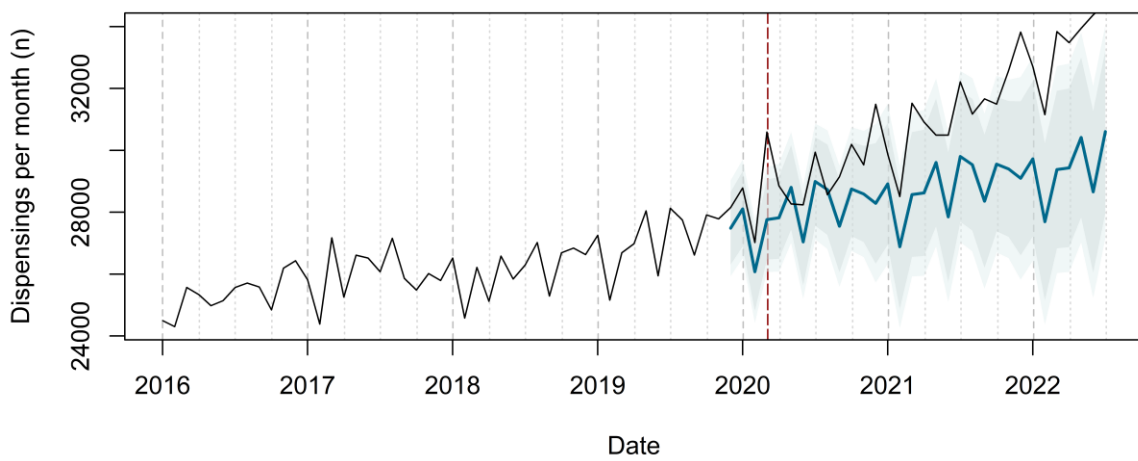

### Other Sex Hormones and Modulators of the Genital System Dispensing Forecast

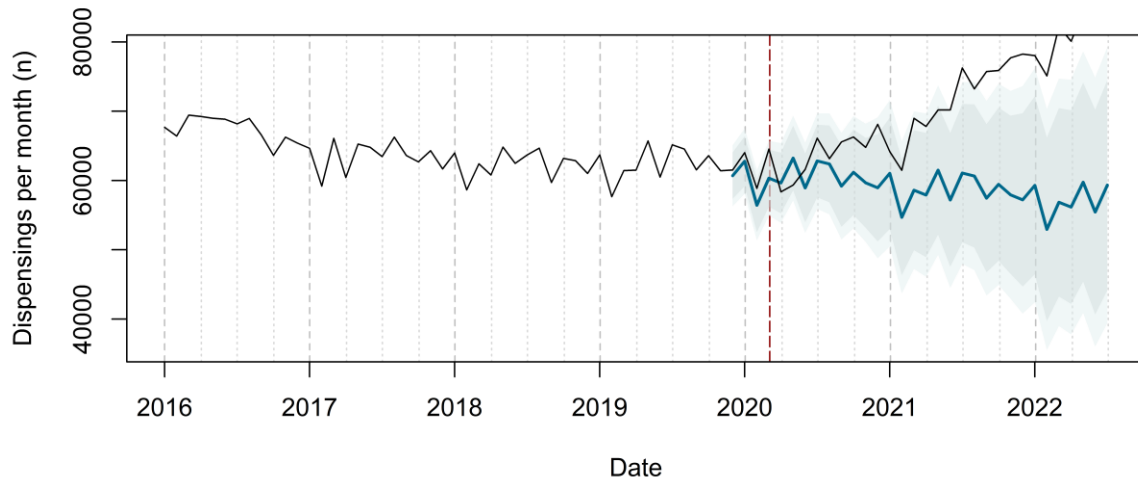

### Other Topical Products for Joint and Muscular Pain Dispensing Forecast

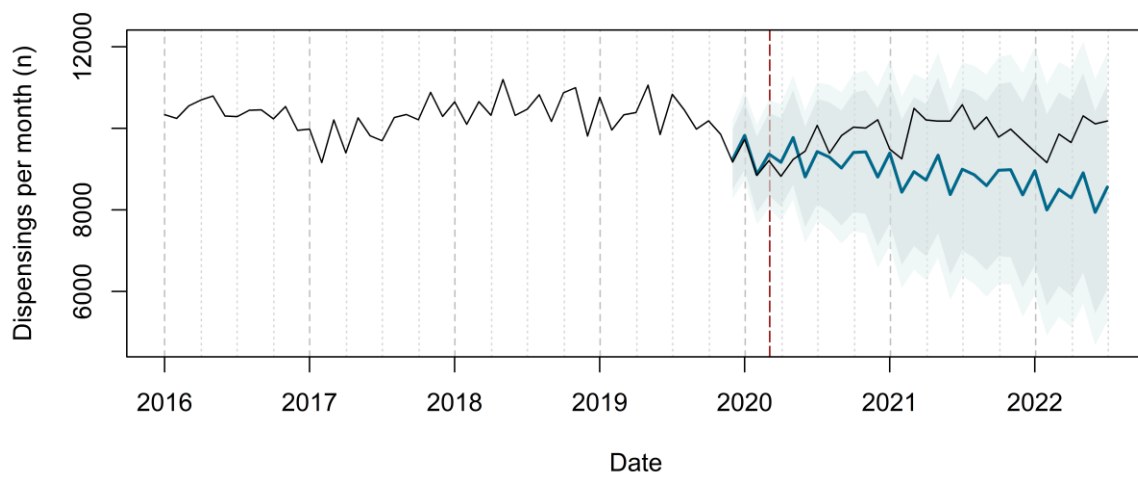

### Other Urologicals Dispensing Forecast

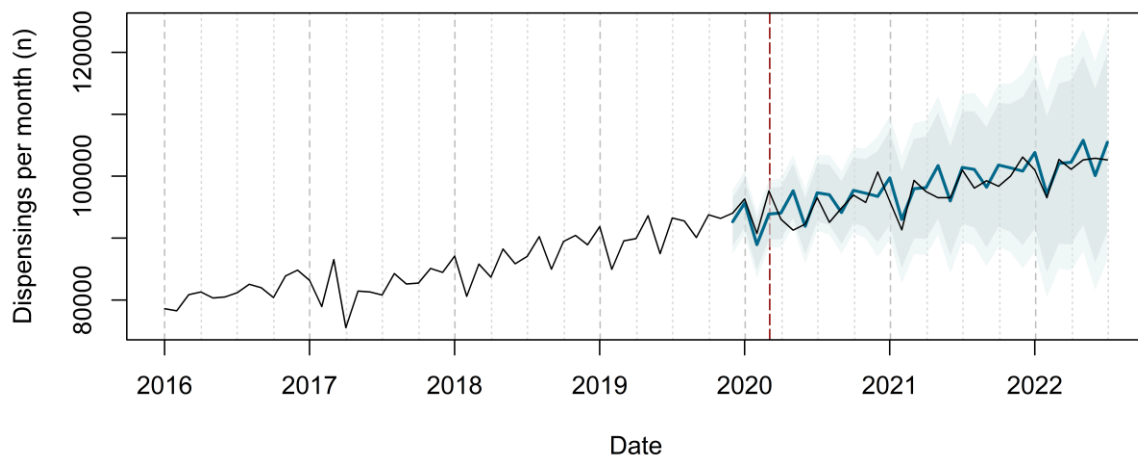

### Pancreatic Hormones dispensing forecast

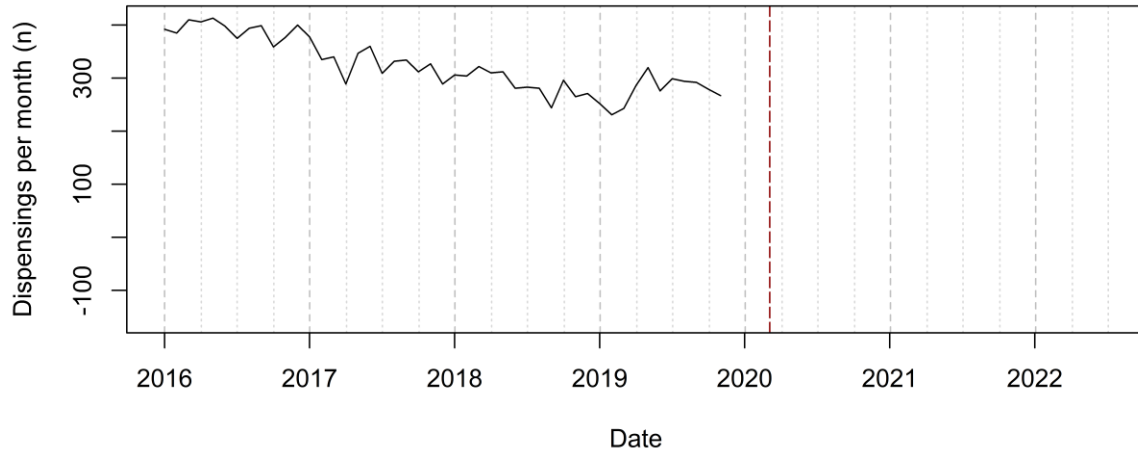

### Pantoprazole Dispensing Forecast

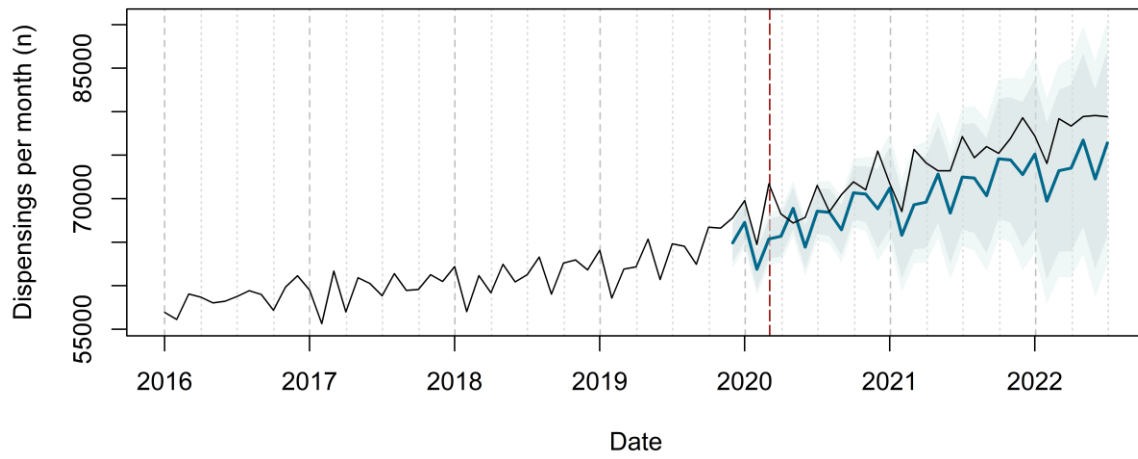

### Paracetamol Dispensing Forecast

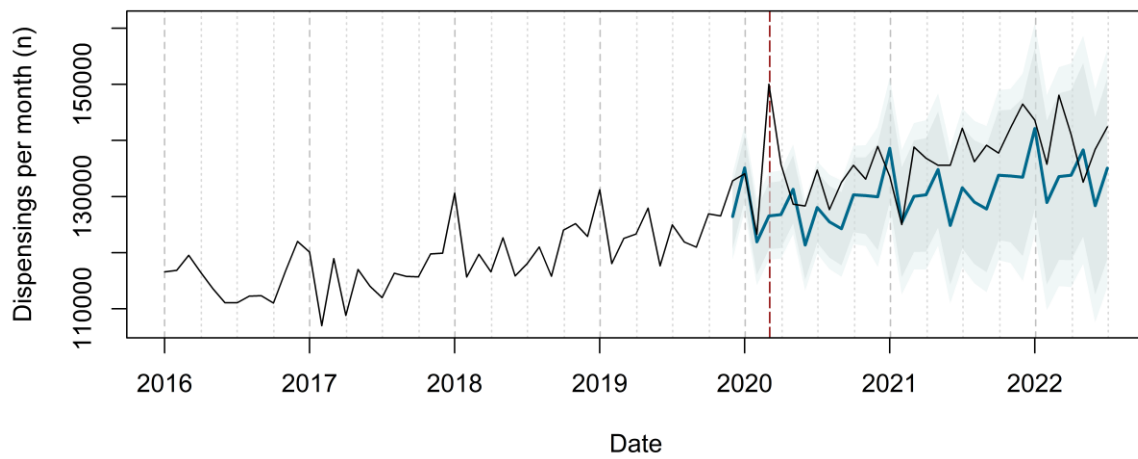

**Perindopril Dispensing Forecast**

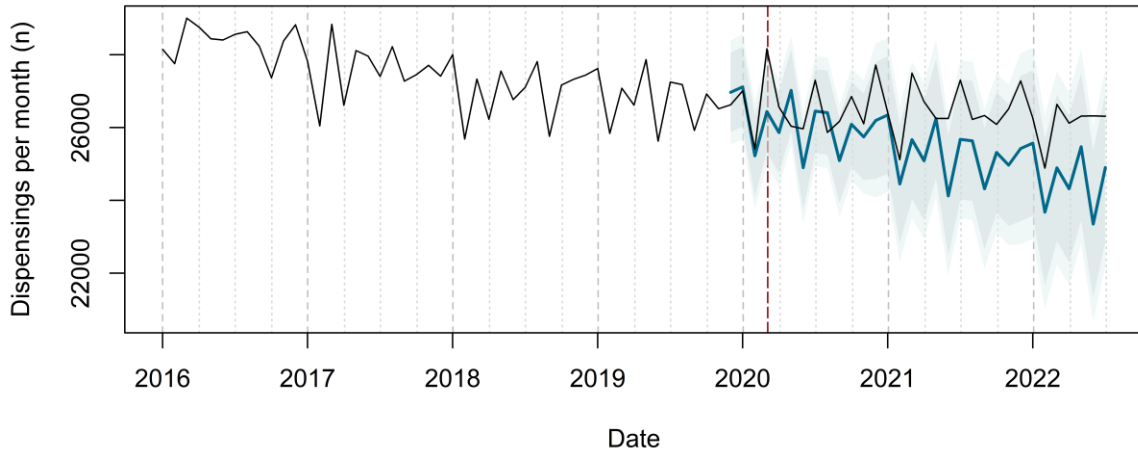

**Pravastatin Dispensing Forecast**

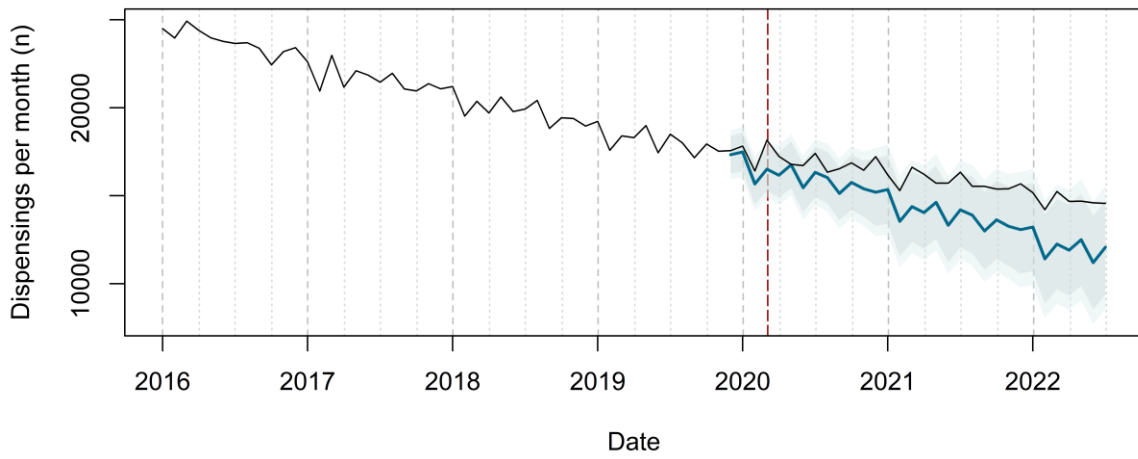

**Prednisolone (Systemic) Dispensing Forecast**

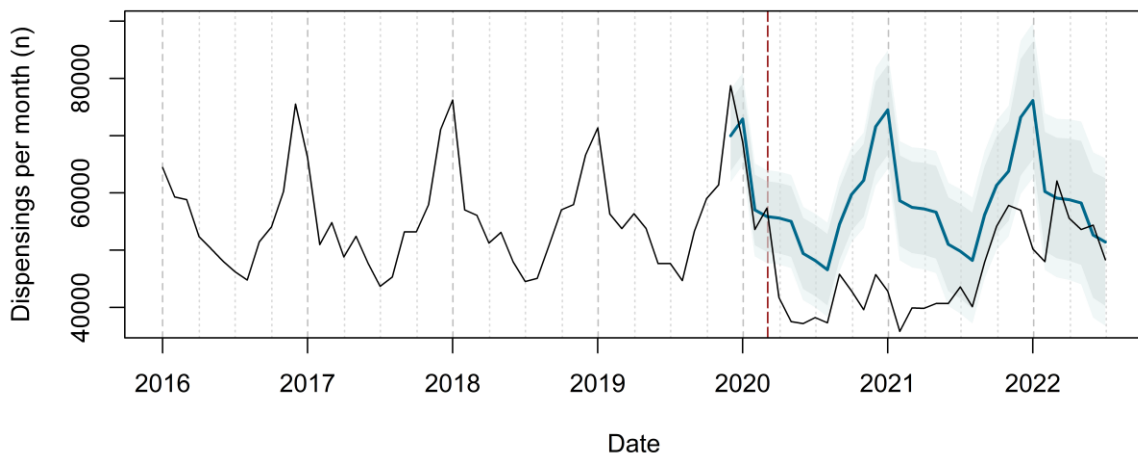

**Pregabalin Dispensing Forecast**

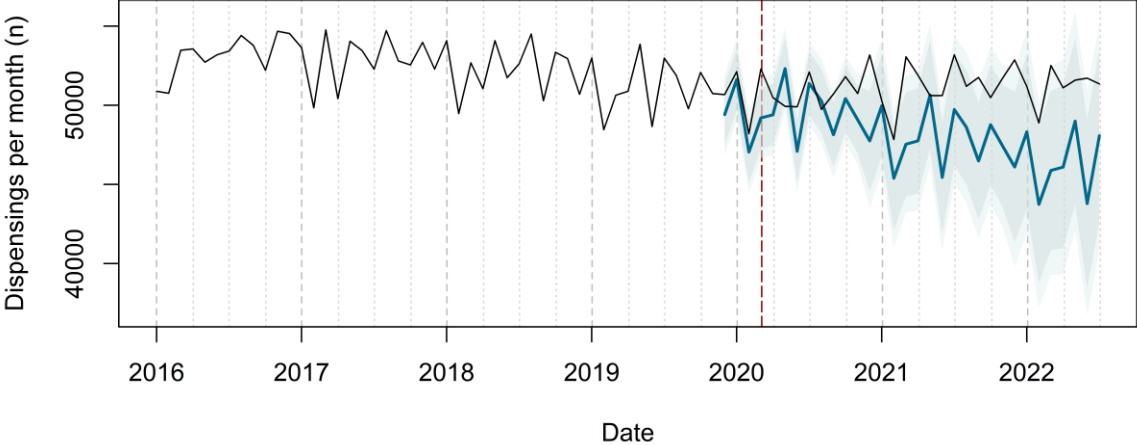

**Quetiapine Dispensing Forecast**

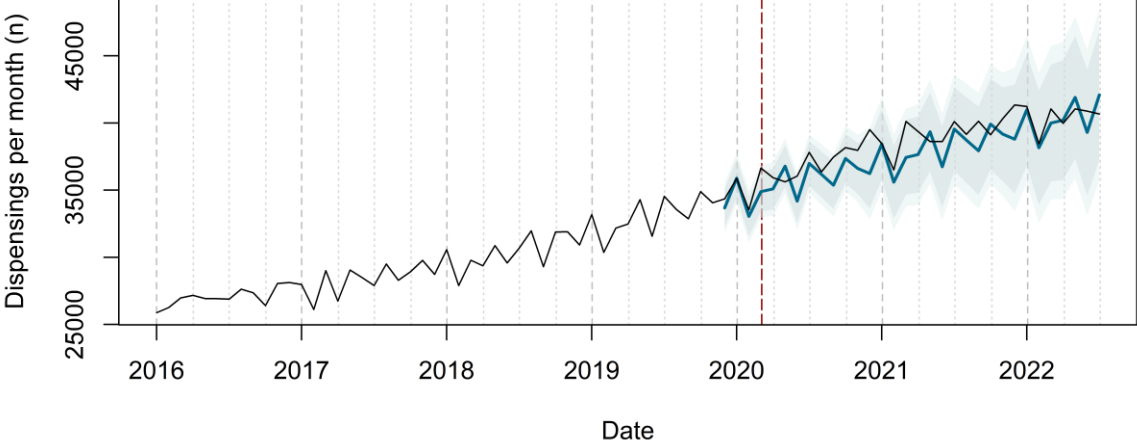

**Ramipril Dispensing Forecast**

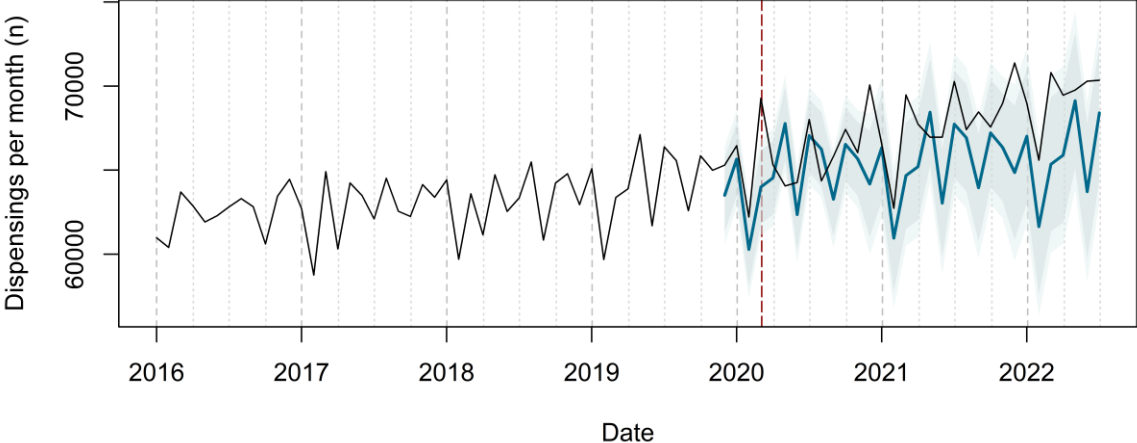

### Rivaroxaban Dispensing Forecast

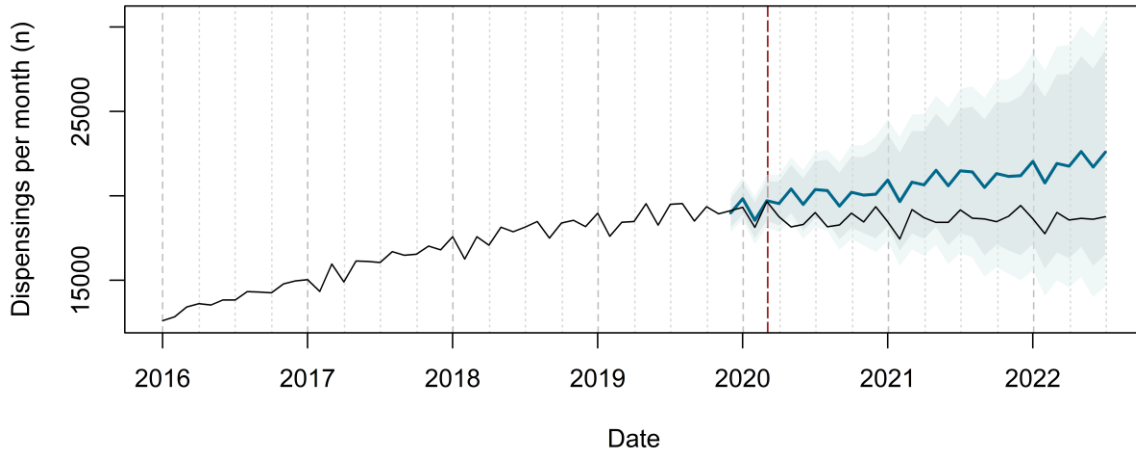

### Rosuvastatin Dispensing Forecast

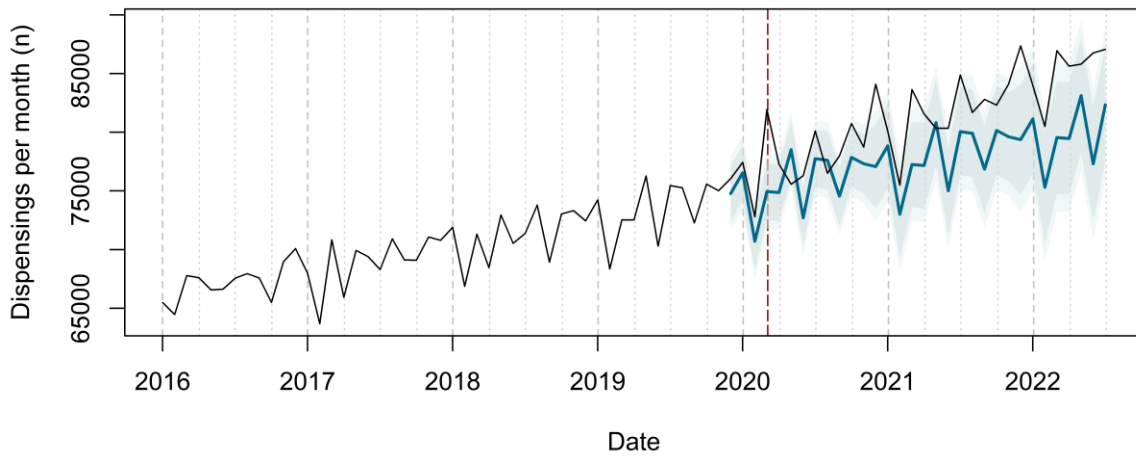

### Salbutamol (Inhaled) Dispensing Forecast

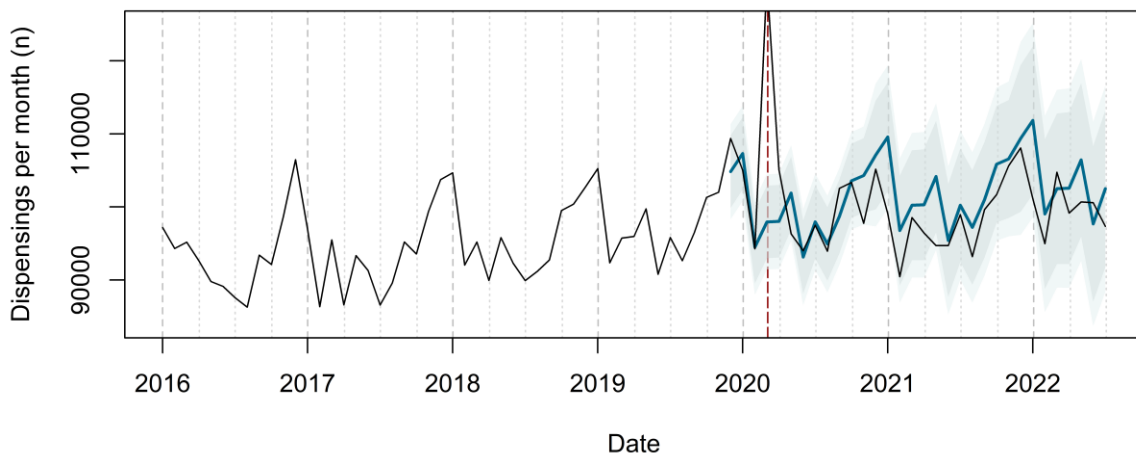

### Salmeterol and Fluticasone Dispensing Forecast

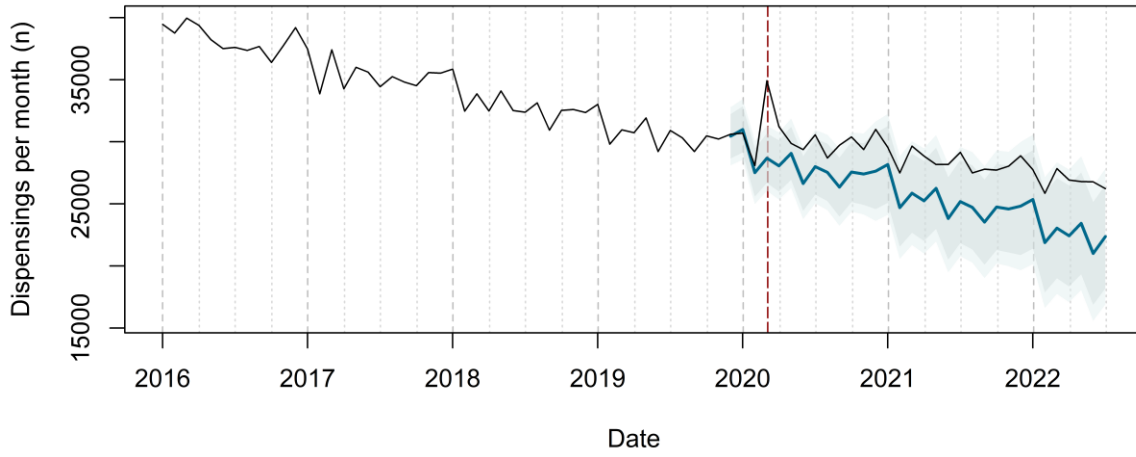

### Sertraline Dispensing Forecast

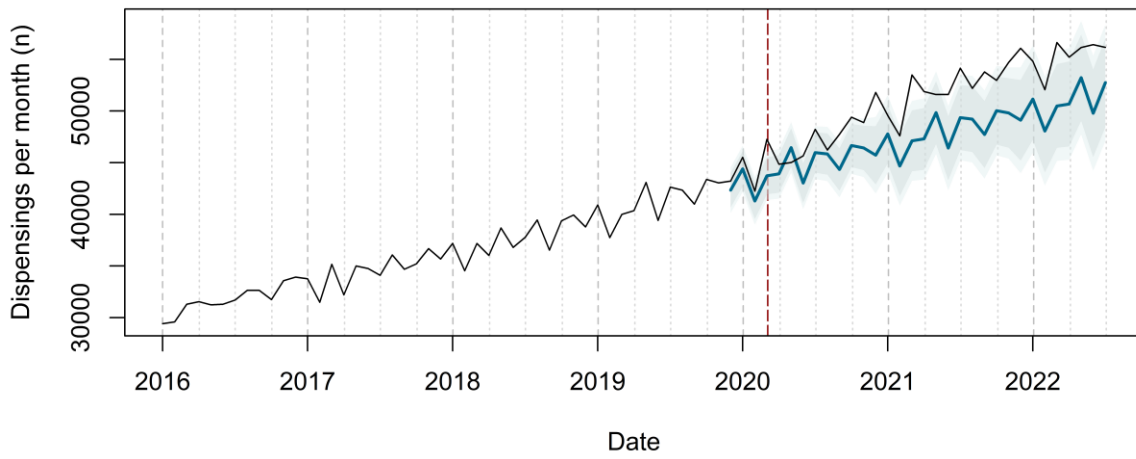

### Simvastatin Dispensing Forecast

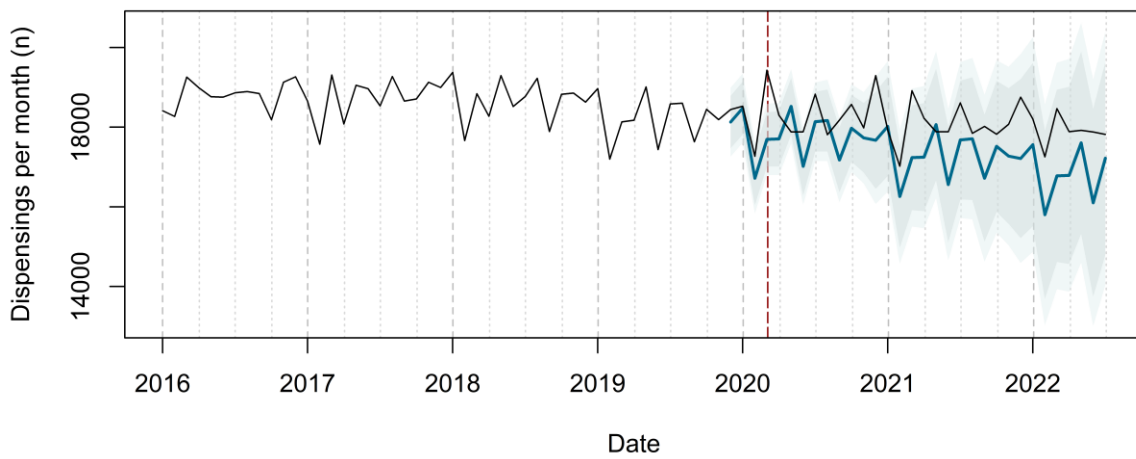

### Tamsulosin Dispensing Forecast

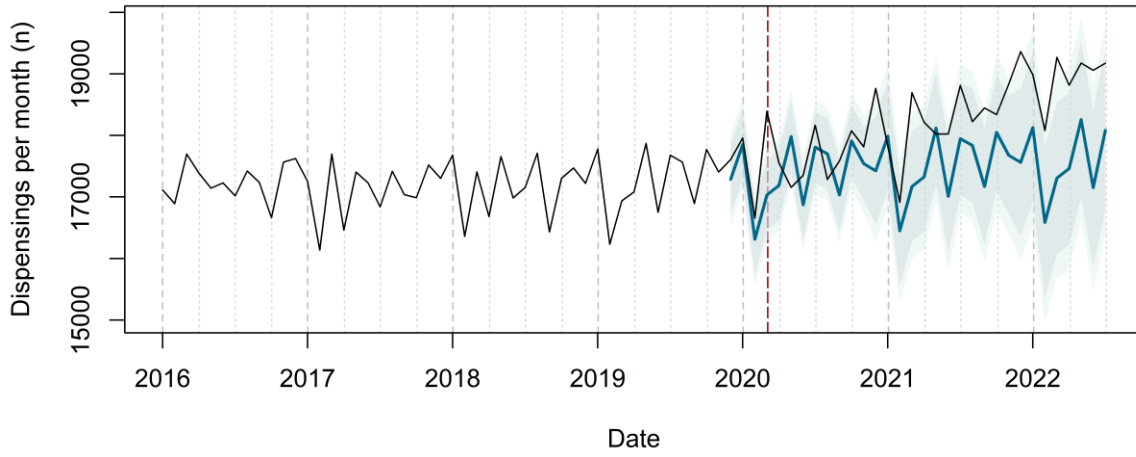

### Tiotropium Bromide Dispensing Forecast

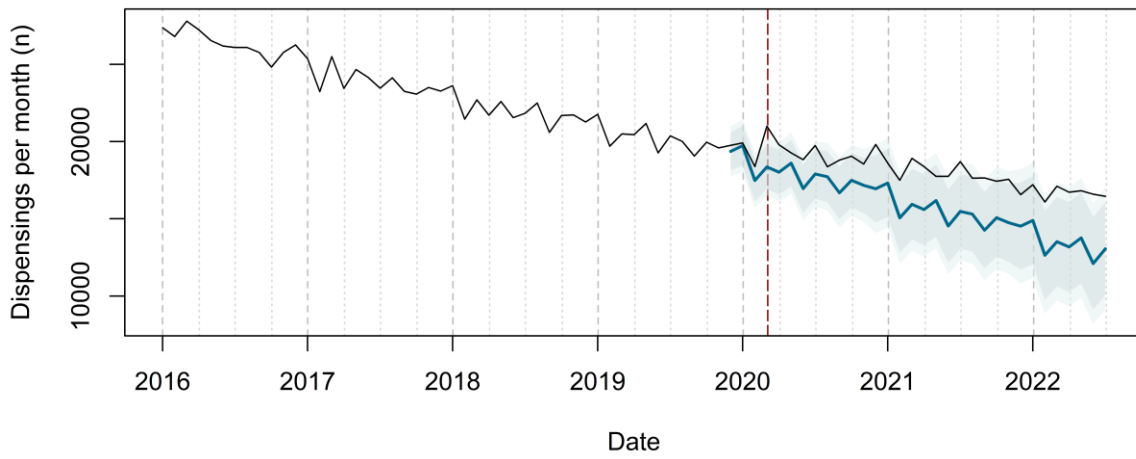

### Tramadol Dispensing Forecast

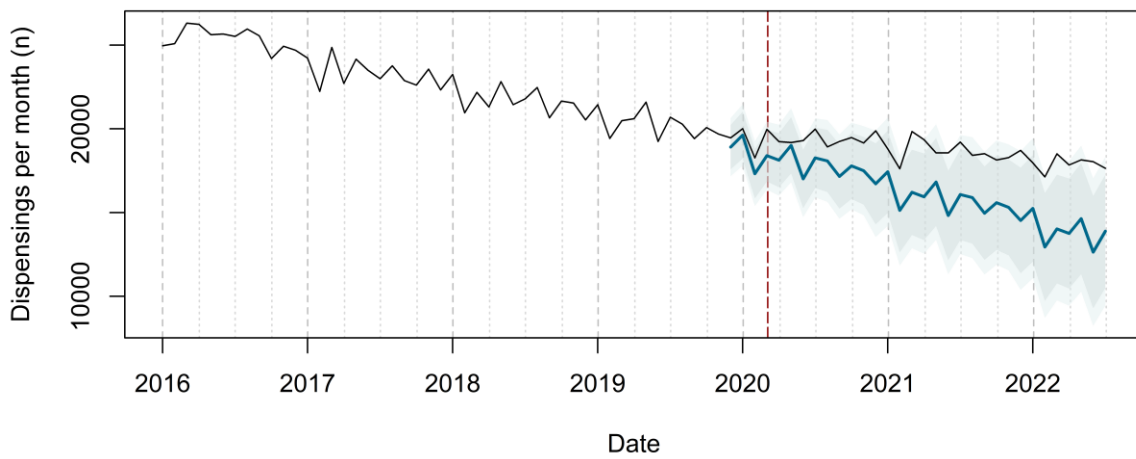



**Valsartan Dispensing Forecast**

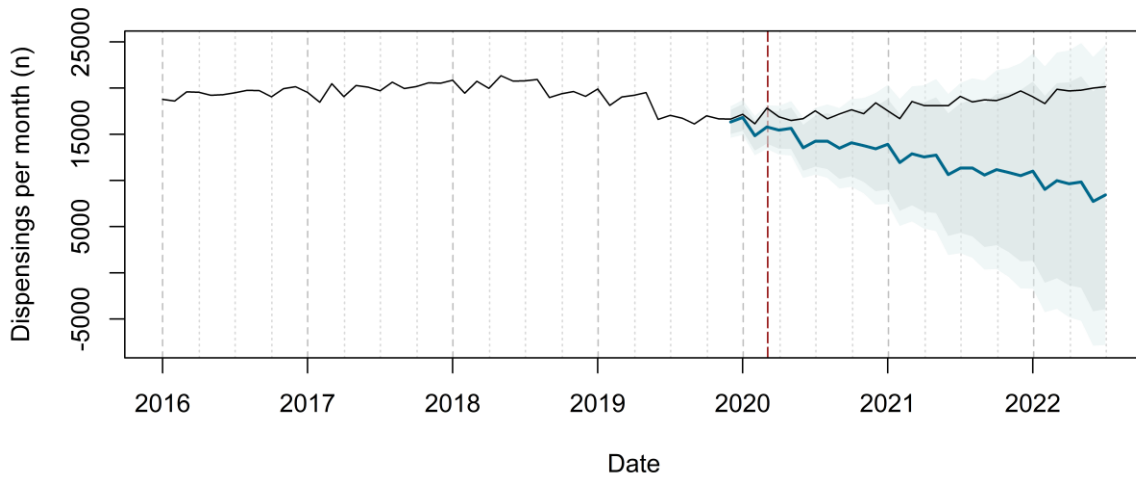

**Venlafaxine Dispensing Forecast**

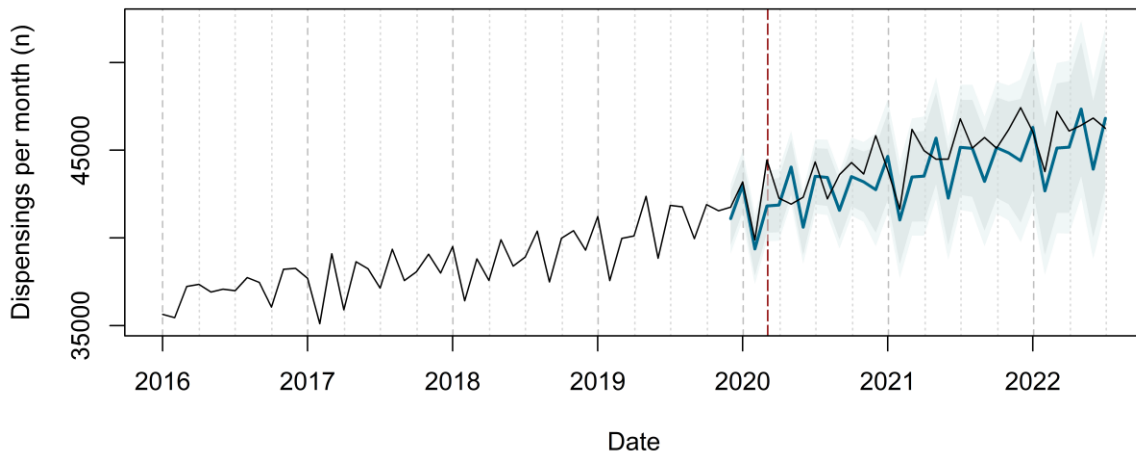

**Warfarin Dispensing Forecast**

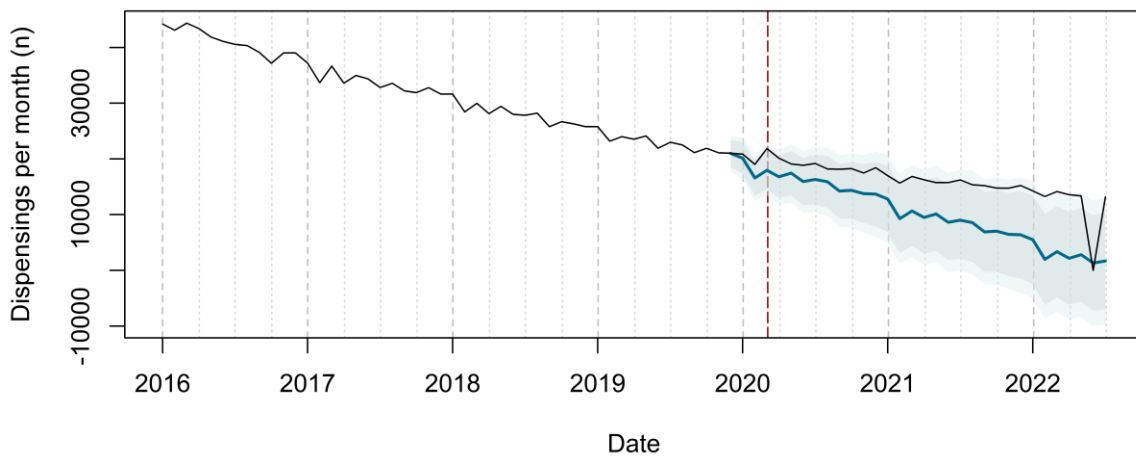

### Zolpidem Dispensing Forecast

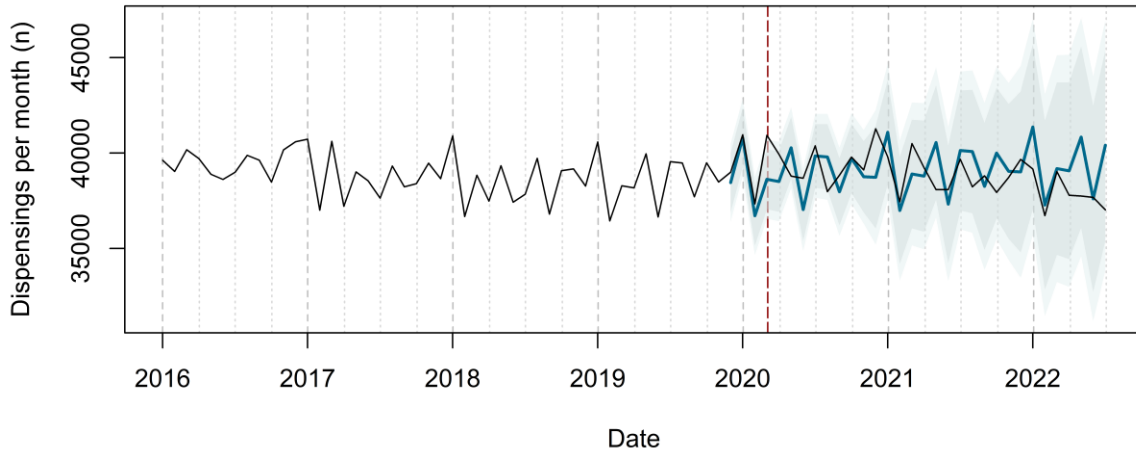

### Zopiclone Dispensing Forecast

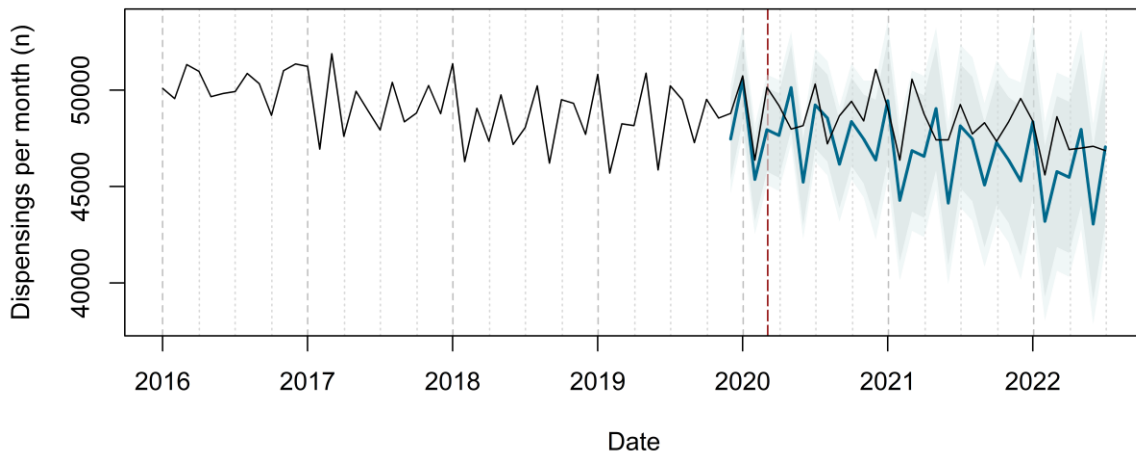

Supplement: Supplementary file [file media-4.pdf]
